# Supplementary material for: Characterization of QTL and Environmental Interactions Controlling Flowering Time in Andean Common Bean (Phaseolus vulgaris L.)
Source: Front Plant Sci. 2021 Jan 14;11:599462. doi: 10.3389/fpls.2020.599462 (PMC7840541; doi:10.3389/fpls.2020.599462)
Supplement: Supplementary file 2 [file Table_1.XLSX]

## Sheet: Table S9. Candidate genes
Table S9. Candidate genes identified in the main QTL.
Genomic region (chromosome, position in cM)	Identified QTL	Environments, years	Gene ID in common bean	Homologous gene ID in A. thaliana	Gene name in A. thaliana	Flowering pathway	Gene description in databases
1 (47.64-49.04)	DTF-1.4, GDD-1.4, eGDD-1.4	LD3, LD6, SD2, SD3	Phvul.001G222900	AT1G09430	ACLA-3		Encodes subunit A of the heteromeric enzyme ATP citrate lyase (ACL). In animals, ACL is encoded by a single gene; ACL in Arabidopsis is composed of two polypeptides, ACLA (encoded by 3 genes) and ACLB (encoded by 2 genes). The holoenzyme has an A(4)B(4)stoichiometry. Expression of both ACLA and ACLB but not of either of the subunits alone results in ACL activity.ATP-citrate lyase A-3 (ACLA-3); CO…
1 (47.64-49.04)	DTF-1.4, GDD-1.4, eGDD-1.4	LD3, LD6, SD2, SD3	Phvul.001G234600	AT3G55560	AGF2		AT-hook protein of GA feedback 2 (AGF2); INVOLVED IN: biological_process unknown; LOCATED IN: chloroplast; EXPRESSED IN: 19 plant structures; EXPRESSED DURING: 6 growth stages; CONTAINS InterPro DOMAIN/s: Protein of unknown function DUF296 (InterPro:IPR005175), Predicted AT-hook DNA-binding (InterPro:IPR014476); BEST Arabidopsis thaliana protein match is: AT-hook motif nuclear-localized protein 2…
1 (47.64-49.04)	DTF-1.4, GDD-1.4, eGDD-1.4	LD3, LD6, SD2, SD3	Phvul.001G228600	AT5G48670	AGL80	Flower development	AGL80 is a member of the MADS box family of genes. AGL80 functions as a transcription factor within the central cell gene regulatory network and controls the expression of downstream genes required for central cell development and function.AGAMOUS-like 80 (AGL80); FUNCTIONS IN: DNA binding, sequence-specific DNA binding transcription factor activity; INVOLVED IN: regulation of transcription, DNA-…
1 (47.64-49.04)	DTF-1.4, GDD-1.4, eGDD-1.4	LD3, LD6, SD2, SD3	Phvul.001G233800	AT2G04660	APC2		a highly conserved ubiquitin-protein ligase involved in cell cycle regulation. anaphase-promoting complex/cyclosome 2 (APC2); FUNCTIONS IN: ubiquitin-protein ligase activity, ubiquitin protein ligase binding; INVOLVED IN: ubiquitin-dependent protein catabolic process; LOCATED IN: ubiquitin ligase complex; EXPRESSED IN: 12 plant structures; EXPRESSED DURING: 6 growth stages; CONTAINS InterPro DOMA…
1 (47.64-49.04)	DTF-1.4, GDD-1.4, eGDD-1.4	LD3, LD6, SD2, SD3	Phvul.001G232900	AT3G12380	ARP5	Photoperiod	actin-related protein 5 (ARP5); CONTAINS InterPro DOMAIN/s: Actin/actin-like (InterPro:IPR004000); BEST Arabidopsis thaliana protein match is: Actin-like ATPase superfamily protein (TAIR:AT2G42100.1).
1 (47.64-49.04)	DTF-1.4, GDD-1.4, eGDD-1.4	LD3, LD6, SD2, SD3	Phvul.001G224600	AT1G09250	ATBS1		basic helix-loop-helix (bHLH) DNA-binding superfamily protein; FUNCTIONS IN: sequence-specific DNA binding transcription factor activity; INVOLVED IN: regulation of transcription; LOCATED IN: nucleus, chloroplast; EXPRESSED IN: 22 plant structures; EXPRESSED DURING: 13 growth stages; CONTAINS InterPro DOMAIN/s: Helix-loop-helix DNA-binding domain (InterPro:IPR001092), Helix-loop-helix DNA-binding…
1 (47.64-49.04)	DTF-1.4, GDD-1.4, eGDD-1.4	LD3, LD6, SD2, SD3	Phvul.001G236400	AT2G39760	BPM3		Encodes a member of the MATH-BTB domain proteins (BPMs) that directly interact with and target for proteasomal degradation the class I homeobox-leucine zipper (HD-ZIP) transcription factor ATHB6. Known members include AT5G19000 (BPM1), AT3G06190 (BPM2), AT2G39760 (BPM3), AT3G03740 (BPM4), AT5G21010 (BPM5) and AT3G43700 (BPM6).BPM3; CONTAINS InterPro DOMAIN/s: TRAF-like (InterPro:IPR008974), MATH …
1 (47.64-49.04)	DTF-1.4, GDD-1.4, eGDD-1.4	LD3, LD6, SD2, SD3	Phvul.001G231000	AT1G66400	CML23	Flower development	Encodes a calmodulin-like protein. Regulates nitric oxide levels and transition to flowering. FUNCTIONS IN: calcium ion binding; INVOLVED IN: regulation of flower development, regulation of nitric oxide metabolic process; LOCATED IN: cellular_component unknown; EXPRESSED IN: 28 plant structures; EXPRESSED DURING: 9 growth stages; CONTAINS InterPro DOMAIN/s: EF-Hand 1, calcium-binding site (InterP…
1 (47.64-49.04)	DTF-1.4, GDD-1.4, eGDD-1.4	LD3, LD6, SD2, SD3	Phvul.001G228500	AT1G66160	CMPG1		FUNCTIONS IN: ubiquitin-protein ligase activity, binding; INVOLVED IN: response to chitin; LOCATED IN: ubiquitin ligase complex; EXPRESSED IN: 18 plant structures; EXPRESSED DURING: 9 growth stages; CONTAINS InterPro DOMAIN/s: U box domain (InterPro:IPR003613), Armadillo-type fold (InterPro:IPR016024); BEST Arabidopsis thaliana protein match is: ARM repeat superfamily protein (TAIR:AT5G37490.1);
1 (47.64-49.04)	DTF-1.4, GDD-1.4, eGDD-1.4	LD3, LD6, SD2, SD3	Phvul.001G223800	AT1G09340	CRB		Encodes CHLOROPLAST RNA BINDING (CRB), a putative RNA-binding protein. CRB is important for the proper functioning of the chloroplast. Mutations in CRB also affects the circadian system, altering the expression of both oscillator and output genes.chloroplast RNA binding (CRB); FUNCTIONS IN: coenzyme binding, binding, catalytic activity; INVOLVED IN: in 6 processes; LOCATED IN: in 10 components; E…
1 (47.64-49.04)	DTF-1.4, GDD-1.4, eGDD-1.4	LD3, LD6, SD2, SD3	Phvul.001G233600	AT2G39710	CRP		Encodes a Cysteine-rich peptide (CRP) family protein. Eukaryotic aspartyl protease family protein; FUNCTIONS IN: aspartic-type endopeptidase activity; INVOLVED IN: proteolysis; EXPRESSED IN: 20 plant structures; EXPRESSED DURING: 10 growth stages; CONTAINS InterPro DOMAIN/s: Peptidase aspartic (InterPro:IPR021109), Peptidase aspartic, catalytic (InterPro:IPR009007), Peptidase A1 (InterPro:IPR0014…
1 (47.64-49.04)	DTF-1.4, GDD-1.4, eGDD-1.4	LD3, LD6, SD2, SD3	Phvul.001G236801	AT2G39770	CYT1		Encodes a GDP-mannose pyrophosphorylase/ mannose-1-pyrophosphatase. This enzyme provides GDP-mannose, which is used for cell wall carbohydrate biosynthesis and protein glycosylation as well as for ascorbate (vitamin C) biosynthesis. Mutations in this gene confer hypersensitivity to NH4+.CYTOKINESIS DEFECTIVE 1 (CYT1); CONTAINS InterPro DOMAIN/s: Trimeric LpxA-like (InterPro:IPR011004), Bacterial …
1 (47.64-49.04)	DTF-1.4, GDD-1.4, eGDD-1.4	LD3, LD6, SD2, SD3	Phvul.001G222000	AT5G26610	D111/G		D111/G-patch domain-containing protein; FUNCTIONS IN: zinc ion binding, nucleic acid binding; INVOLVED IN: biological_process unknown; LOCATED IN: intracellular; EXPRESSED IN: 23 plant structures; EXPRESSED DURING: 13 growth stages; CONTAINS InterPro DOMAIN/s: Zinc finger, C2H2-like (InterPro:IPR015880), Zinc finger, C2H2-type (InterPro:IPR007087), D111/G-patch (InterPro:IPR000467), Zinc finger, …
1 (47.64-49.04)	DTF-1.4, GDD-1.4, eGDD-1.4	LD3, LD6, SD2, SD3	Phvul.001G237100	AT2G39830	DAR2		Essential for early phloem development and function, and for root system development.DA1-related protein 2 (DAR2); FUNCTIONS IN: zinc ion binding; LOCATED IN: chloroplast; EXPRESSED IN: 23 plant structures; EXPRESSED DURING: 13 growth stages; CONTAINS InterPro DOMAIN/s: Zinc finger, LIM-type (InterPro:IPR001781), Protein of unknown function DUF3633 (InterPro:IPR022087); BEST Arabidopsis thaliana …
1 (47.64-49.04)	DTF-1.4, GDD-1.4, eGDD-1.4	LD3, LD6, SD2, SD3	Phvul.001G231700	AT3G03380	DEG7		Encodes a putative DegP protease. DegP protease 7 (DegP7); CONTAINS InterPro DOMAIN/s: Serine/cysteine peptidase, trypsin-like (InterPro:IPR009003), Peptidase S1C, HrtA/DegP2/Q/S (InterPro:IPR001940), PDZ/DHR/GLGF (InterPro:IPR001478); BEST Arabidopsis thaliana protein match is: unknown protein (TAIR:AT3G03370.1); Has 8327 Blast hits to 7895 proteins in 2064 species: Archae - 65; Bacteria - 6254;…
1 (47.64-49.04)	DTF-1.4, GDD-1.4, eGDD-1.4	LD3, LD6, SD2, SD3	Phvul.001G230400	AT5G16710	DHAR3		dehydroascorbate reductase 1 (DHAR3); FUNCTIONS IN: glutathione dehydrogenase (ascorbate) activity; INVOLVED IN: protein amino acid glutathionylation; LOCATED IN: chloroplast stroma, chloroplast, chloroplast envelope; EXPRESSED IN: 23 plant structures; EXPRESSED DURING: 14 growth stages; CONTAINS InterPro DOMAIN/s: Thioredoxin fold (InterPro:IPR012335), Glutathione S-transferase, C-terminal-like …
1 (47.64-49.04)	DTF-1.4, GDD-1.4, eGDD-1.4	LD3, LD6, SD2, SD3	Phvul.001G226600	AT5G26940	DPD1		Encodes a Mg2+-dependent DNA exonuclease that degrades organelle DNA during Arabidopsis pollen development.Polynucleotidyl transferase, ribonuclease H-like superfamily protein; FUNCTIONS IN: exonuclease activity, nucleic acid binding; LOCATED IN: intracellular, chloroplast; EXPRESSED IN: 23 plant structures; EXPRESSED DURING: 13 growth stages; CONTAINS InterPro DOMAIN/s: Exonuclease (InterPro:IPR…
1 (47.64-49.04)	DTF-1.4, GDD-1.4, eGDD-1.4	LD3, LD6, SD2, SD3	Phvul.001G233300		DVL		PF08137 - DVL family (DVL)
1 (47.64-49.04)	DTF-1.4, GDD-1.4, eGDD-1.4	LD3, LD6, SD2, SD3	Phvul.001G223900	AT1G09330	ECH; ECHIDNA		golgi apparatus membrane protein-like protein ECHIDNA protein unknown protein; FUNCTIONS IN: molecular_function unknown; INVOLVED IN: biological_process unknown; LOCATED IN: integral to membrane; EXPRESSED IN: 24 plant structures; EXPRESSED DURING: 15 growth stages; CONTAINS InterPro DOMAIN/s: Protein of unknown function DUF846, eukaryotic (InterPro:IPR008564); Has 518 Blast hits to 518 proteins …
1 (47.64-49.04)	DTF-1.4, GDD-1.4, eGDD-1.4	LD3, LD6, SD2, SD3	Phvul.001G229000	AT5G37510	EMB1467		Encodes a subunit of the 400 kDa subcomplex of the mitochondrial NADH dehydrogenase (complex I). The protein has been isolated in the male gametophyte. embryo defective 1467 (EMB1467); FUNCTIONS IN: in 6 functions; INVOLVED IN: response to oxidative stress, photorespiration, embryo development ending in seed dormancy; LOCATED IN: mitochondrion, mitochondrial membrane, chloroplast, mitochondrial r…
1 (47.64-49.04)	DTF-1.4, GDD-1.4, eGDD-1.4	LD3, LD6, SD2, SD3	Phvul.001G229600	AT5G37630	EMB2656		EMBRYO DEFECTIVE 2656 (EMB2656); FUNCTIONS IN: binding; INVOLVED IN: mitotic chromosome condensation, embryo development ending in seed dormancy; LOCATED IN: cellular_component unknown; EXPRESSED IN: 11 plant structures; EXPRESSED DURING: 6 growth stages; CONTAINS InterPro DOMAIN/s: Armadillo-type fold (InterPro:IPR016024); Has 333 Blast hits to 316 proteins in 147 species: Archae - 0; Bacteria -…
1 (47.64-49.04)	DTF-1.4, GDD-1.4, eGDD-1.4	LD3, LD6, SD2, SD3	Phvul.001G223000	AT3G07100	ERMO2		ENDOPLASMIC RETICULUM MORPHOLOGY 2 (ERMO2); FUNCTIONS IN: transporter activity, zinc ion binding; INVOLVED IN: transport, ER body organization; LOCATED IN: COPII vesicle coat; EXPRESSED IN: 23 plant structures; EXPRESSED DURING: 13 growth stages; CONTAINS InterPro DOMAIN/s: Sec23/Sec24, helical domain (InterPro:IPR006900), Sec23/Sec24 beta-sandwich (InterPro:IPR012990), Sec23/Sec24, trunk domain …
1 (47.64-49.04)	DTF-1.4, GDD-1.4, eGDD-1.4	LD3, LD6, SD2, SD3	Phvul.001G232800	AT5G13840	FZR3		FIZZY-related 3 (FZR3); FUNCTIONS IN: signal transducer activity; INVOLVED IN: signal transduction; LOCATED IN: chloroplast, heterotrimeric G-protein complex; EXPRESSED IN: 19 plant structures; EXPRESSED DURING: 11 growth stages; CONTAINS InterPro DOMAIN/s: WD40 repeat-like-containing domain (InterPro:IPR011046), WD40 repeat 2 (InterPro:IPR019782), WD40 repeat, conserved site (InterPro:IPR019775)…
1 (47.64-49.04)	DTF-1.4, GDD-1.4, eGDD-1.4	LD3, LD6, SD2, SD3	Phvul.001G223300	AT1G09420	G6PD4	Metabolic process	Encodes a protein similar to glucose-6-phosphate dehydrogenase but, based on amino acid differences in the active site and lack of activity, does not encode a functional G6PDH. The amino acid sequence for the consensus sequence of the G6PDH active site (DHYLGKE) differs in three places in this protein. gc exon splice site at 20574 is based on protein alignment, and is not confirmed experimentally…
1 (47.64-49.04)	DTF-1.4, GDD-1.4, eGDD-1.4	LD3, LD6, SD2, SD3	Phvul.001G228800	AT5G55490	GEX1		Encodes a transmembrane domain containing protein that is expressed in pollen germ cells. gamete expressed protein 1 (GEX1); Has 7985 Blast hits to 6093 proteins in 809 species: Archae - 118; Bacteria - 1642; Metazoa - 3258; Fungi - 589; Plants - 254; Viruses - 18; Other Eukaryotes - 2106 (source: NCBI BLink).
1 (47.64-49.04)	DTF-1.4, GDD-1.4, eGDD-1.4	LD3, LD6, SD2, SD3	Phvul.001G221200	AT1G09560	GLP5		Encodes a plasodesmata-located protein involved in regulating primary root growth by controlling phloem-mediated allocation of resources between the primary and lateral root meristems.germin-like protein 5 (GLP5); FUNCTIONS IN: manganese ion binding, nutrient reservoir activity; INVOLVED IN: response to cold; LOCATED IN: cell wall, nucleus; EXPRESSED IN: 22 plant structures; EXPRESSED DURING: 14 …
1 (47.64-49.04)	DTF-1.4, GDD-1.4, eGDD-1.4	LD3, LD6, SD2, SD3	Phvul.001G235300	AT1G13980	GN		Encodes a GDP/GTP exchange factor for small G-proteins of the ADP ribosylation factor (RAF) class, and as regulator of intracellular trafficking. Homologous to Sec7p and YEC2 from yeast. Involved in the specification of apical-basal pattern formation. Essential for cell division, expansion and adhesion. It appears that heteotypic binding between the DCB and C-terminal domains of two GNOM proteins…
1 (47.64-49.04)	DTF-1.4, GDD-1.4, eGDD-1.4	LD3, LD6, SD2, SD3	Phvul.001G223700	AT1G09350	GolS3		galactinol synthase 3 (GolS3); CONTAINS InterPro DOMAIN/s: Glycosyl transferase, family 8 (InterPro:IPR002495); BEST Arabidopsis thaliana protein match is: galactinol synthase 2 (TAIR:AT1G56600.1); Has 1260 Blast hits to 1259 proteins in 288 species: Archae - 0; Bacteria - 98; Metazoa - 258; Fungi - 282; Plants - 479; Viruses - 73; Other Eukaryotes - 70 (source: NCBI BLink).
1 (47.64-49.04)	DTF-1.4, GDD-1.4, eGDD-1.4	LD3, LD6, SD2, SD3	Phvul.001G229500	AT1G66200	GSR2		glutamine synthase clone F11 (GSR2); FUNCTIONS IN: glutamate-ammonia ligase activity, copper ion binding; INVOLVED IN: nitrate assimilation, response to fructose stimulus, response to salt stress, response to sucrose stimulus, response to glucose stimulus; LOCATED IN: cytosol, cytosolic ribosome, apoplast, vacuole; EXPRESSED IN: 24 plant structures; EXPRESSED DURING: 14 growth stages; CONTAINS In…
1 (47.64-49.04)	DTF-1.4, GDD-1.4, eGDD-1.4	LD3, LD6, SD2, SD3	Phvul.001G222600	AT1G09450	Haspin		Encodes a protein kinase that phosphorylates histone H3 at Thr3 and Thr11 and plays a role in mitotic cell division.Protein kinase superfamily protein; FUNCTIONS IN: protein kinase activity, ATP binding; INVOLVED IN: protein amino acid phosphorylation, N-terminal protein myristoylation; LOCATED IN: cellular_component unknown; EXPRESSED IN: 17 plant structures; EXPRESSED DURING: 11 growth stages; …
1 (47.64-49.04)	DTF-1.4, GDD-1.4, eGDD-1.4	LD3, LD6, SD2, SD3	Phvul.001G236100	AT2G39740	HESO1		Encodes HESO1 (HEN1 suppressor 1), a terminal nucleotidyl transferase that uridylates miRNAs and siRNAs at 3' end. HESO1-mediated 3' uridylation destabilizes small RNAs in hen1.Nucleotidyltransferase family protein; BEST Arabidopsis thaliana protein match is: Nucleotidyltransferase family protein (TAIR:AT3G45750.1); Has 1708 Blast hits to 1608 proteins in 227 species: Archae - 0; Bacteria - 13; M…
1 (47.64-49.04)	DTF-1.4, GDD-1.4, eGDD-1.4	LD3, LD6, SD2, SD3	Phvul.001G230300	AT1G14900	HMGA		Encodes a protein belonging to the subgroup of HMGA (high mobility group A) proteins that interact with A/T-rich stretches of DNA.high mobility group A (HMGA); FUNCTIONS IN: DNA binding; INVOLVED IN: regulation of transcription, DNA-dependent, nucleosome assembly; LOCATED IN: cytosol, nuclear chromatin, nucleus; EXPRESSED IN: 19 plant structures; EXPRESSED DURING: 10 growth stages; CONTAINS Inter…
1 (47.64-49.04)	DTF-1.4, GDD-1.4, eGDD-1.4	LD3, LD6, SD2, SD3	Phvul.001G232400	AT3G48670	IDN2		Encodes IDN2 (INVOLVED IN DE NOVO 2), a double-stranded RNA-binding protein involved in de novo methylation and small interfering RNA (siRNA)-mediated maintenance methylation. IND2 is a component of the RNA-directed DNA methylation pathway.INVOLVED IN DE NOVO 2 (IDN2); FUNCTIONS IN: molecular_function unknown; INVOLVED IN: response to cadmium ion, chromatin silencing, DNA methylation; LOCATED IN:…
1 (47.64-49.04)	DTF-1.4, GDD-1.4, eGDD-1.4	LD3, LD6, SD2, SD3	Phvul.001G232000	AT2G43980	ITPK4		inositol 1,3,4-trisphosphate 5/6-kinase 4'' (ITPK4); FUNCTIONS IN: magnesium ion binding, inositol-1,3,4-trisphosphate 5/6-kinase activity, catalytic activity, ATP binding, inositol tetrakisphosphate 1-kinase activity; INVOLVED IN: inositol trisphosphate metabolic process; LOCATED IN: intracellular; EXPRESSED IN: 22 plant structures; EXPRESSED DURING: 13 growth stages; CONTAINS InterPro DOMAIN/s:…
1 (47.64-49.04)	DTF-1.4, GDD-1.4, eGDD-1.4	LD3, LD6, SD2, SD3	Phvul.001G227900	AT5G16560	KAN		Encodes a KANADI protein (KAN) that regulates organ polarity in Arabidopsis. KAN is required for abaxial identity in both leaves and carpels, and encodes a nuclear-localized protein in the GARP family of putative transcription factors. Together with KAN2, this gene appears to be involved in the development of the carpel and the outer integument of the ovule.Along with KAN2 and KAN4, KAN1 appears …
1 (47.64-49.04)	DTF-1.4, GDD-1.4, eGDD-1.4	LD3, LD6, SD2, SD3	Phvul.001G226700		KIFC2_3		K10406 - kinesin family member C2/C3 (KIFC2_3)
1 (47.64-49.04)	DTF-1.4, GDD-1.4, eGDD-1.4	LD3, LD6, SD2, SD3	Phvul.001G227500	AT5G48910	LPA66		Encodes LPA66, a chloroplast protein of the pentatricopeptide repeat family. In lpa66 mutants, editing of psbF that converts serine to phenylalanine is specifically impaired. lpa66 mutants also display a high chlorophyll fluorescence phenotype.LOW PSII ACCUMULATION 66 (LPA66); CONTAINS InterPro DOMAIN/s: Pentatricopeptide repeat (InterPro:IPR002885); BEST Arabidopsis thaliana protein match is: Te…
1 (47.64-49.04)	DTF-1.4, GDD-1.4, eGDD-1.4	LD3, LD6, SD2, SD3	Phvul.001G223100		MAN		K19355 - mannan endo-1,4-beta-mannosidase (MAN)
1 (47.64-49.04)	DTF-1.4, GDD-1.4, eGDD-1.4	LD3, LD6, SD2, SD3	Phvul.001G227200	AT1G56260	MDO1		unknown protein;
1 (47.64-49.04)	DTF-1.4, GDD-1.4, eGDD-1.4	LD3, LD6, SD2, SD3	Phvul.001G228000	AT5G16550	MQK4_30		voltage-dependent L-type calcium channel subunit. unknown protein; Has 30201 Blast hits to 17322 proteins in 780 species: Archae - 12; Bacteria - 1396; Metazoa - 17338; Fungi - 3422; Plants - 5037; Viruses - 0; Other Eukaryotes - 2996 (source: NCBI BLink).
1 (47.64-49.04)	DTF-1.4, GDD-1.4, eGDD-1.4	LD3, LD6, SD2, SD3	Phvul.001G229900	AT1G66230	MYB20		myb domain protein 20 (MYB20); CONTAINS InterPro DOMAIN/s: SANT, DNA-binding (InterPro:IPR001005), Homeodomain-like (InterPro:IPR009057), Myb, DNA-binding (InterPro:IPR014778), HTH transcriptional regulator, Myb-type, DNA-binding (InterPro:IPR017930), Homeodomain-related (InterPro:IPR012287), Myb transcription factor (InterPro:IPR015495); BEST Arabidopsis thaliana protein match is: myb domain pro…
1 (47.64-49.04)	DTF-1.4, GDD-1.4, eGDD-1.4	LD3, LD6, SD2, SD3	Phvul.001G221500	AT1G09540	MYB61		Encodes putative transcription factor. Mutants lack of mucilage extrusion from the seeds during imbibition. Reduced quantities of mucilage are deposited during the development of the seed coat epidermis in myb61 mutants. Expressed in guard cells,loss of function mutations show an increase in stomatal pore opening suggesting a role in ABA independent regulation of stomatal pore size.myb domain pro…
1 (47.64-49.04)	DTF-1.4, GDD-1.4, eGDD-1.4	LD3, LD6, SD2, SD3	Phvul.001G225000	AT1G09240	NAS3		nicotianamine synthase 3 (NAS3); CONTAINS InterPro DOMAIN/s: Nicotianamine synthase (InterPro:IPR004298); BEST Arabidopsis thaliana protein match is: nicotianamine synthase 4 (TAIR:AT1G56430.1); Has 198 Blast hits to 195 proteins in 46 species: Archae - 20; Bacteria - 10; Metazoa - 0; Fungi - 20; Plants - 147; Viruses - 0; Other Eukaryotes - 1 (source: NCBI BLink).
1 (47.64-49.04)	DTF-1.4, GDD-1.4, eGDD-1.4	LD3, LD6, SD2, SD3	Phvul.001G236900	AT2G39800	P5CS1	Expressed in flower	encodes a delta1-pyrroline-5-carboxylate synthase that catalyzes the rate-limiting enzyme in the biosynthesis of proline. Gene is expressed in reproductive organs and tissues under non-stress conditions but in the whole plant under water-limiting condition. Expression is also induced by abscisic acid and salt stress in a light-dependent manner. encodes a delta1-pyrroline-5-carboxylate synthase th…
1 (47.64-49.04)	DTF-1.4, GDD-1.4, eGDD-1.4	LD3, LD6, SD2, SD3	Phvul.001G225600		PDIA6		K09584 - protein disulfide-isomerase A6 (PDIA6, TXNDC7)
1 (47.64-49.04)	DTF-1.4, GDD-1.4, eGDD-1.4	LD3, LD6, SD2, SD3	Phvul.001G229800	AT5G37660	PDLP7		Encodes a plasmodesmal protein that may be involved in the intercellular movement of molecules through the plasmodesmata. The protein has two DUF26 domains and a single transmembrane domain. plasmodesmata-located protein 7 (PDLP7); CONTAINS InterPro DOMAIN/s: Protein of unknown function DUF26 (InterPro:IPR002902); BEST Arabidopsis thaliana protein match is: plasmodesmata-located protein 6 (TAIR:A…
1 (47.64-49.04)	DTF-1.4, GDD-1.4, eGDD-1.4	LD3, LD6, SD2, SD3	Phvul.001G221100	AT1G09570	PHYA	Photoperiod	Light-labile cytoplasmic red/far-red light photoreceptor involved in the regulation of photomorphogenesis. It exists in two inter-convertible forms: Pr and Pfr (active) and functions as a dimer.The N terminus carries a single tetrapyrrole chromophore, and the C terminus is involved in dimerization. It is the sole photoreceptor mediating the FR high irradiance response (HIR). Major regulator in re…
1 (47.64-49.04)	DTF-1.4, GDD-1.4, eGDD-1.4	LD3, LD6, SD2, SD3	Phvul.001G236000	AT3G11410	PP2CA	Expressed in seeds	Encodes protein phosphatase 2C. Negative regulator of ABA signalling. Expressed in seeds during germination. mRNA up-regulated by drought and ABA.protein phosphatase 2CA (PP2CA); FUNCTIONS IN: protein binding, protein serine/threonine phosphatase activity, phosphoprotein phosphatase activity; INVOLVED IN: in 6 processes; LOCATED IN: protein serine/threonine phosphatase complex; EXPRESSED IN: 26 p…
1 (47.64-49.04)	DTF-1.4, GDD-1.4, eGDD-1.4	LD3, LD6, SD2, SD3	Phvul.001G224100	AT4G15510	PPD1		A nuclear-encoded thylakoid lumenal protein that is associated with photosystem I (PSI) but is not an integral subunit of PSI. It is an PSI assembly factor that assists the proper folding and integration of PsaB and PsaA into the thylakoid membrane. It is involved in the assembly of PSI reaction center heterodimer core.Photosystem II reaction center PsbP family protein; FUNCTIONS IN: calcium ion …
1 (47.64-49.04)	DTF-1.4, GDD-1.4, eGDD-1.4	LD3, LD6, SD2, SD3	Phvul.001G230700	AT5G39790	PTST		Encodes a chloroplast localized protein with starch binding activity that may be involved in carbohydrate metabolism. PROTEIN TARGETING TO STARCH (PTST). 5'-AMP-activated protein kinase-related; BEST Arabidopsis thaliana protein match is: 5'-AMP-activated protein kinase-related (TAIR:AT1G27070.1); Has 35333 Blast hits to 34131 proteins in 2444 species: Archae - 798; Bacteria - 22429; Metazoa - 97…
1 (47.64-49.04)	DTF-1.4, GDD-1.4, eGDD-1.4	LD3, LD6, SD2, SD3	Phvul.001G234500	AT1G74260	PUR4	Flower development	Encodes formylglycinamidine ribonucleotide synthase an enzyme involved in de novo purine biosynthesis. PUR4 is localizes to the chloroplast and mitochondria. Loss of PUR4 function affects male but not female gametophyte development. purine biosynthesis 4 (PUR4); FUNCTIONS IN: phosphoribosylformylglycinamidine synthase activity, catalytic activity, ATP binding; INVOLVED IN: microgametogenesis, pol…
1 (47.64-49.04)	DTF-1.4, GDD-1.4, eGDD-1.4	LD3, LD6, SD2, SD3	Phvul.001G221700	AT3G05880	RCI2A		Induced by low temperatures, dehydration and salt stress and ABA. Encodes a small (54 amino acids), highly hydrophobic protein that bears two potential transmembrane domains.RARE-COLD-INDUCIBLE 2A (RCI2A); CONTAINS InterPro DOMAIN/s: Uncharacterised protein family UPF0057 (InterPro:IPR000612); BEST Arabidopsis thaliana protein match is: Low temperature and salt responsive protein family (TAIR:AT3…
1 (47.64-49.04)	DTF-1.4, GDD-1.4, eGDD-1.4	LD3, LD6, SD2, SD3	Phvul.001G233700	AT2G39720	RHC2A		RING-H2 finger C2A (RHC2A); FUNCTIONS IN: zinc ion binding; EXPRESSED IN: 24 plant structures; EXPRESSED DURING: 15 growth stages; CONTAINS InterPro DOMAIN/s: Zinc finger, RING-type (InterPro:IPR001841), Zinc finger, C3HC4 RING-type (InterPro:IPR018957), Protein of unknown function DUF1117 (InterPro:IPR010543); BEST Arabidopsis thaliana protein match is: zinc finger (C3HC4-type RING finger) famil…
1 (47.64-49.04)	DTF-1.4, GDD-1.4, eGDD-1.4	LD3, LD6, SD2, SD3	Phvul.001G231500	AT1G66470	RHD6		ROOT HAIR DEFECTIVE6 (RHD6); CONTAINS InterPro DOMAIN/s: Helix-loop-helix DNA-binding domain (InterPro:IPR001092), Helix-loop-helix DNA-binding (InterPro:IPR011598); BEST Arabidopsis thaliana protein match is: RHD SIX-LIKE 1 (TAIR:AT5G37800.1);
1 (47.64-49.04)	DTF-1.4, GDD-1.4, eGDD-1.4	LD3, LD6, SD2, SD3	Phvul.001G230900	AT3G28956	Rpb4		RNA polymerase II, Rpb4, core protein; FUNCTIONS IN: DNA-directed RNA polymerase activity, nucleotide binding, catalytic activity; INVOLVED IN: cellular metabolic process, transcription; LOCATED IN: cellular_component unknown; CONTAINS InterPro DOMAIN/s: HRDC-like (InterPro:IPR010997), RNA polymerase II, Rpb4 (InterPro:IPR005574), RNA polymerase II, Rpb4, core (InterPro:IPR006590); BEST Arabidops…
1 (47.64-49.04)	DTF-1.4, GDD-1.4, eGDD-1.4	LD3, LD6, SD2, SD3	Phvul.001G224300		RTF1		K15178 - RNA polymerase-associated protein RTF1 (RTF1)
1 (47.64-49.04)	DTF-1.4, GDD-1.4, eGDD-1.4	LD3, LD6, SD2, SD3	Phvul.001G222800	AT1G02500	SAM1		encodes a S-adenosylmethionine synthetase. SAM1 is regulated by protein S-nitrosylation. The covalent binding of nitric oxide (NO) to the Cys114 residue inhibits the enzyme activity. S-adenosylmethionine synthetase 1 (SAM1); FUNCTIONS IN: methionine adenosyltransferase activity; INVOLVED IN: response to cadmium ion, response to salt stress, ethylene biosynthetic process, S-adenosylmethionine bios…
1 (47.64-49.04)	DTF-1.4, GDD-1.4, eGDD-1.4	LD3, LD6, SD2, SD3	Phvul.001G233500	AT3G55530	SDIR1		Encodes an intracellular membrane localized protein with E3 ligase activity that is involved in regulation of ABA signaling. Loss of function alleles show decreased sensitivity to ABA. Overexpression results in increased sensitivity to ABA. SALT- AND DROUGHT-INDUCED RING FINGER1 (SDIR1); CONTAINS InterPro DOMAIN/s: Zinc finger, RING-type (InterPro:IPR001841), Zinc finger, C3HC4 RING-type (InterPr…
1 (47.64-49.04)	DTF-1.4, GDD-1.4, eGDD-1.4	LD3, LD6, SD2, SD3	Phvul.001G226500		SF178		PTHR10071//PTHR10071:SF178 - TRANSCRIPTION FACTOR GATA GATA BINDING FACTOR // SUBFAMILY NOT NAMED
1 (47.64-49.04)	DTF-1.4, GDD-1.4, eGDD-1.4	LD3, LD6, SD2, SD3	Phvul.001G232200	AT5G37850	SOS4		Encodes a pyridoxal kinase required for root hair development. Mutants are hypersensitive to Na+, K+ and Li+. SALT OVERLY SENSITIVE 4 (SOS4); FUNCTIONS IN: pyridoxal kinase activity, kinase activity; INVOLVED IN: pyridoxine biosynthetic process, hyperosmotic salinity response, trichoblast differentiation, pyridoxal 5'-phosphate salvage; EXPRESSED IN: 23 plant structures; EXPRESSED DURING: 14 grow…
1 (47.64-49.04)	DTF-1.4, GDD-1.4, eGDD-1.4	LD3, LD6, SD2, SD3	Phvul.001G227000	AT5G27030	TPR3		TOPLESS-related 3 (TPR3); FUNCTIONS IN: protein binding; INVOLVED IN: primary shoot apical meristem specification; LOCATED IN: endomembrane system; CONTAINS InterPro DOMAIN/s: WD40 repeat 2 (InterPro:IPR019782), WD40 repeat, conserved site (InterPro:IPR019775), WD40 repeat (InterPro:IPR001680), CTLH, C-terminal LisH motif (InterPro:IPR006595), WD40 repeat-like-containing domain (InterPro:IPR01104…
1 (47.64-49.04)	DTF-1.4, GDD-1.4, eGDD-1.4	LD3, LD6, SD2, SD3	Phvul.001G227700	AT5G37478	TPX2		TPX2 (targeting protein for Xklp2) protein family; CONTAINS InterPro DOMAIN/s: Xklp2 targeting protein (InterPro:IPR009675); BEST Arabidopsis thaliana protein match is: TPX2 (targeting protein for Xklp2) protein family (TAIR:AT3G01015.1); Has 159 Blast hits to 159 proteins in 22 species: Archae - 0; Bacteria - 0; Metazoa - 11; Fungi - 0; Plants - 142; Viruses - 0; Other Eukaryotes - 6 (source: NC…
1 (47.64-49.04)	DTF-1.4, GDD-1.4, eGDD-1.4	LD3, LD6, SD2, SD3	Phvul.001G232700	AT3G12560	TRFL9		TRF-like 9 (TRFL9); CONTAINS InterPro DOMAIN/s: SANT, DNA-binding (InterPro:IPR001005), Homeodomain-like (InterPro:IPR009057), HTH transcriptional regulator, Myb-type, DNA-binding (InterPro:IPR017930), Homeodomain-related (InterPro:IPR012287); BEST Arabidopsis thaliana protein match is: telomeric DNA binding protein 1 (TAIR:AT5G13820.1); Has 334 Blast hits to 327 proteins in 39 species: Archae - …
1 (47.64-49.04)	DTF-1.4, GDD-1.4, eGDD-1.4	LD3, LD6, SD2, SD3	Phvul.001G225800	AT3G05750	TRM6		serine-rich adhesin for platelets-like protein. unknown protein; FUNCTIONS IN: molecular_function unknown; INVOLVED IN: biological_process unknown; LOCATED IN: membrane; EXPRESSED IN: 17 plant structures; EXPRESSED DURING: 10 growth stages; BEST Arabidopsis thaliana protein match is: unknown protein (TAIR:AT5G26910.1); Has 2317 Blast hits to 1467 proteins in 247 species: Archae - 4; Bacteria - 75…
1 (47.64-49.04)	DTF-1.4, GDD-1.4, eGDD-1.4	LD3, LD6, SD2, SD3	Phvul.001G223600	AT1G09380	UMAMIT25		nodulin MtN21 /EamA-like transporter family protein; LOCATED IN: endomembrane system, membrane; EXPRESSED IN: 15 plant structures; EXPRESSED DURING: 4 anthesis, C globular stage, petal differentiation and expansion stage, LP.08 eight leaves visible; CONTAINS InterPro DOMAIN/s: Protein of unknown function DUF6, transmembrane (InterPro:IPR000620); BEST Arabidopsis thaliana protein match is: nodulin…
1 (47.64-49.04)	DTF-1.4, GDD-1.4, eGDD-1.4	LD3, LD6, SD2, SD3	Phvul.001G225300		Usp		PF00582 - Universal stress protein family (Usp)
1 (47.64-49.04)	DTF-1.4, GDD-1.4, eGDD-1.4	LD3, LD6, SD2, SD3	Phvul.001G235000	AT2G37740	ZFP10		zinc-finger protein 10 (ZFP10); FUNCTIONS IN: sequence-specific DNA binding transcription factor activity, zinc ion binding, nucleic acid binding; INVOLVED IN: regulation of transcription; LOCATED IN: intracellular; EXPRESSED IN: root; CONTAINS InterPro DOMAIN/s: Zinc finger, C2H2-like (InterPro:IPR015880), Zinc finger, C2H2-type (InterPro:IPR007087); BEST Arabidopsis thaliana protein match is: C…
1 (47.64-49.04)	DTF-1.4, GDD-1.4, eGDD-1.4	LD3, LD6, SD2, SD3	Phvul.001G228400	AT1G66140	ZFP4		zinc finger protein 4 (ZFP4); FUNCTIONS IN: sequence-specific DNA binding transcription factor activity, zinc ion binding, nucleic acid binding; INVOLVED IN: regulation of transcription; LOCATED IN: intracellular; EXPRESSED IN: 14 plant structures; EXPRESSED DURING: 8 growth stages; CONTAINS InterPro DOMAIN/s: Zinc finger, C2H2-type (InterPro:IPR007087); BEST Arabidopsis thaliana protein match is…
1 (47.64-49.04)	DTF-1.4, GDD-1.4, eGDD-1.4	LD3, LD6, SD2, SD3	Phvul.001G224000	AT1G56590	ZIP4		ZIG SUPPRESSOR 4 (ZIP4); INVOLVED IN: intracellular protein transport, gravitropism, protein targeting to vacuole; LOCATED IN: clathrin vesicle coat, clathrin adaptor complex; EXPRESSED IN: 23 plant structures; EXPRESSED DURING: 15 growth stages; CONTAINS InterPro DOMAIN/s: Clathrin adaptor, mu subunit, conserved site (InterPro:IPR018240), Clathrin adaptor, mu subunit (InterPro:IPR001392), Clathr…
1 (47.64-49.04)	DTF-1.4, GDD-1.4, eGDD-1.4	LD3, LD6, SD2, SD3	Phvul.001G225500	AT3G05760			C2H2 and C2HC zinc fingers superfamily protein; FUNCTIONS IN: zinc ion binding, nucleic acid binding; INVOLVED IN: biological_process unknown; EXPRESSED IN: 24 plant structures; EXPRESSED DURING: 15 growth stages; CONTAINS InterPro DOMAIN/s: Zinc finger, U1-type (InterPro:IPR003604), Zinc finger, double-stranded RNA binding (InterPro:IPR022755)
1 (47.64-49.04)	DTF-1.4, GDD-1.4, eGDD-1.4	LD3, LD6, SD2, SD3	Phvul.001G225200	AT1G56350			Peptide chain release factor 2; FUNCTIONS IN: translation release factor activity, codon specific, translation release factor activity; INVOLVED IN: translational termination; LOCATED IN: cytoplasm; EXPRESSED IN: 22 plant structures; EXPRESSED DURING: 13 growth stages; CONTAINS InterPro DOMAIN/s: Class I peptide chain release factor (InterPro:IPR000352), Peptide chain release factor 2 (InterPro:I…
1 (47.64-49.04)	DTF-1.4, GDD-1.4, eGDD-1.4	LD3, LD6, SD2, SD3	Phvul.001G226300	AT1G56300			Chaperone DnaJ-domain superfamily protein; FUNCTIONS IN: heat shock protein binding; INVOLVED IN: protein folding, response to cyclopentenone; LOCATED IN: cellular_component unknown; EXPRESSED IN: 23 plant structures; EXPRESSED DURING: 15 growth stages; CONTAINS InterPro DOMAIN/s: Molecular chaperone, heat shock protein, Hsp40, DnaJ (InterPro:IPR015609), Heat shock protein DnaJ, N-terminal (Inter…
1 (47.64-49.04)	DTF-1.4, GDD-1.4, eGDD-1.4	LD3, LD6, SD2, SD3	Phvul.001G222500	AT1G09460			Carbohydrate-binding X8 domain superfamily protein; LOCATED IN: endomembrane system; EXPRESSED IN: 19 plant structures; EXPRESSED DURING: 12 growth stages; CONTAINS InterPro DOMAIN/s: X8 (InterPro:IPR012946); BEST Arabidopsis thaliana protein match is: Carbohydrate-binding X8 domain superfamily protein (TAIR:AT2G30933.1); Has 28400 Blast hits to 14800 proteins in 1032 species: Archae - 269; Bacte…
1 (47.64-49.04)	DTF-1.4, GDD-1.4, eGDD-1.4	LD3, LD6, SD2, SD3	Phvul.001G223500	AT1G09390		Metabolic process	GDSL-like Lipase/Acylhydrolase superfamily protein; FUNCTIONS IN: hydrolase activity, acting on ester bonds, carboxylesterase activity; INVOLVED IN: glycerol biosynthetic process, lipid metabolic process; LOCATED IN: chloroplast stroma; EXPRESSED IN: 22 plant structures; EXPRESSED DURING: 13 growth stages; CONTAINS InterPro DOMAIN/s: Lipase, GDSL (InterPro:IPR001087); BEST Arabidopsis thaliana pr…
1 (47.64-49.04)	DTF-1.4, GDD-1.4, eGDD-1.4	LD3, LD6, SD2, SD3	Phvul.001G229400	AT1G66190			unknown protein;
1 (47.64-49.04)	DTF-1.4, GDD-1.4, eGDD-1.4	LD3, LD6, SD2, SD3	Phvul.001G229200	AT1G66180			FUNCTIONS IN: aspartic-type endopeptidase activity; INVOLVED IN: proteolysis; LOCATED IN: endomembrane system; EXPRESSED IN: 22 plant structures; EXPRESSED DURING: 13 growth stages; CONTAINS InterPro DOMAIN/s: Peptidase aspartic (InterPro:IPR021109), Peptidase aspartic, catalytic (InterPro:IPR009007), Peptidase A1 (InterPro:IPR001461); BEST Arabidopsis thaliana protein match is: Eukaryotic aspart…
1 (47.64-49.04)	DTF-1.4, GDD-1.4, eGDD-1.4	LD3, LD6, SD2, SD3	Phvul.001G227100	AT3G05640			Protein phosphatase 2C family protein; FUNCTIONS IN: protein serine/threonine phosphatase activity, catalytic activity; INVOLVED IN: response to water deprivation; LOCATED IN: cellular_component unknown; EXPRESSED IN: 22 plant structures; EXPRESSED DURING: 13 growth stages; CONTAINS InterPro DOMAIN/s: Protein phosphatase 2C-related (InterPro:IPR001932), Protein phosphatase 2C (InterPro:IPR015655)…
1 (47.64-49.04)	DTF-1.4, GDD-1.4, eGDD-1.4	LD3, LD6, SD2, SD3	Phvul.001G236500	AT3G55580			Regulator of chromosome condensation (RCC1) family protein; CONTAINS InterPro DOMAIN/s: Regulator of chromosome condensation/beta-lactamase-inhibitor protein II (InterPro:IPR009091), Regulator of chromosome condensation, RCC1 (InterPro:IPR000408); BEST Arabidopsis thaliana protein match is: Regulator of chromosome condensation (RCC1) family protein (TAIR:AT3G53830.1); Has 20178 Blast hits to 6212…
1 (47.64-49.04)	DTF-1.4, GDD-1.4, eGDD-1.4	LD3, LD6, SD2, SD3	Phvul.001G222700	AT1G56720			Protein kinase superfamily protein; FUNCTIONS IN: protein serine/threonine kinase activity, protein kinase activity, kinase activity, ATP binding; INVOLVED IN: protein amino acid phosphorylation; LOCATED IN: cellular_component unknown; EXPRESSED IN: 23 plant structures; EXPRESSED DURING: 13 growth stages; CONTAINS InterPro DOMAIN/s: Protein kinase, ATP binding site (InterPro:IPR017441), Protein k…
1 (47.64-49.04)	DTF-1.4, GDD-1.4, eGDD-1.4	LD3, LD6, SD2, SD3	Phvul.001G223200	AT1G56700			Peptidase C15, pyroglutamyl peptidase I-like; INVOLVED IN: proteolysis; LOCATED IN: cellular_component unknown; EXPRESSED IN: 23 plant structures; EXPRESSED DURING: 13 growth stages; CONTAINS InterPro DOMAIN/s: Peptidase C15, pyroglutamyl peptidase I (InterPro:IPR000816), Peptidase C15, pyroglutamyl peptidase I-like (InterPro:IPR016125); BEST Arabidopsis thaliana protein match is: Peptidase C15, …
1 (47.64-49.04)	DTF-1.4, GDD-1.4, eGDD-1.4	LD3, LD6, SD2, SD3	Phvul.001G231200	AT1G66460			Protein kinase superfamily protein; FUNCTIONS IN: protein serine/threonine kinase activity, protein kinase activity, kinase activity, ATP binding; INVOLVED IN: protein amino acid phosphorylation; LOCATED IN: cellular_component unknown; EXPRESSED IN: 6 plant structures; EXPRESSED DURING: 4 anthesis, petal differentiation and expansion stage; CONTAINS InterPro DOMAIN/s: Protein kinase, catalytic do…
1 (47.64-49.04)	DTF-1.4, GDD-1.4, eGDD-1.4	LD3, LD6, SD2, SD3	Phvul.001G232100	AT1G66480		Light perception	plastid movement impaired 2 (PMI2); FUNCTIONS IN: molecular_function unknown; INVOLVED IN: response to blue light, N-terminal protein myristoylation, chloroplast avoidance movement; LOCATED IN: plasma membrane; EXPRESSED IN: 17 plant structures; EXPRESSED DURING: 9 growth stages; BEST Arabidopsis thaliana protein match is: unknown protein (TAIR:AT5G37840.1);
1 (47.64-49.04)	DTF-1.4, GDD-1.4, eGDD-1.4	LD3, LD6, SD2, SD3	Phvul.001G229100	AT5G16940			carbon-sulfur lyases; FUNCTIONS IN: carbon-sulfur lyase activity; INVOLVED IN: metabolic process; LOCATED IN: cellular_component unknown; EXPRESSED IN: 22 plant structures; EXPRESSED DURING: 13 growth stages; CONTAINS InterPro DOMAIN/s: Glutathione-dependent formaldehyde-activating, GFA (InterPro:IPR006913); Has 2298 Blast hits to 2296 proteins in 492 species: Archae - 0; Bacteria - 969; Metazoa …
1 (47.64-49.04)	DTF-1.4, GDD-1.4, eGDD-1.4	LD3, LD6, SD2, SD3	Phvul.001G221400	AT3G05910			Pectinacetylesterase family protein; FUNCTIONS IN: carboxylesterase activity; INVOLVED IN: biological_process unknown; LOCATED IN: endomembrane system; EXPRESSED IN: 22 plant structures; EXPRESSED DURING: 13 growth stages; CONTAINS InterPro DOMAIN/s: Pectinacetylesterase (InterPro:IPR004963); BEST Arabidopsis thaliana protein match is: Pectinacetylesterase family protein (TAIR:AT5G26670.1
1 (47.64-49.04)	DTF-1.4, GDD-1.4, eGDD-1.4	LD3, LD6, SD2, SD3	Phvul.001G235900	AT1G15250			Zinc-binding ribosomal protein family protein; FUNCTIONS IN: structural constituent of ribosome; INVOLVED IN: translation, ribosome biogenesis; LOCATED IN: ribosome, cytosolic large ribosomal subunit; EXPRESSED IN: 20 plant structures; EXPRESSED DURING: 13 growth stages; CONTAINS InterPro DOMAIN/s: Ribosomal protein L37e, conserved site (InterPro:IPR018267), Ribosomal protein, zinc-binding domain…
1 (47.64-49.04)	DTF-1.4, GDD-1.4, eGDD-1.4	LD3, LD6, SD2, SD3	Phvul.001G230100	AT5G37710			alpha/beta-Hydrolases superfamily protein; FUNCTIONS IN: triglyceride lipase activity, calmodulin binding; INVOLVED IN: lipid catabolic process, lipid metabolic process; LOCATED IN: plasma membrane; EXPRESSED IN: 22 plant structures; EXPRESSED DURING: 13 growth stages; CONTAINS InterPro DOMAIN/s: Lipase, class 3 (InterPro:IPR002921), Mono-/di-acylglycerol lipase, N-terminal (InterPro:IPR005592); …
1 (47.64-49.04)	DTF-1.4, GDD-1.4, eGDD-1.4	LD3, LD6, SD2, SD3	Phvul.001G229300	AT5G37590			Tetratricopeptide repeat (TPR)-like superfamily protein; FUNCTIONS IN: binding; INVOLVED IN: biological_process unknown; LOCATED IN: cellular_component unknown; EXPRESSED IN: 17 plant structures; EXPRESSED DURING: 9 growth stages; CONTAINS InterPro DOMAIN/s: Tetratricopeptide-like helical (InterPro:IPR011990), Tetratricopeptide repeat-containing (InterPro:IPR013026), Tetratricopeptide repeat (Int…
1 (47.64-49.04)	DTF-1.4, GDD-1.4, eGDD-1.4	LD3, LD6, SD2, SD3	Phvul.001G234800	AT5G06060			NAD(P)-binding Rossmann-fold superfamily protein; FUNCTIONS IN: oxidoreductase activity, binding, catalytic activity; INVOLVED IN: oxidation reduction, metabolic process; EXPRESSED IN: 23 plant structures; EXPRESSED DURING: 14 growth stages; CONTAINS InterPro DOMAIN/s: Short-chain dehydrogenase/reductase, conserved site (InterPro:IPR020904), NAD(P)-binding domain (InterPro:IPR016040), Glucose/rib…
1 (47.64-49.04)	DTF-1.4, GDD-1.4, eGDD-1.4	LD3, LD6, SD2, SD3	Phvul.001G235700	AT5G06060			NAD(P)-binding Rossmann-fold superfamily protein; FUNCTIONS IN: oxidoreductase activity, binding, catalytic activity; INVOLVED IN: oxidation reduction, metabolic process; EXPRESSED IN: 23 plant structures; EXPRESSED DURING: 14 growth stages; CONTAINS InterPro DOMAIN/s: Short-chain dehydrogenase/reductase, conserved site (InterPro:IPR020904), NAD(P)-binding domain (InterPro:IPR016040), Glucose/rib…
1 (47.64-49.04)	DTF-1.4, GDD-1.4, eGDD-1.4	LD3, LD6, SD2, SD3	Phvul.001G235800	AT5G06060			NAD(P)-binding Rossmann-fold superfamily protein; FUNCTIONS IN: oxidoreductase activity, binding, catalytic activity; INVOLVED IN: oxidation reduction, metabolic process; EXPRESSED IN: 23 plant structures; EXPRESSED DURING: 14 growth stages; CONTAINS InterPro DOMAIN/s: Short-chain dehydrogenase/reductase, conserved site (InterPro:IPR020904), NAD(P)-binding domain (InterPro:IPR016040), Glucose/rib…
1 (47.64-49.04)	DTF-1.4, GDD-1.4, eGDD-1.4	LD3, LD6, SD2, SD3	Phvul.001G228900	AT3G05230			Signal peptidase subunit; FUNCTIONS IN: peptidase activity; INVOLVED IN: signal peptide processing; LOCATED IN: endoplasmic reticulum, cell wall; EXPRESSED IN: 26 plant structures; EXPRESSED DURING: 13 growth stages; CONTAINS InterPro DOMAIN/s: Signal peptidase 22kDa subunit (InterPro:IPR007653); BEST Arabidopsis thaliana protein match is: Signal peptidase subunit (TAIR:AT5G27430.1); Has 35333 Bl…
1 (47.64-49.04)	DTF-1.4, GDD-1.4, eGDD-1.4	LD3, LD6, SD2, SD3	Phvul.001G226800	AT1G09160			Protein phosphatase 2C family protein; FUNCTIONS IN: protein serine/threonine phosphatase activity, catalytic activity; LOCATED IN: plasma membrane; EXPRESSED IN: 23 plant structures; EXPRESSED DURING: 13 growth stages; CONTAINS InterPro DOMAIN/s: Protein phosphatase 2C-related (InterPro:IPR001932), Protein phosphatase 2C (InterPro:IPR015655), Protein phosphatase 2C, N-terminal (InterPro:IPR01404…
1 (47.64-49.04)	DTF-1.4, GDD-1.4, eGDD-1.4	LD3, LD6, SD2, SD3	Phvul.001G235600	AT2G44920			Tetratricopeptide repeat (TPR)-like superfamily protein; FUNCTIONS IN: molecular_function unknown; LOCATED IN: thylakoid, thylakoid lumen, chloroplast thylakoid membrane, chloroplast thylakoid lumen, chloroplast; EXPRESSED IN: 24 plant structures; EXPRESSED DURING: 13 growth stages; CONTAINS InterPro DOMAIN/s: Pentapeptide repeat (InterPro:IPR001646); BEST Arabidopsis thaliana protein match is: P…
1 (47.64-49.04)	DTF-1.4, GDD-1.4, eGDD-1.4	LD3, LD6, SD2, SD3	Phvul.001G232500	AT4G39670			Glycolipid transfer protein (GLTP) family protein; FUNCTIONS IN: glycolipid transporter activity, glycolipid binding; INVOLVED IN: glycolipid transport; LOCATED IN: cytoplasm; EXPRESSED IN: 16 plant structures; EXPRESSED DURING: 10 growth stages; CONTAINS InterPro DOMAIN/s: Glycolipid transfer protein, GLTP (InterPro:IPR014830); BEST Arabidopsis thaliana protein match is: Glycolipid transfer prot…
1 (47.64-49.04)	DTF-1.4, GDD-1.4, eGDD-1.4	LD3, LD6, SD2, SD3	Phvul.001G233000	AT1G67520			lectin protein kinase family protein; FUNCTIONS IN: in 6 functions; INVOLVED IN: protein amino acid phosphorylation; LOCATED IN: endomembrane system; CONTAINS InterPro DOMAIN/s: Curculin-like (mannose-binding) lectin (InterPro:IPR001480), PAN-2 domain (InterPro:IPR013227), Apple-like (InterPro:IPR003609), Serine/threonine-protein kinase domain (InterPro:IPR002290), Serine/threonine-protein kinase…
1 (47.64-49.04)	DTF-1.4, GDD-1.4, eGDD-1.4	LD3, LD6, SD2, SD3	Phvul.001G233100	AT1G67520			lectin protein kinase family protein; FUNCTIONS IN: in 6 functions; INVOLVED IN: protein amino acid phosphorylation; LOCATED IN: endomembrane system; CONTAINS InterPro DOMAIN/s: Curculin-like (mannose-binding) lectin (InterPro:IPR001480), PAN-2 domain (InterPro:IPR013227), Apple-like (InterPro:IPR003609), Serine/threonine-protein kinase domain (InterPro:IPR002290), Serine/threonine-protein kinase…
1 (47.64-49.04)	DTF-1.4, GDD-1.4, eGDD-1.4	LD3, LD6, SD2, SD3	Phvul.001G231600	AT3G03440			ARM repeat superfamily protein; FUNCTIONS IN: binding; INVOLVED IN: biological_process unknown; LOCATED IN: chloroplast; EXPRESSED IN: 18 plant structures; EXPRESSED DURING: 13 growth stages; CONTAINS InterPro DOMAIN/s: Armadillo-like helical (InterPro:IPR011989), Armadillo (InterPro:IPR000225), Armadillo-type fold (InterPro:IPR016024); BEST Arabidopsis thaliana protein match is: ARM repeat super…
1 (47.64-49.04)	DTF-1.4, GDD-1.4, eGDD-1.4	LD3, LD6, SD2, SD3	Phvul.001G231100	AT3G03430		Expressed in flower	Calcium-binding EF-hand family protein; FUNCTIONS IN: calcium ion binding; INVOLVED IN: biological_process unknown; LOCATED IN: cytoplasm; EXPRESSED IN: 9 plant structures; EXPRESSED DURING: L mature pollen stage, M germinated pollen stage, 4 anthesis, C globular stage, petal differentiation and expansion stage; CONTAINS InterPro DOMAIN/s: EF-Hand 1, calcium-binding site (InterPro:IPR018247), EF-…
1 (47.64-49.04)	DTF-1.4, GDD-1.4, eGDD-1.4	LD3, LD6, SD2, SD3	Phvul.001G236300	AT2G39750			S-adenosyl-L-methionine-dependent methyltransferases superfamily protein; CONTAINS InterPro DOMAIN/s: Protein of unknown function DUF248, methyltransferase putative (InterPro:IPR004159); BEST Arabidopsis thaliana protein match is: Putative methyltransferase family protein (TAIR:AT5G06050.1); Has 1633 Blast hits to 1528 proteins in 174 species: Archae - 2; Bacteria - 140; Metazoa - 223; Fungi - 78…
1 (47.64-49.04)	DTF-1.4, GDD-1.4, eGDD-1.4	LD3, LD6, SD2, SD3	Phvul.001G227800	AT1G02410			cytochrome c oxidase assembly protein CtaG / Cox11 family; FUNCTIONS IN: copper ion binding; INVOLVED IN: biological_process unknown; EXPRESSED IN: 24 plant structures; EXPRESSED DURING: 15 growth stages; CONTAINS InterPro DOMAIN/s: Cytochrome c oxidase assembly protein CtaG/Cox11 (InterPro:IPR007533); Has 2749 Blast hits to 2749 proteins in 659 species: Archae - 0; Bacteria - 997; Metazoa - 98; …
1 (47.64-49.04)	DTF-1.4, GDD-1.4, eGDD-1.4	LD3, LD6, SD2, SD3	Phvul.001G230200	AT1G66260			RNA-binding (RRM/RBD/RNP motifs) family protein; FUNCTIONS IN: nucleotide binding, nucleic acid binding; INVOLVED IN: biological_process unknown; LOCATED IN: cellular_component unknown; EXPRESSED IN: 24 plant structures; EXPRESSED DURING: 15 growth stages; CONTAINS InterPro DOMAIN/s: RNA recognition motif, RNP-1 (InterPro:IPR000504), Nucleotide-binding, alpha-beta plait (InterPro:IPR012677); BEST…
1 (47.64-49.04)	DTF-1.4, GDD-1.4, eGDD-1.4	LD3, LD6, SD2, SD3	Phvul.001G230000	AT1G66250			O-Glycosyl hydrolases family 17 protein; FUNCTIONS IN: cation binding, hydrolase activity, hydrolyzing O-glycosyl compounds, catalytic activity; INVOLVED IN: carbohydrate metabolic process; LOCATED IN: anchored to plasma membrane, plasma membrane, anchored to membrane; EXPRESSED IN: 22 plant structures; EXPRESSED DURING: 13 growth stages; CONTAINS InterPro DOMAIN/s: X8 (InterPro:IPR012946), Glyco…
1 (47.64-49.04)	DTF-1.4, GDD-1.4, eGDD-1.4	LD3, LD6, SD2, SD3	Phvul.001G224700	AT1G56500			haloacid dehalogenase-like hydrolase family protein; FUNCTIONS IN: hydrolase activity, oxidoreductase activity, catalytic activity; INVOLVED IN: metabolic process, cell redox homeostasis; LOCATED IN: chloroplast, chloroplast stroma; EXPRESSED IN: 23 plant structures; EXPRESSED DURING: 14 growth stages; CONTAINS InterPro DOMAIN/s: Haloacid dehydrogenase/epoxide hydrolase (InterPro:IPR005833), Low-…
1 (47.64-49.04)	DTF-1.4, GDD-1.4, eGDD-1.4	LD3, LD6, SD2, SD3	Phvul.001G237000	AT2G39805			Integral membrane Yip1 family protein; FUNCTIONS IN: molecular_function unknown; INVOLVED IN: biological_process unknown; LOCATED IN: membrane; CONTAINS InterPro DOMAIN/s: Yip1 domain (InterPro:IPR006977); BEST Arabidopsis thaliana protein match is: Integral membrane Yip1 family protein (TAIR:AT5G27490.1); Has 446 Blast hits to 445 proteins in 164 species: Archae - 0; Bacteria - 0; Metazoa - 176;…
1 (47.64-49.04)	DTF-1.4, GDD-1.4, eGDD-1.4	LD3, LD6, SD2, SD3	Phvul.001G231901	AT3G03341			cold-regulated protein. unknown protein; Has 30201 Blast hits to 17322 proteins in 780 species: Archae - 12; Bacteria - 1396; Metazoa - 17338; Fungi - 3422; Plants - 5037; Viruses - 0; Other Eukaryotes - 2996 (source: NCBI BLink).
1 (47.64-49.04)	DTF-1.4, GDD-1.4, eGDD-1.4	LD3, LD6, SD2, SD3	Phvul.001G235100	AT3G11420			Protein of unknown function (DUF604); CONTAINS InterPro DOMAIN/s: Protein of unknown function DUF604 (InterPro:IPR006740); BEST Arabidopsis thaliana protein match is: Protein of unknown function (DUF604) (TAIR:AT2G37730.1); Has 709 Blast hits to 698 proteins in 110 species: Archae - 0; Bacteria - 0; Metazoa - 213; Fungi - 200; Plants - 281; Viruses - 0; Other Eukaryotes - 15 (source: NCBI BLink).
1 (47.64-49.04)	DTF-1.4, GDD-1.4, eGDD-1.4	LD3, LD6, SD2, SD3	Phvul.001G235500	AT3G25910			MAP kinase kinase kinase, putative (DUF1644). FUNCTIONS IN: zinc ion binding; INVOLVED IN: biological_process unknown; LOCATED IN: intracellular; EXPRESSED IN: 23 plant structures; EXPRESSED DURING: 15 growth stages; CONTAINS InterPro DOMAIN/s: Zinc finger, C2H2-like (InterPro:IPR015880), Protein of unknown function DUF1644 (InterPro:IPR012866); BEST Arabidopsis thaliana protein match is: Protein…
1 (47.64-49.04)	DTF-1.4, GDD-1.4, eGDD-1.4	LD3, LD6, SD2, SD3	Phvul.001G227600	AT3G51270			protein serine/threonine kinases;ATP binding;catalytics; FUNCTIONS IN: protein serine/threonine kinase activity, catalytic activity, ATP binding; INVOLVED IN: protein amino acid phosphorylation; LOCATED IN: cellular_component unknown; EXPRESSED IN: 21 plant structures; EXPRESSED DURING: 13 growth stages; CONTAINS InterPro DOMAIN/s: RIO-like kinase (InterPro:IPR018934), RIO kinase (InterPro:IPR000…
1 (47.64-49.04)	DTF-1.4, GDD-1.4, eGDD-1.4	LD3, LD6, SD2, SD3	Phvul.001G228700	AT3G52640			Zn-dependent exopeptidases superfamily protein; INVOLVED IN: protein processing; LOCATED IN: plasma membrane, vacuole; EXPRESSED IN: 24 plant structures; EXPRESSED DURING: 13 growth stages; CONTAINS InterPro DOMAIN/s: Nicastrin (InterPro:IPR008710); Has 35333 Blast hits to 34131 proteins in 2444 species: Archae - 798; Bacteria - 22429; Metazoa - 974; Fungi - 991; Plants - 531; Viruses - 0; Other …
1 (47.64-49.04)	DTF-1.4, GDD-1.4, eGDD-1.4	LD3, LD6, SD2, SD3	Phvul.001G233400	AT3G55520			FKBP-like peptidyl-prolyl cis-trans isomerase family protein; FUNCTIONS IN: FK506 binding, peptidyl-prolyl cis-trans isomerase activity; INVOLVED IN: protein folding; LOCATED IN: chloroplast thylakoid lumen; EXPRESSED IN: 23 plant structures; EXPRESSED DURING: 13 growth stages; CONTAINS InterPro DOMAIN/s: Peptidyl-prolyl cis-trans isomerase, FKBP-type (InterPro:IPR001179); BEST Arabidopsis thalia…
1 (47.64-49.04)	DTF-1.4, GDD-1.4, eGDD-1.4	LD3, LD6, SD2, SD3	Phvul.001G222300	AT3G62200			Putative endonuclease or glycosyl hydrolase; BEST Arabidopsis thaliana protein match is: putative endonuclease or glycosyl hydrolase with C2H2-type zinc finger domain (TAIR:AT5G61190.1); Has 3997 Blast hits to 3396 proteins in 338 species: Archae - 0; Bacteria - 122; Metazoa - 1660; Fungi - 937; Plants - 691; Viruses - 43; Other Eukaryotes - 544 (source: NCBI BLink).
1 (47.64-49.04)	DTF-1.4, GDD-1.4, eGDD-1.4	LD3, LD6, SD2, SD3	Phvul.001G225700	AT3G62630			stress response NST1-like protein (DUF1645). Protein of unknown function (DUF1645); CONTAINS InterPro DOMAIN/s: Protein of unknown function DUF1645 (InterPro:IPR012442); BEST Arabidopsis thaliana protein match is: Protein of unknown function (DUF1645) (TAIR:AT2G15760.1); Has 309 Blast hits to 289 proteins in 68 species: Archae - 3; Bacteria - 16; Metazoa - 56; Fungi - 10; Plants - 169; Viruses - …
1 (47.64-49.04)	DTF-1.4, GDD-1.4, eGDD-1.4	LD3, LD6, SD2, SD3	Phvul.001G222200	AT5G26600			Pyridoxal phosphate (PLP)-dependent transferases superfamily protein; FUNCTIONS IN: pyridoxal phosphate binding, catalytic activity; INVOLVED IN: metabolic process; LOCATED IN: chloroplast; EXPRESSED IN: 22 plant structures; EXPRESSED DURING: 13 growth stages; CONTAINS InterPro DOMAIN/s: Pyridoxal phosphate-dependent transferase, major domain (InterPro:IPR015424), Aminotransferase, class V/Cystei…
1 (47.64-49.04)	DTF-1.4, GDD-1.4, eGDD-1.4	LD3, LD6, SD2, SD3	Phvul.001G221300				PTHR11654//PTHR11654:SF110 - OLIGOPEPTIDE TRANSPORTER-RELATED // SUBFAMILY NOT NAMED
1 (47.64-49.04)	DTF-1.4, GDD-1.4, eGDD-1.4	LD3, LD6, SD2, SD3	Phvul.001G221600				PF01535//PF13041//PF14432 - PPR repeat (PPR) // PPR repeat family (PPR_2) // DYW family of nucleic acid deaminases (DYW_deaminase)
1 (47.64-49.04)	DTF-1.4, GDD-1.4, eGDD-1.4	LD3, LD6, SD2, SD3	Phvul.001G221800
1 (47.64-49.04)	DTF-1.4, GDD-1.4, eGDD-1.4	LD3, LD6, SD2, SD3	Phvul.001G221900
1 (47.64-49.04)	DTF-1.4, GDD-1.4, eGDD-1.4	LD3, LD6, SD2, SD3	Phvul.001G222100				PTHR13683//PTHR13683:SF312 - ASPARTYL PROTEASES // SUBFAMILY NOT NAMED
1 (47.64-49.04)	DTF-1.4, GDD-1.4, eGDD-1.4	LD3, LD6, SD2, SD3	Phvul.001G222400
1 (47.64-49.04)	DTF-1.4, GDD-1.4, eGDD-1.4	LD3, LD6, SD2, SD3	Phvul.001G223400				PF15699 - NPR1 interacting (NPR1_interact)
1 (47.64-49.04)	DTF-1.4, GDD-1.4, eGDD-1.4	LD3, LD6, SD2, SD3	Phvul.001G224200				PF12899 - Alkaline and neutral invertase (Glyco_hydro_100)
1 (47.64-49.04)	DTF-1.4, GDD-1.4, eGDD-1.4	LD3, LD6, SD2, SD3	Phvul.001G224400				PF04398 - Protein of unknown function, DUF538 (DUF538)
1 (47.64-49.04)	DTF-1.4, GDD-1.4, eGDD-1.4	LD3, LD6, SD2, SD3	Phvul.001G224500				PTHR23316:SF17 - IMPORTIN SUBUNIT ALPHA
1 (47.64-49.04)	DTF-1.4, GDD-1.4, eGDD-1.4	LD3, LD6, SD2, SD3	Phvul.001G224800				PTHR23244//PTHR23244:SF294 - KELCH REPEAT DOMAIN // SUBFAMILY NOT NAMED
1 (47.64-49.04)	DTF-1.4, GDD-1.4, eGDD-1.4	LD3, LD6, SD2, SD3	Phvul.001G224900				PTHR11850//PTHR11850:SF102 - HOMEOBOX PROTEIN TRANSCRIPTION FACTORS // SUBFAMILY NOT NAMED
1 (47.64-49.04)	DTF-1.4, GDD-1.4, eGDD-1.4	LD3, LD6, SD2, SD3	Phvul.001G225100
1 (47.64-49.04)	DTF-1.4, GDD-1.4, eGDD-1.4	LD3, LD6, SD2, SD3	Phvul.001G225400				PTHR11711//PTHR11711:SF194 - ADP RIBOSYLATION FACTOR-RELATED // SUBFAMILY NOT NAMED
1 (47.64-49.04)	DTF-1.4, GDD-1.4, eGDD-1.4	LD3, LD6, SD2, SD3	Phvul.001G225900				PF12023 - Domain of unknown function (DUF3511) (DUF3511)
1 (47.64-49.04)	DTF-1.4, GDD-1.4, eGDD-1.4	LD3, LD6, SD2, SD3	Phvul.001G226000				PF07887 - Calmodulin binding protein-like (Calmodulin_bind)
1 (47.64-49.04)	DTF-1.4, GDD-1.4, eGDD-1.4	LD3, LD6, SD2, SD3	Phvul.001G226100				PF07887 - Calmodulin binding protein-like (Calmodulin_bind)
1 (47.64-49.04)	DTF-1.4, GDD-1.4, eGDD-1.4	LD3, LD6, SD2, SD3	Phvul.001G226200				PF07887 - Calmodulin binding protein-like (Calmodulin_bind)
1 (47.64-49.04)	DTF-1.4, GDD-1.4, eGDD-1.4	LD3, LD6, SD2, SD3	Phvul.001G226400				PTHR23316:SF22 - ARMADILLO/BETA-CATENIN-LIKE REPEATS-CONTAINING PROTEIN-RELATED
1 (47.64-49.04)	DTF-1.4, GDD-1.4, eGDD-1.4	LD3, LD6, SD2, SD3	Phvul.001G226900				PF13947 - Wall-associated receptor kinase galacturonan-binding (GUB_WAK_bind)
1 (47.64-49.04)	DTF-1.4, GDD-1.4, eGDD-1.4	LD3, LD6, SD2, SD3	Phvul.001G227300				PTHR32468:SF26 - CATION/H(+) ANTIPORTER 16
1 (47.64-49.04)	DTF-1.4, GDD-1.4, eGDD-1.4	LD3, LD6, SD2, SD3	Phvul.001G227400
1 (47.64-49.04)	DTF-1.4, GDD-1.4, eGDD-1.4	LD3, LD6, SD2, SD3	Phvul.001G228100				PTHR22604:SF132 - NAD(P)-BINDING ROSSMANN-FOLD SUPERFAMILY PROTEIN
1 (47.64-49.04)	DTF-1.4, GDD-1.4, eGDD-1.4	LD3, LD6, SD2, SD3	Phvul.001G228200				PTHR10527:SF5 - FI07923P
1 (47.64-49.04)	DTF-1.4, GDD-1.4, eGDD-1.4	LD3, LD6, SD2, SD3	Phvul.001G229700				PTHR12629//PTHR12629:SF14 - DIPHOSPHOINOSITOL POLYPHOSPHATE PHOSPHOHYDROLASE // SUBFAMILY NOT NAMED
1 (47.64-49.04)	DTF-1.4, GDD-1.4, eGDD-1.4	LD3, LD6, SD2, SD3	Phvul.001G230500				K14494 - DELLA protein (DELLA)
1 (47.64-49.04)	DTF-1.4, GDD-1.4, eGDD-1.4	LD3, LD6, SD2, SD3	Phvul.001G230600
1 (47.64-49.04)	DTF-1.4, GDD-1.4, eGDD-1.4	LD3, LD6, SD2, SD3	Phvul.001G230800				PTHR23180//PTHR23180:SF285 - CENTAURIN/ARF // SUBFAMILY NOT NAMED
1 (47.64-49.04)	DTF-1.4, GDD-1.4, eGDD-1.4	LD3, LD6, SD2, SD3	Phvul.001G231300				PF01535//PF13041 - PPR repeat (PPR) // PPR repeat family (PPR_2)
1 (47.64-49.04)	DTF-1.4, GDD-1.4, eGDD-1.4	LD3, LD6, SD2, SD3	Phvul.001G231400				PTHR11207//PTHR11207:SF8 - RIBONUCLEASE III // SUBFAMILY NOT NAMED
1 (47.64-49.04)	DTF-1.4, GDD-1.4, eGDD-1.4	LD3, LD6, SD2, SD3	Phvul.001G231800				2.7.11.1 - Non-specific serine/threonine protein kinase / Threonine-specific protein kinase
1 (47.64-49.04)	DTF-1.4, GDD-1.4, eGDD-1.4	LD3, LD6, SD2, SD3	Phvul.001G232300				2.7.10.2//2.7.11.1 - Non-specific protein-tyrosine kinase / Cytoplasmic protein tyrosine kinase // Non-specific serine/threonine protein kinase / Threonine-specific protein kinase
1 (47.64-49.04)	DTF-1.4, GDD-1.4, eGDD-1.4	LD3, LD6, SD2, SD3	Phvul.001G232600				PTHR31867:SF9 - EXPANSIN-A7
1 (47.64-49.04)	DTF-1.4, GDD-1.4, eGDD-1.4	LD3, LD6, SD2, SD3	Phvul.001G233200
1 (47.64-49.04)	DTF-1.4, GDD-1.4, eGDD-1.4	LD3, LD6, SD2, SD3	Phvul.001G233900				PTHR24078:SF177 - PROTEIN DNJ-23-RELATED
1 (47.64-49.04)	DTF-1.4, GDD-1.4, eGDD-1.4	LD3, LD6, SD2, SD3	Phvul.001G234000				PF00314 - Thaumatin family (Thaumatin)
1 (47.64-49.04)	DTF-1.4, GDD-1.4, eGDD-1.4	LD3, LD6, SD2, SD3	Phvul.001G234200				PTHR27007:SF27 - L-TYPE LECTIN-DOMAIN CONTAINING RECEPTOR KINASE S.5
1 (47.64-49.04)	DTF-1.4, GDD-1.4, eGDD-1.4	LD3, LD6, SD2, SD3	Phvul.001G234300				KOG0651 - 26S proteasome regulatory complex, ATPase RPT5
1 (47.64-49.04)	DTF-1.4, GDD-1.4, eGDD-1.4	LD3, LD6, SD2, SD3	Phvul.001G234400
1 (47.64-49.04)	DTF-1.4, GDD-1.4, eGDD-1.4	LD3, LD6, SD2, SD3	Phvul.001G234700
1 (47.64-49.04)	DTF-1.4, GDD-1.4, eGDD-1.4	LD3, LD6, SD2, SD3	Phvul.001G234900				PTHR24322:SF354 - TROPINONE REDUCTASE-RELATED
1 (47.64-49.04)	DTF-1.4, GDD-1.4, eGDD-1.4	LD3, LD6, SD2, SD3	Phvul.001G235200
1 (47.64-49.04)	DTF-1.4, GDD-1.4, eGDD-1.4	LD3, LD6, SD2, SD3	Phvul.001G235400				PTHR10663//PTHR10663:SF131 - GUANYL-NUCLEOTIDE EXCHANGE FACTOR // SUBFAMILY NOT NAMED
1 (47.64-49.04)	DTF-1.4, GDD-1.4, eGDD-1.4	LD3, LD6, SD2, SD3	Phvul.001G236200
1 (47.64-49.04)	DTF-1.4, GDD-1.4, eGDD-1.4	LD3, LD6, SD2, SD3	Phvul.001G236600				PF07714//PF13947 - Protein tyrosine kinase (Pkinase_Tyr) // Wall-associated receptor kinase galacturonan-binding (GUB_WAK_bind)
1 (47.64-49.04)	DTF-1.4, GDD-1.4, eGDD-1.4	LD3, LD6, SD2, SD3	Phvul.001G236700				PF02298 - Plastocyanin-like domain (Cu_bind_like)
1 (47.64-49.04)	DTF-1.4, GDD-1.4, eGDD-1.4	LD3, LD6, SD2, SD3	Phvul.001G237200				PTHR11654//PTHR11654:SF128 - OLIGOPEPTIDE TRANSPORTER-RELATED // SUBFAMILY NOT NAMED
4 (4.11-5.86)	DFT-4.1, GDD-4.1, CLASS-4.1, PS-4.1, PRI-4.1, RRP-4.1	All LD, SD1, SD4, all seasons	Phvul.004G046200	AT3G22910	ACA13		ATPase E1-E2 type family protein / haloacid dehalogenase-like hydrolase family protein; FUNCTIONS IN: calcium-transporting ATPase activity, calmodulin binding; INVOLVED IN: cation transport, calcium ion transport, metabolic process, ATP biosynthetic process; LOCATED IN: membrane; EXPRESSED IN: 12 plant structures; EXPRESSED DURING: LP.04 four leaves visible, 4 anthesis, C globular stage, petal di…
4 (4.11-5.86)	DFT-4.1, GDD-4.1, CLASS-4.1, PS-4.1, PRI-4.1, RRP-4.1	All LD, SD1, SD4, all seasons	Phvul.004G045400	AT1G19920	APS2		APS2; FUNCTIONS IN: sulfate adenylyltransferase (ATP) activity; INVOLVED IN: sulfate assimilation; LOCATED IN: chloroplast; EXPRESSED IN: 25 plant structures; EXPRESSED DURING: 13 growth stages; CONTAINS InterPro DOMAIN/s: Rossmann-like alpha/beta/alpha sandwich fold (InterPro:IPR014729), Pseudouridine synthase/archaeosine transglycosylase-like (InterPro:IPR015947), Sulphate adenylyltransferase (…
4 (4.11-5.86)	DFT-4.1, GDD-4.1, CLASS-4.1, PS-4.1, PRI-4.1, RRP-4.1	All LD, SD1, SD4, all seasons	Phvul.004G044700	AT5G49550	BLOS2		Putative homolog of mammalian BLOC-1 Subunit 2. Protein - protein interaction with BLOS1. biogenesis of lysosome organelles complex 1 subunit-like protein. CONTAINS InterPro DOMAIN/s: Biogenesis of lysosome-related organelles complex-1, subunit 2 (InterPro:IPR019269); Has 30201 Blast hits to 17322 proteins in 780 species: Archae - 12; Bacteria - 1396; Metazoa - 17338; Fungi - 3422; Plants - 5037;…
4 (4.11-5.86)	DFT-4.1, GDD-4.1, CLASS-4.1, PS-4.1, PRI-4.1, RRP-4.1	All LD, SD1, SD4, all seasons	Phvul.004G041700	AT3G30180	BR6OX2		Encodes a cytochrome p450 enzyme that catalyzes the last reaction in the production of brassinolide. It is capable of converting 6-deoxocastasterone into castasterone, a C-6 oxidation, as well as the further conversion of castasterone into brassinolide by a Baeyer-Villinger oxidation reaction at C-6, resulting in the formation of an unusual seven-membered lactone ring. The enzyme possesses high a…
4 (4.11-5.86)	DFT-4.1, GDD-4.1, CLASS-4.1, PS-4.1, PRI-4.1, RRP-4.1	All LD, SD1, SD4, all seasons	Phvul.004G045800	AT3G30530	bZIP42		basic leucine-zipper 42 (bZIP42); FUNCTIONS IN: DNA binding, protein homodimerization activity, protein heterodimerization activity, sequence-specific DNA binding transcription factor activity; INVOLVED IN: regulation of transcription, DNA-dependent; EXPRESSED IN: inflorescence meristem, flower; EXPRESSED DURING: petal differentiation and expansion stage; CONTAINS InterPro DOMAIN/s: Basic-leucine…
4 (4.11-5.86)	DFT-4.1, GDD-4.1, CLASS-4.1, PS-4.1, PRI-4.1, RRP-4.1	All LD, SD1, SD4, all seasons	Phvul.004G046601	AT3G02380	COL2	Photoperiod, circadian clock	homologous to the flowering-time gene CONSTANS (CO) encoding zinc-finger proteins. CONSTANS-like 2 (COL2); FUNCTIONS IN: sequence-specific DNA binding transcription factor activity, zinc ion binding; INVOLVED IN: regulation of flower development; LOCATED IN: intracellular; EXPRESSED IN: 20 plant structures; EXPRESSED DURING: 13 growth stages; CONTAINS InterPro DOMAIN/s: CCT domain (InterPro:IPR01…
4 (4.11-5.86)	DFT-4.1, GDD-4.1, CLASS-4.1, PS-4.1, PRI-4.1, RRP-4.1	All LD, SD1, SD4, all seasons	Phvul.004G043800	AT5G15730	CRLK2		Protein kinase superfamily protein; FUNCTIONS IN: protein serine/threonine kinase activity, protein kinase activity, kinase activity, ATP binding; INVOLVED IN: protein amino acid phosphorylation; LOCATED IN: endomembrane system; EXPRESSED IN: 23 plant structures; EXPRESSED DURING: 13 growth stages; CONTAINS InterPro DOMAIN/s: Protein kinase, catalytic domain (InterPro:IPR000719), Serine/threonine…
4 (4.11-5.86)	DFT-4.1, GDD-4.1, CLASS-4.1, PS-4.1, PRI-4.1, RRP-4.1	All LD, SD1, SD4, all seasons	Phvul.004G037200	AT5G39210	CRR7		Encodes a protein of the chloroplastic NAD(P)H dehydrogenase complex (NDH Complex) involved in respiration, photosystem I (PSI) cyclic electron transport and CO2 uptake. The product of this gene appears to be essential for the stable formation of the NDH Complex. CHLORORESPIRATORY REDUCTION 7 (CRR7); FUNCTIONS IN: molecular_function unknown; INVOLVED IN: NAD(P)H dehydrogenase complex assembly; LO…
4 (4.11-5.86)	DFT-4.1, GDD-4.1, CLASS-4.1, PS-4.1, PRI-4.1, RRP-4.1	All LD, SD1, SD4, all seasons	Phvul.004G045900	AT3G02350	GAUT9		Encodes a protein with putative galacturonosyltransferase activity.galacturonosyltransferase 9 (GAUT9); CONTAINS InterPro DOMAIN/s: Glycosyl transferase, family 8 (InterPro:IPR002495); BEST Arabidopsis thaliana protein match is: Nucleotide-diphospho-sugar transferases superfamily protein (TAIR:AT3G25140.1); Has 1426 Blast hits to 1422 proteins in 244 species: Archae - 0; Bacteria - 444; Metazoa -…
4 (4.11-5.86)	DFT-4.1, GDD-4.1, CLASS-4.1, PS-4.1, PRI-4.1, RRP-4.1	All LD, SD1, SD4, all seasons	Phvul.004G044100	AT1G74310	HSP101		Encodes ClpB1, which belongs to the Casein lytic proteinase/heat shock protein 100 (Clp/Hsp100) family. Involved in refolding of proteins which form aggregates under heat stress. Also known as AtHsp101. AtHsp101 is a cytosolic heat shock protein required for acclimation to high temperature.heat shock protein 101 (HSP101); FUNCTIONS IN: protein binding, ATPase activity, ATP binding; INVOLVED IN: r…
4 (4.11-5.86)	DFT-4.1, GDD-4.1, CLASS-4.1, PS-4.1, PRI-4.1, RRP-4.1	All LD, SD1, SD4, all seasons	Phvul.004G041400	AT5G15630	IRX6		Encodes a member of the COBRA family, similar to phytochelatin synthetase. Involved in secondary cell wall biosynthesis. Mutants make smaller plants with reduced levels of cellulose and cell wall sugars.IRREGULAR XYLEM 6 (IRX6); INVOLVED IN: secondary cell wall biogenesis; LOCATED IN: plasma membrane, anchored to membrane; EXPRESSED IN: 21 plant structures; EXPRESSED DURING: 12 growth stages; CON…
4 (4.11-5.86)	DFT-4.1, GDD-4.1, CLASS-4.1, PS-4.1, PRI-4.1, RRP-4.1	All LD, SD1, SD4, all seasons	Phvul.004G044500	AT5G40530	MNF13_4		S-adenosyl-L-methionine-dependent methyltransferases superfamily protein; CONTAINS InterPro DOMAIN/s: Methyltransferase-related (InterPro:IPR007823); Has 408 Blast hits to 408 proteins in 202 species: Archae - 3; Bacteria - 0; Metazoa - 110; Fungi - 140; Plants - 48; Viruses - 0; Other Eukaryotes - 107 (source: NCBI BLink).
4 (4.11-5.86)	DFT-4.1, GDD-4.1, CLASS-4.1, PS-4.1, PRI-4.1, RRP-4.1	All LD, SD1, SD4, all seasons	Phvul.004G046000	AT3G08500	MYB83		myb domain protein 83 (MYB83); CONTAINS InterPro DOMAIN/s: SANT, DNA-binding (InterPro:IPR001005), Homeodomain-like (InterPro:IPR009057), Myb, DNA-binding (InterPro:IPR014778), HTH transcriptional regulator, Myb-type, DNA-binding (InterPro:IPR017930), Homeodomain-related (InterPro:IPR012287), Myb transcription factor (InterPro:IPR015495); BEST Arabidopsis thaliana protein match is: myb domain pro…
4 (4.11-5.86)	DFT-4.1, GDD-4.1, CLASS-4.1, PS-4.1, PRI-4.1, RRP-4.1	All LD, SD1, SD4, all seasons	Phvul.004G037700	AT3G02150	PTF1	Leaf development	a chloroplast trans-acting factor of the psbD light-responsive promoter.TCP gene involved in heterochronic control of leaf differentiation.plastid transcription factor 1 (PTF1); FUNCTIONS IN: sequence-specific DNA binding transcription factor activity; INVOLVED IN: cell differentiation, positive regulation of development, heterochronic, regulation of transcription, leaf morphogenesis; LOCATED IN:…
4 (4.11-5.86)	DFT-4.1, GDD-4.1, CLASS-4.1, PS-4.1, PRI-4.1, RRP-4.1	All LD, SD1, SD4, all seasons	Phvul.004G038700	AT4G20050	QRT3		Encodes a polygalacturonase that plays a direct role in degrading the pollen mother cell wall during microspore development.QUARTET 3 (QRT3); FUNCTIONS IN: polygalacturonase activity; INVOLVED IN: microsporogenesis, pollen exine formation; LOCATED IN: endomembrane system; EXPRESSED IN: 16 plant structures; EXPRESSED DURING: 7 growth stages; CONTAINS InterPro DOMAIN/s: Pectin lyase fold/virulence …
4 (4.11-5.86)	DFT-4.1, GDD-4.1, CLASS-4.1, PS-4.1, PRI-4.1, RRP-4.1	All LD, SD1, SD4, all seasons	Phvul.004G041600	AT3G02230	RGP1	Expressed in flower	RGP1 is a UDP-arabinose mutase that catalyzes the interconversion between the pyranose and furanose forms of UDP-L-arabinose. It appears to be required for proper cell wall formation. rgp1/rgp2 (at5g15650) double mutants have a male gametophyte lethal phenotype. RGP1 fusion proteins can be found in the cytosol and peripherally associated with the Golgi apparatus.reversibly glycosylated polypeptid…
4 (4.11-5.86)	DFT-4.1, GDD-4.1, CLASS-4.1, PS-4.1, PRI-4.1, RRP-4.1	All LD, SD1, SD4, all seasons	Phvul.004G037500	AT1G69270	RPK1		receptor-like protein kinase 1 (RPK1); CONTAINS InterPro DOMAIN/s: Protein kinase, ATP binding site (InterPro:IPR017441), Protein kinase, catalytic domain (InterPro:IPR000719), Leucine-rich repeat-containing N-terminal domain, type 2 (InterPro:IPR013210), Serine/threonine-protein kinase-like domain (InterPro:IPR017442), Protein kinase-like domain (InterPro:IPR011009), Serine/threonine-protein kin…
4 (4.11-5.86)	DFT-4.1, GDD-4.1, CLASS-4.1, PS-4.1, PRI-4.1, RRP-4.1	All LD, SD1, SD4, all seasons	Phvul.004G037600	AT3G02130	RPK2	Meristem development	Encodes a receptor-like kinase RPK2 (also known as TOADSTOOL 2/TOAD2). Functions as a regulator of meristem maintenance. Mutants are insensitive to synthetic CLV3 peptide. Mutations in the RPK2 also result in stem cell expansion and increased number of floral organs, as seen in the other clv mutants. Forms homo-oligomers.receptor-like protein kinase 2 (RPK2); FUNCTIONS IN: protein serine/threonin…
4 (4.11-5.86)	DFT-4.1, GDD-4.1, CLASS-4.1, PS-4.1, PRI-4.1, RRP-4.1	All LD, SD1, SD4, all seasons	Phvul.004G042300	AT3G02310	SEP2	Flower development	MADS-box protein, binds K domain of AG in vivo. SEPALLATA 2 (SEP2); FUNCTIONS IN: protein binding, DNA binding, sequence-specific DNA binding transcription factor activity; INVOLVED IN: flower development, ovule development; LOCATED IN: nucleus; EXPRESSED IN: 12 plant structures; EXPRESSED DURING: 7 growth stages; CONTAINS InterPro DOMAIN/s: Transcription factor, MADS-box (InterPro:IPR002100), Tr…
4 (4.11-5.86)	DFT-4.1, GDD-4.1, CLASS-4.1, PS-4.1, PRI-4.1, RRP-4.1	All LD, SD1, SD4, all seasons	Phvul.004G038000	AT1G26355	SP1L1		SPIRAL1-LIKE1 belongs to a six-member gene family in Arabidopsis; all members share a high sequence similarity in amino- and carboxy-terminal regions. GUS expression was detected only in pollen; however, no endogenous transcript was found.SPIRAL1-like1 (SP1L1); BEST Arabidopsis thaliana protein match is: SPIRAL1-like2 (TAIR:AT1G69230.2); Has 30201 Blast hits to 17322 proteins in 780 species: Arch…
4 (4.11-5.86)	DFT-4.1, GDD-4.1, CLASS-4.1, PS-4.1, PRI-4.1, RRP-4.1	All LD, SD1, SD4, all seasons	Phvul.004G035400	AT5G15550			Transducin/WD40 repeat-like superfamily protein; FUNCTIONS IN: nucleotide binding; INVOLVED IN: biological_process unknown; LOCATED IN: nucleolus, CUL4 RING ubiquitin ligase complex, heterotrimeric G-protein complex; EXPRESSED IN: 21 plant structures; EXPRESSED DURING: 13 growth stages; CONTAINS InterPro DOMAIN/s: WD40 repeat 2 (InterPro:IPR019782), WD40 repeat, conserved site (InterPro:IPR019775…
4 (4.11-5.86)	DFT-4.1, GDD-4.1, CLASS-4.1, PS-4.1, PRI-4.1, RRP-4.1	All LD, SD1, SD4, all seasons	Phvul.004G044000	AT4G02750	T5J8_5		Tetratricopeptide repeat (TPR)-like superfamily protein; LOCATED IN: mitochondrion; EXPRESSED IN: 16 plant structures; EXPRESSED DURING: 7 growth stages; CONTAINS InterPro DOMAIN/s: Pentatricopeptide repeat (InterPro:IPR002885); BEST Arabidopsis thaliana protein match is: pentatricopeptide (PPR) repeat-containing protein (TAIR:AT1G09410.1); Has 56089 Blast hits to 14902 proteins in 275 species: A…
4 (4.11-5.86)	DFT-4.1, GDD-4.1, CLASS-4.1, PS-4.1, PRI-4.1, RRP-4.1	All LD, SD1, SD4, all seasons	Phvul.004G045500	AT5G11390	WIT1		Encodes one of the WPP domain-interacting proteins (WIT1/AT5G11390, WIT2/AT1G68910) required for RanGAP nuclear envelope association in root tip cells. Ran GTPase plays essential roles in multiple cellular processes, including nucleocytoplasmic transport, spindle formation, and postmitotic nuclear envelope reassembly. The cytoplasmic Ran GTPase activating protein RanGAP is critical to establish a…
4 (4.11-5.86)	DFT-4.1, GDD-4.1, CLASS-4.1, PS-4.1, PRI-4.1, RRP-4.1	All LD, SD1, SD4, all seasons	Phvul.004G041500	AT3G02320			N2,N2-dimethylguanosine tRNA methyltransferase; FUNCTIONS IN: RNA binding, tRNA (guanine-N2-)-methyltransferase activity; INVOLVED IN: tRNA processing; LOCATED IN: cellular_component unknown; EXPRESSED IN: 15 plant structures; EXPRESSED DURING: 6 growth stages; CONTAINS InterPro DOMAIN/s: N2,N2-dimethylguanosine tRNA methyltransferase (InterPro:IPR002905); BEST Arabidopsis thaliana protein match …
4 (4.11-5.86)	DFT-4.1, GDD-4.1, CLASS-4.1, PS-4.1, PRI-4.1, RRP-4.1	All LD, SD1, SD4, all seasons	Phvul.004G045600	AT3G02340			RING/U-box superfamily protein; FUNCTIONS IN: zinc ion binding; EXPRESSED IN: 24 plant structures; EXPRESSED DURING: 15 growth stages; CONTAINS InterPro DOMAIN/s: Zinc finger, RING-type (InterPro:IPR001841); BEST Arabidopsis thaliana protein match is: RING/U-box superfamily protein (TAIR:AT5G15820.1); Has 9104 Blast hits to 9081 proteins in 277 species: Archae - 2; Bacteria - 2; Metazoa - 2595; F…
4 (4.11-5.86)	DFT-4.1, GDD-4.1, CLASS-4.1, PS-4.1, PRI-4.1, RRP-4.1	All LD, SD1, SD4, all seasons	Phvul.004G036400	AT1G55030			RNI-like superfamily protein; CONTAINS InterPro DOMAIN/s: FBD (InterPro:IPR013596), F-box domain, cyclin-like (InterPro:IPR001810), FBD-like (InterPro:IPR006566), Leucine-rich repeat 2 (InterPro:IPR013101); BEST Arabidopsis thaliana protein match is: F-box/RNI-like/FBD-like domains-containing protein (TAIR:AT3G52680.2);
4 (4.11-5.86)	DFT-4.1, GDD-4.1, CLASS-4.1, PS-4.1, PRI-4.1, RRP-4.1	All LD, SD1, SD4, all seasons	Phvul.004G042600	AT5G15780			Pollen Ole e 1 allergen and extensin family protein; FUNCTIONS IN: molecular_function unknown; INVOLVED IN: biological_process unknown; LOCATED IN: endomembrane system; EXPRESSED IN: 14 plant structures; EXPRESSED DURING: 10 growth stages; CONTAINS InterPro DOMAIN/s: Pollen Ole e 1 allergen/extensin (InterPro:IPR006041); Has 85252 Blast hits to 38354 proteins in 1825 species: Archae - 258; Bacter…
4 (4.11-5.86)	DFT-4.1, GDD-4.1, CLASS-4.1, PS-4.1, PRI-4.1, RRP-4.1	All LD, SD1, SD4, all seasons	Phvul.004G041200	AT5G15640			Mitochondrial substrate carrier family protein; FUNCTIONS IN: binding; INVOLVED IN: transport, mitochondrial transport, transmembrane transport; LOCATED IN: mitochondrion, mitochondrial inner membrane; EXPRESSED IN: 24 plant structures; EXPRESSED DURING: 15 growth stages; CONTAINS InterPro DOMAIN/s: Mitochondrial carrier protein (InterPro:IPR002067), Mitochondrial substrate carrier (InterPro:IPR0…
4 (4.11-5.86)	DFT-4.1, GDD-4.1, CLASS-4.1, PS-4.1, PRI-4.1, RRP-4.1	All LD, SD1, SD4, all seasons	Phvul.004G045000	AT5G15680			ARM repeat superfamily protein; FUNCTIONS IN: binding; INVOLVED IN: biological_process unknown; LOCATED IN: plasma membrane, membrane; EXPRESSED IN: 23 plant structures; EXPRESSED DURING: 12 growth stages; CONTAINS InterPro DOMAIN/s: Armadillo-type fold (InterPro:IPR016024); Has 30201 Blast hits to 17322 proteins in 780 species: Archae - 12; Bacteria - 1396; Metazoa - 17338; Fungi - 3422; Plants …
4 (4.11-5.86)	DFT-4.1, GDD-4.1, CLASS-4.1, PS-4.1, PRI-4.1, RRP-4.1	All LD, SD1, SD4, all seasons	Phvul.004G043700	AT3G02250			O-fucosyltransferase family protein; CONTAINS InterPro DOMAIN/s: GDP-fucose protein O-fucosyltransferase (InterPro:IPR019378); BEST Arabidopsis thaliana protein match is: O-fucosyltransferase family protein (TAIR:AT5G15740.1); Has 830 Blast hits to 821 proteins in 30 species: Archae - 0; Bacteria - 0; Metazoa - 0; Fungi - 0; Plants - 830; Viruses - 0; Other Eukaryotes - 0 (source: NCBI BLink).
4 (4.11-5.86)	DFT-4.1, GDD-4.1, CLASS-4.1, PS-4.1, PRI-4.1, RRP-4.1	All LD, SD1, SD4, all seasons	Phvul.004G041100	AT3G02220			unknown protein; CONTAINS InterPro DOMAIN/s: Protein of unknown function DUF2039 (InterPro:IPR019351); Has 215 Blast hits to 215 proteins in 94 species: Archae - 2; Bacteria - 2; Metazoa - 125; Fungi - 4; Plants - 38; Viruses - 0; Other Eukaryotes - 44 (source: NCBI BLink).
4 (4.11-5.86)	DFT-4.1, GDD-4.1, CLASS-4.1, PS-4.1, PRI-4.1, RRP-4.1	All LD, SD1, SD4, all seasons	Phvul.004G036500	AT1G19410			FBD / Leucine Rich Repeat domains containing protein; CONTAINS InterPro DOMAIN/s: FBD (InterPro:IPR013596), Leucine-rich repeat 2 (InterPro:IPR013101); BEST Arabidopsis thaliana protein match is: Protein with RNI-like/FBD-like domains (TAIR:AT5G62970.1); Has 783 Blast hits to 763 proteins in 11 species: Archae - 0; Bacteria - 0; Metazoa - 0; Fungi - 0; Plants - 783; Viruses - 0; Other Eukaryotes …
4 (4.11-5.86)	DFT-4.1, GDD-4.1, CLASS-4.1, PS-4.1, PRI-4.1, RRP-4.1	All LD, SD1, SD4, all seasons	Phvul.004G037400	AT2G03630		Expressed in flower	suppressor SRP40-like protein unknown protein; FUNCTIONS IN: molecular_function unknown; INVOLVED IN: biological_process unknown; LOCATED IN: cellular_component unknown; EXPRESSED IN: male gametophyte, pollen tube; EXPRESSED DURING: L mature pollen stage, M germinated pollen stage; BEST Arabidopsis thaliana protein match is: unknown protein (TAIR:AT1G74220.1); Has 87 Blast hits to 87 proteins in …
4 (4.11-5.86)	DFT-4.1, GDD-4.1, CLASS-4.1, PS-4.1, PRI-4.1, RRP-4.1	All LD, SD1, SD4, all seasons	Phvul.004G038200	AT3G02200			Proteasome component (PCI) domain protein; CONTAINS InterPro DOMAIN/s: Proteasome component (PCI) domain (InterPro:IPR000717); BEST Arabidopsis thaliana protein match is: Proteasome component (PCI) domain protein (TAIR:AT5G15610.1); Has 412 Blast hits to 412 proteins in 178 species: Archae - 0; Bacteria - 2; Metazoa - 180; Fungi - 112; Plants - 66; Viruses - 0; Other Eukaryotes - 52 (source: NCBI…
4 (4.11-5.86)	DFT-4.1, GDD-4.1, CLASS-4.1, PS-4.1, PRI-4.1, RRP-4.1	All LD, SD1, SD4, all seasons	Phvul.004G037300	AT3G02120			hydroxyproline-rich glycoprotein family protein; Has 21 Blast hits to 21 proteins in 9 species: Archae - 0; Bacteria - 0; Metazoa - 0; Fungi - 0; Plants - 21; Viruses - 0; Other Eukaryotes - 0 (source: NCBI BLink).
4 (4.11-5.86)	DFT-4.1, GDD-4.1, CLASS-4.1, PS-4.1, PRI-4.1, RRP-4.1	All LD, SD1, SD4, all seasons	Phvul.004G035300	AT3G02100		Metabolic process	UDP-Glycosyltransferase superfamily protein; FUNCTIONS IN: UDP-glycosyltransferase activity, transferase activity, transferring glycosyl groups; INVOLVED IN: metabolic process; LOCATED IN: cellular_component unknown; EXPRESSED IN: root; CONTAINS InterPro DOMAIN/s: UDP-glucuronosyl/UDP-glucosyltransferase (InterPro:IPR002213); BEST Arabidopsis thaliana protein match is: UDP-Glycosyltransferase sup…
4 (4.11-5.86)	DFT-4.1, GDD-4.1, CLASS-4.1, PS-4.1, PRI-4.1, RRP-4.1	All LD, SD1, SD4, all seasons	Phvul.004G039000	AT1G13680			PLC-like phosphodiesterases superfamily protein; FUNCTIONS IN: phospholipase C activity, phosphoric diester hydrolase activity; INVOLVED IN: intracellular signaling pathway, lipid metabolic process; LOCATED IN: endomembrane system; EXPRESSED IN: embryo, flower, seed; EXPRESSED DURING: F mature embryo stage, petal differentiation and expansion stage, E expanded cotyledon stage, D bilateral stage; …
4 (4.11-5.86)	DFT-4.1, GDD-4.1, CLASS-4.1, PS-4.1, PRI-4.1, RRP-4.1	All LD, SD1, SD4, all seasons	Phvul.004G039300	AT1G13680			PLC-like phosphodiesterases superfamily protein; FUNCTIONS IN: phospholipase C activity, phosphoric diester hydrolase activity; INVOLVED IN: intracellular signaling pathway, lipid metabolic process; LOCATED IN: endomembrane system; EXPRESSED IN: embryo, flower, seed; EXPRESSED DURING: F mature embryo stage, petal differentiation and expansion stage, E expanded cotyledon stage, D bilateral stage; …
4 (4.11-5.86)	DFT-4.1, GDD-4.1, CLASS-4.1, PS-4.1, PRI-4.1, RRP-4.1	All LD, SD1, SD4, all seasons	Phvul.004G044600	AT4G30820			cyclin-dependent kinase-activating kinase assembly factor-related / CDK-activating kinase assembly factor-related; FUNCTIONS IN: molecular_function unknown; INVOLVED IN: cell cycle; LOCATED IN: nucleus; EXPRESSED IN: 22 plant structures; EXPRESSED DURING: 13 growth stages; CONTAINS InterPro DOMAIN/s: Cdk-activating kinase assembly factor (MAT1) (InterPro:IPR004575), Cdk-activating kinase assembly…
4 (4.11-5.86)	DFT-4.1, GDD-4.1, CLASS-4.1, PS-4.1, PRI-4.1, RRP-4.1	All LD, SD1, SD4, all seasons	Phvul.004G038100	AT4G17430			O-fucosyltransferase family protein; CONTAINS InterPro DOMAIN/s: GDP-fucose protein O-fucosyltransferase (InterPro:IPR019378); Has 42 Blast hits to 40 proteins in 15 species: Archae - 0; Bacteria - 0; Metazoa - 0; Fungi - 3; Plants - 37; Viruses - 0; Other Eukaryotes - 2 (source: NCBI BLink).
4 (4.11-5.86)	DFT-4.1, GDD-4.1, CLASS-4.1, PS-4.1, PRI-4.1, RRP-4.1	All LD, SD1, SD4, all seasons	Phvul.004G036300	AT3G14470			NB-ARC domain-containing disease resistance protein; FUNCTIONS IN: protein binding; INVOLVED IN: apoptosis, defense response; LOCATED IN: endomembrane system; EXPRESSED IN: 23 plant structures; EXPRESSED DURING: 14 growth stages; CONTAINS InterPro DOMAIN/s: Leucine-rich repeat-containing protein (InterPro:IPR015766), NB-ARC (InterPro:IPR002182), Leucine-rich repeat (InterPro:IPR001611), Disease r…
4 (4.11-5.86)	DFT-4.1, GDD-4.1, CLASS-4.1, PS-4.1, PRI-4.1, RRP-4.1	All LD, SD1, SD4, all seasons	Phvul.004G036700	AT3G14470			NB-ARC domain-containing disease resistance protein; FUNCTIONS IN: protein binding; INVOLVED IN: apoptosis, defense response; LOCATED IN: endomembrane system; EXPRESSED IN: 23 plant structures; EXPRESSED DURING: 14 growth stages; CONTAINS InterPro DOMAIN/s: Leucine-rich repeat-containing protein (InterPro:IPR015766), NB-ARC (InterPro:IPR002182), Leucine-rich repeat (InterPro:IPR001611), Disease r…
4 (4.11-5.86)	DFT-4.1, GDD-4.1, CLASS-4.1, PS-4.1, PRI-4.1, RRP-4.1	All LD, SD1, SD4, all seasons	Phvul.004G040200	AT3G29635			HXXXD-type acyl-transferase family protein; FUNCTIONS IN: transferase activity, transferring acyl groups other than amino-acyl groups, transferase activity; INVOLVED IN: biological_process unknown; EXPRESSED IN: root; CONTAINS InterPro DOMAIN/s: Transferase (InterPro:IPR003480); BEST Arabidopsis thaliana protein match is: HXXXD-type acyl-transferase family protein (TAIR:AT3G29680.1); Has 2281 Bla…
4 (4.11-5.86)	DFT-4.1, GDD-4.1, CLASS-4.1, PS-4.1, PRI-4.1, RRP-4.1	All LD, SD1, SD4, all seasons	Phvul.004G040700	AT3G29635			HXXXD-type acyl-transferase family protein; FUNCTIONS IN: transferase activity, transferring acyl groups other than amino-acyl groups, transferase activity; INVOLVED IN: biological_process unknown; EXPRESSED IN: root; CONTAINS InterPro DOMAIN/s: Transferase (InterPro:IPR003480); BEST Arabidopsis thaliana protein match is: HXXXD-type acyl-transferase family protein (TAIR:AT3G29680.1); Has 2281 Bla…
4 (4.11-5.86)	DFT-4.1, GDD-4.1, CLASS-4.1, PS-4.1, PRI-4.1, RRP-4.1	All LD, SD1, SD4, all seasons	Phvul.004G040101	AT3G29690			HXXXD-type acyl-transferase family protein; FUNCTIONS IN: transferase activity, transferring acyl groups other than amino-acyl groups, transferase activity; INVOLVED IN: biological_process unknown; EXPRESSED IN: root; CONTAINS InterPro DOMAIN/s: Transferase (InterPro:IPR003480); BEST Arabidopsis thaliana protein match is: HXXXD-type acyl-transferase family protein (TAIR:AT3G29680.1); Has 2281 Bla…
4 (4.11-5.86)	DFT-4.1, GDD-4.1, CLASS-4.1, PS-4.1, PRI-4.1, RRP-4.1	All LD, SD1, SD4, all seasons	Phvul.004G037900	AT3G29760			Haloacid dehalogenase-like hydrolase (HAD) superfamily protein; FUNCTIONS IN: molecular_function unknown; INVOLVED IN: biological_process unknown; LOCATED IN: cellular_component unknown; EXPRESSED IN: 24 plant structures; EXPRESSED DURING: 13 growth stages; CONTAINS InterPro DOMAIN/s: NLI interacting factor (InterPro:IPR004274); BEST Arabidopsis thaliana protein match is: Haloacid dehalogenase-li…
4 (4.11-5.86)	DFT-4.1, GDD-4.1, CLASS-4.1, PS-4.1, PRI-4.1, RRP-4.1	All LD, SD1, SD4, all seasons	Phvul.004G044400	AT3G30380			alpha/beta-Hydrolases superfamily protein; INVOLVED IN: biological_process unknown; LOCATED IN: cellular_component unknown; EXPRESSED IN: 21 plant structures; EXPRESSED DURING: 12 growth stages; CONTAINS InterPro DOMAIN/s: Alpha/beta hydrolase fold-1 (InterPro:IPR000073); BEST Arabidopsis thaliana protein match is: alpha/beta-Hydrolases superfamily protein (TAIR:AT3G01690.1); Has 4039 Blast hits …
4 (4.11-5.86)	DFT-4.1, GDD-4.1, CLASS-4.1, PS-4.1, PRI-4.1, RRP-4.1	All LD, SD1, SD4, all seasons	Phvul.004G045100	AT3G30390			Transmembrane amino acid transporter family protein; FUNCTIONS IN: amino acid transmembrane transporter activity; INVOLVED IN: amino acid transport; LOCATED IN: plasma membrane, vacuole, membrane; EXPRESSED IN: 25 plant structures; EXPRESSED DURING: 15 growth stages; CONTAINS InterPro DOMAIN/s: Amino acid transporter, transmembrane (InterPro:IPR013057); BEST Arabidopsis thaliana protein match is:…
4 (4.11-5.86)	DFT-4.1, GDD-4.1, CLASS-4.1, PS-4.1, PRI-4.1, RRP-4.1	All LD, SD1, SD4, all seasons	Phvul.004G045200	AT3G30390			Transmembrane amino acid transporter family protein; FUNCTIONS IN: amino acid transmembrane transporter activity; INVOLVED IN: amino acid transport; LOCATED IN: plasma membrane, vacuole, membrane; EXPRESSED IN: 25 plant structures; EXPRESSED DURING: 15 growth stages; CONTAINS InterPro DOMAIN/s: Amino acid transporter, transmembrane (InterPro:IPR013057); BEST Arabidopsis thaliana protein match is:…
4 (4.11-5.86)	DFT-4.1, GDD-4.1, CLASS-4.1, PS-4.1, PRI-4.1, RRP-4.1	All LD, SD1, SD4, all seasons	Phvul.004G042000	AT4G26485			CONTAINS InterPro DOMAIN/s: Domain of unknown function DUF2431 (InterPro:IPR019446); BEST Arabidopsis thaliana protein match is: Domain of unknown function (DUF2431) (TAIR:AT1G55790.1). methyltransferase small domain protein
4 (4.11-5.86)	DFT-4.1, GDD-4.1, CLASS-4.1, PS-4.1, PRI-4.1, RRP-4.1	All LD, SD1, SD4, all seasons	Phvul.004G041900	AT5G15802			chaperone. unknown protein; FUNCTIONS IN: molecular_function unknown; INVOLVED IN: biological_process unknown; LOCATED IN: endomembrane system; Has 35 Blast hits to 35 proteins in 15 species: Archae - 0; Bacteria - 4; Metazoa - 0; Fungi - 0; Plants - 31; Viruses - 0; Other Eukaryotes - 0 (source: NCBI BLink).
4 (4.11-5.86)	DFT-4.1, GDD-4.1, CLASS-4.1, PS-4.1, PRI-4.1, RRP-4.1	All LD, SD1, SD4, all seasons	Phvul.004G046700	AT1G33120
4 (4.11-5.86)	DFT-4.1, GDD-4.1, CLASS-4.1, PS-4.1, PRI-4.1, RRP-4.1	All LD, SD1, SD4, all seasons	Phvul.004G046800	AT5G16000	NIK1
4 (4.11-5.86)	DFT-4.1, GDD-4.1, CLASS-4.1, PS-4.1, PRI-4.1, RRP-4.1	All LD, SD1, SD4, all seasons	Phvul.004G046900	AT5G38760
4 (4.11-5.86)	DFT-4.1, GDD-4.1, CLASS-4.1, PS-4.1, PRI-4.1, RRP-4.1	All LD, SD1, SD4, all seasons	Phvul.004G047000	AT5G38760
4 (4.11-5.86)	DFT-4.1, GDD-4.1, CLASS-4.1, PS-4.1, PRI-4.1, RRP-4.1	All LD, SD1, SD4, all seasons	Phvul.004G047100	AT5G38760
4 (4.11-5.86)	DFT-4.1, GDD-4.1, CLASS-4.1, PS-4.1, PRI-4.1, RRP-4.1	All LD, SD1, SD4, all seasons	Phvul.004G047200	AT5G38760
4 (4.11-5.86)	DFT-4.1, GDD-4.1, CLASS-4.1, PS-4.1, PRI-4.1, RRP-4.1	All LD, SD1, SD4, all seasons	Phvul.004G047300	AT5G38760
4 (4.11-5.86)	DFT-4.1, GDD-4.1, CLASS-4.1, PS-4.1, PRI-4.1, RRP-4.1	All LD, SD1, SD4, all seasons	Phvul.004G047400	AT3G02460
4 (4.11-5.86)	DFT-4.1, GDD-4.1, CLASS-4.1, PS-4.1, PRI-4.1, RRP-4.1	All LD, SD1, SD4, all seasons	Phvul.004G047500	AT3G02450
4 (4.11-5.86)	DFT-4.1, GDD-4.1, CLASS-4.1, PS-4.1, PRI-4.1, RRP-4.1	All LD, SD1, SD4, all seasons	Phvul.004G047600	AT1G03970	GBF4
4 (4.11-5.86)	DFT-4.1, GDD-4.1, CLASS-4.1, PS-4.1, PRI-4.1, RRP-4.1	All LD, SD1, SD4, all seasons	Phvul.004G047700	AT3G48950
4 (4.11-5.86)	DFT-4.1, GDD-4.1, CLASS-4.1, PS-4.1, PRI-4.1, RRP-4.1	All LD, SD1, SD4, all seasons	Phvul.004G047800	AT3G48950
4 (4.11-5.86)	DFT-4.1, GDD-4.1, CLASS-4.1, PS-4.1, PRI-4.1, RRP-4.1	All LD, SD1, SD4, all seasons	Phvul.004G047900	AT5G38710
4 (4.11-5.86)	DFT-4.1, GDD-4.1, CLASS-4.1, PS-4.1, PRI-4.1, RRP-4.1	All LD, SD1, SD4, all seasons	Phvul.004G048000	AT4G27220
4 (4.11-5.86)	DFT-4.1, GDD-4.1, CLASS-4.1, PS-4.1, PRI-4.1, RRP-4.1	All LD, SD1, SD4, all seasons	Phvul.004G048100	AT3G59500
4 (4.11-5.86)	DFT-4.1, GDD-4.1, CLASS-4.1, PS-4.1, PRI-4.1, RRP-4.1	All LD, SD1, SD4, all seasons	Phvul.004G048200	AT1G61600
4 (4.11-5.86)	DFT-4.1, GDD-4.1, CLASS-4.1, PS-4.1, PRI-4.1, RRP-4.1	All LD, SD1, SD4, all seasons	Phvul.004G048300	AT5G38530	TSBtype2
4 (4.11-5.86)	DFT-4.1, GDD-4.1, CLASS-4.1, PS-4.1, PRI-4.1, RRP-4.1	All LD, SD1, SD4, all seasons	Phvul.004G042100	AT5G15802			chaperone. unknown protein; FUNCTIONS IN: molecular_function unknown; INVOLVED IN: biological_process unknown; LOCATED IN: endomembrane system; Has 35 Blast hits to 35 proteins in 15 species: Archae - 0; Bacteria - 4; Metazoa - 0; Fungi - 0; Plants - 31; Viruses - 0; Other Eukaryotes - 0 (source: NCBI BLink).
4 (4.11-5.86)	DFT-4.1, GDD-4.1, CLASS-4.1, PS-4.1, PRI-4.1, RRP-4.1	All LD, SD1, SD4, all seasons	Phvul.004G035500				PTHR11926:SF162 - UDP-GLYCOSYLTRANSFERASE 83A2
4 (4.11-5.86)	DFT-4.1, GDD-4.1, CLASS-4.1, PS-4.1, PRI-4.1, RRP-4.1	All LD, SD1, SD4, all seasons	Phvul.004G035600				PTHR11926//PTHR11926:SF289 - GLUCOSYL/GLUCURONOSYL TRANSFERASES // SUBFAMILY NOT NAMED
4 (4.11-5.86)	DFT-4.1, GDD-4.1, CLASS-4.1, PS-4.1, PRI-4.1, RRP-4.1	All LD, SD1, SD4, all seasons	Phvul.004G035700				PTHR11926//PTHR11926:SF289 - GLUCOSYL/GLUCURONOSYL TRANSFERASES // SUBFAMILY NOT NAMED
4 (4.11-5.86)	DFT-4.1, GDD-4.1, CLASS-4.1, PS-4.1, PRI-4.1, RRP-4.1	All LD, SD1, SD4, all seasons	Phvul.004G035800				PTHR11926//PTHR11926:SF289 - GLUCOSYL/GLUCURONOSYL TRANSFERASES // SUBFAMILY NOT NAMED
4 (4.11-5.86)	DFT-4.1, GDD-4.1, CLASS-4.1, PS-4.1, PRI-4.1, RRP-4.1	All LD, SD1, SD4, all seasons	Phvul.004G035900				PTHR11926//PTHR11926:SF289 - GLUCOSYL/GLUCURONOSYL TRANSFERASES // SUBFAMILY NOT NAMED
4 (4.11-5.86)	DFT-4.1, GDD-4.1, CLASS-4.1, PS-4.1, PRI-4.1, RRP-4.1	All LD, SD1, SD4, all seasons	Phvul.004G036000				PTHR11926//PTHR11926:SF289 - GLUCOSYL/GLUCURONOSYL TRANSFERASES // SUBFAMILY NOT NAMED
4 (4.11-5.86)	DFT-4.1, GDD-4.1, CLASS-4.1, PS-4.1, PRI-4.1, RRP-4.1	All LD, SD1, SD4, all seasons	Phvul.004G036100				PTHR11926//PTHR11926:SF289 - GLUCOSYL/GLUCURONOSYL TRANSFERASES // SUBFAMILY NOT NAMED
4 (4.11-5.86)	DFT-4.1, GDD-4.1, CLASS-4.1, PS-4.1, PRI-4.1, RRP-4.1	All LD, SD1, SD4, all seasons	Phvul.004G036200				PTHR23155//PTHR23155:SF414 - LEUCINE-RICH REPEAT-CONTAINING PROTEIN // SUBFAMILY NOT NAMED
4 (4.11-5.86)	DFT-4.1, GDD-4.1, CLASS-4.1, PS-4.1, PRI-4.1, RRP-4.1	All LD, SD1, SD4, all seasons	Phvul.004G036600				PTHR23155//PTHR23155:SF414 - LEUCINE-RICH REPEAT-CONTAINING PROTEIN // SUBFAMILY NOT NAMED
4 (4.11-5.86)	DFT-4.1, GDD-4.1, CLASS-4.1, PS-4.1, PRI-4.1, RRP-4.1	All LD, SD1, SD4, all seasons	Phvul.004G036650				PTHR24092:SF75 - PHOSPHOLIPID-TRANSPORTING ATPASE 8-RELATED
4 (4.11-5.86)	DFT-4.1, GDD-4.1, CLASS-4.1, PS-4.1, PRI-4.1, RRP-4.1	All LD, SD1, SD4, all seasons	Phvul.004G036800				PTHR23155//PTHR23155:SF414 - LEUCINE-RICH REPEAT-CONTAINING PROTEIN // SUBFAMILY NOT NAMED
4 (4.11-5.86)	DFT-4.1, GDD-4.1, CLASS-4.1, PS-4.1, PRI-4.1, RRP-4.1	All LD, SD1, SD4, all seasons	Phvul.004G036900				PTHR23155//PTHR23155:SF414 - LEUCINE-RICH REPEAT-CONTAINING PROTEIN // SUBFAMILY NOT NAMED
4 (4.11-5.86)	DFT-4.1, GDD-4.1, CLASS-4.1, PS-4.1, PRI-4.1, RRP-4.1	All LD, SD1, SD4, all seasons	Phvul.004G037000				PTHR11926//PTHR11926:SF289 - GLUCOSYL/GLUCURONOSYL TRANSFERASES // SUBFAMILY NOT NAMED
4 (4.11-5.86)	DFT-4.1, GDD-4.1, CLASS-4.1, PS-4.1, PRI-4.1, RRP-4.1	All LD, SD1, SD4, all seasons	Phvul.004G037100				PTHR11926//PTHR11926:SF289 - GLUCOSYL/GLUCURONOSYL TRANSFERASES // SUBFAMILY NOT NAMED
4 (4.11-5.86)	DFT-4.1, GDD-4.1, CLASS-4.1, PS-4.1, PRI-4.1, RRP-4.1	All LD, SD1, SD4, all seasons	Phvul.004G037800				PTHR31680:SF4 - PROTEIN LONGIFOLIA 1-RELATED
4 (4.11-5.86)	DFT-4.1, GDD-4.1, CLASS-4.1, PS-4.1, PRI-4.1, RRP-4.1	All LD, SD1, SD4, all seasons	Phvul.004G038300
4 (4.11-5.86)	DFT-4.1, GDD-4.1, CLASS-4.1, PS-4.1, PRI-4.1, RRP-4.1	All LD, SD1, SD4, all seasons	Phvul.004G038400
4 (4.11-5.86)	DFT-4.1, GDD-4.1, CLASS-4.1, PS-4.1, PRI-4.1, RRP-4.1	All LD, SD1, SD4, all seasons	Phvul.004G038501
4 (4.11-5.86)	DFT-4.1, GDD-4.1, CLASS-4.1, PS-4.1, PRI-4.1, RRP-4.1	All LD, SD1, SD4, all seasons	Phvul.004G038600
4 (4.11-5.86)	DFT-4.1, GDD-4.1, CLASS-4.1, PS-4.1, PRI-4.1, RRP-4.1	All LD, SD1, SD4, all seasons	Phvul.004G038800				PF02439 - Adenovirus E3 region protein CR2 (Adeno_E3_CR2)
4 (4.11-5.86)	DFT-4.1, GDD-4.1, CLASS-4.1, PS-4.1, PRI-4.1, RRP-4.1	All LD, SD1, SD4, all seasons	Phvul.004G038900				PTHR13844:SF12 - EXPRESSED PROTEIN-RELATED
4 (4.11-5.86)	DFT-4.1, GDD-4.1, CLASS-4.1, PS-4.1, PRI-4.1, RRP-4.1	All LD, SD1, SD4, all seasons	Phvul.004G039100				K04730 - interleukin-1 receptor-associated kinase 1 (IRAK1)
4 (4.11-5.86)	DFT-4.1, GDD-4.1, CLASS-4.1, PS-4.1, PRI-4.1, RRP-4.1	All LD, SD1, SD4, all seasons	Phvul.004G039200				PF07714//PF11721 - Protein tyrosine kinase (Pkinase_Tyr) // Di-glucose binding within endoplasmic reticulum (Malectin)
4 (4.11-5.86)	DFT-4.1, GDD-4.1, CLASS-4.1, PS-4.1, PRI-4.1, RRP-4.1	All LD, SD1, SD4, all seasons	Phvul.004G039400				PF07714//PF11721 - Protein tyrosine kinase (Pkinase_Tyr) // Di-glucose binding within endoplasmic reticulum (Malectin)
4 (4.11-5.86)	DFT-4.1, GDD-4.1, CLASS-4.1, PS-4.1, PRI-4.1, RRP-4.1	All LD, SD1, SD4, all seasons	Phvul.004G039501				2.7.11.1 - Non-specific serine/threonine protein kinase / Threonine-specific protein kinase
4 (4.11-5.86)	DFT-4.1, GDD-4.1, CLASS-4.1, PS-4.1, PRI-4.1, RRP-4.1	All LD, SD1, SD4, all seasons	Phvul.004G039600				PF07714//PF11721 - Protein tyrosine kinase (Pkinase_Tyr) // Di-glucose binding within endoplasmic reticulum (Malectin)
4 (4.11-5.86)	DFT-4.1, GDD-4.1, CLASS-4.1, PS-4.1, PRI-4.1, RRP-4.1	All LD, SD1, SD4, all seasons	Phvul.004G039700				PF07714//PF11721 - Protein tyrosine kinase (Pkinase_Tyr) // Di-glucose binding within endoplasmic reticulum (Malectin)
4 (4.11-5.86)	DFT-4.1, GDD-4.1, CLASS-4.1, PS-4.1, PRI-4.1, RRP-4.1	All LD, SD1, SD4, all seasons	Phvul.004G039800				PF07714//PF11721 - Protein tyrosine kinase (Pkinase_Tyr) // Di-glucose binding within endoplasmic reticulum (Malectin)
4 (4.11-5.86)	DFT-4.1, GDD-4.1, CLASS-4.1, PS-4.1, PRI-4.1, RRP-4.1	All LD, SD1, SD4, all seasons	Phvul.004G039900				PF07714//PF11721 - Protein tyrosine kinase (Pkinase_Tyr) // Di-glucose binding within endoplasmic reticulum (Malectin)
4 (4.11-5.86)	DFT-4.1, GDD-4.1, CLASS-4.1, PS-4.1, PRI-4.1, RRP-4.1	All LD, SD1, SD4, all seasons	Phvul.004G040000				PF07714//PF11721 - Protein tyrosine kinase (Pkinase_Tyr) // Di-glucose binding within endoplasmic reticulum (Malectin)
4 (4.11-5.86)	DFT-4.1, GDD-4.1, CLASS-4.1, PS-4.1, PRI-4.1, RRP-4.1	All LD, SD1, SD4, all seasons	Phvul.004G040300				PF07714//PF11721 - Protein tyrosine kinase (Pkinase_Tyr) // Di-glucose binding within endoplasmic reticulum (Malectin)
4 (4.11-5.86)	DFT-4.1, GDD-4.1, CLASS-4.1, PS-4.1, PRI-4.1, RRP-4.1	All LD, SD1, SD4, all seasons	Phvul.004G040500				PF10536 - Plant mobile domain (PMD)
4 (4.11-5.86)	DFT-4.1, GDD-4.1, CLASS-4.1, PS-4.1, PRI-4.1, RRP-4.1	All LD, SD1, SD4, all seasons	Phvul.004G040600				PF12776 - Myb/SANT-like DNA-binding domain (Myb_DNA-bind_3)
4 (4.11-5.86)	DFT-4.1, GDD-4.1, CLASS-4.1, PS-4.1, PRI-4.1, RRP-4.1	All LD, SD1, SD4, all seasons	Phvul.004G040800
4 (4.11-5.86)	DFT-4.1, GDD-4.1, CLASS-4.1, PS-4.1, PRI-4.1, RRP-4.1	All LD, SD1, SD4, all seasons	Phvul.004G040901				PF11721 - Di-glucose binding within endoplasmic reticulum (Malectin)
4 (4.11-5.86)	DFT-4.1, GDD-4.1, CLASS-4.1, PS-4.1, PRI-4.1, RRP-4.1	All LD, SD1, SD4, all seasons	Phvul.004G041000				2.4.1.218 - Hydroquinone glucosyltransferase / Hydroquinone:O-glucosyltransferase
4 (4.11-5.86)	DFT-4.1, GDD-4.1, CLASS-4.1, PS-4.1, PRI-4.1, RRP-4.1	All LD, SD1, SD4, all seasons	Phvul.004G041300				PF04833 - COBRA-like protein (COBRA)
4 (4.11-5.86)	DFT-4.1, GDD-4.1, CLASS-4.1, PS-4.1, PRI-4.1, RRP-4.1	All LD, SD1, SD4, all seasons	Phvul.004G041800				1.14.11.11 - Hyoscyamine (6S)-dioxygenase / Hyoscyamine 6-beta-hydroxylase
4 (4.11-5.86)	DFT-4.1, GDD-4.1, CLASS-4.1, PS-4.1, PRI-4.1, RRP-4.1	All LD, SD1, SD4, all seasons	Phvul.004G042200				K19307 - 25S rRNA (uracil2634-N3)-methyltransferase [EC:2.1.1.313] (BMT5)
4 (4.11-5.86)	DFT-4.1, GDD-4.1, CLASS-4.1, PS-4.1, PRI-4.1, RRP-4.1	All LD, SD1, SD4, all seasons	Phvul.004G042450				PTHR11945//PTHR11945:SF180 - MADS BOX PROTEIN // SUBFAMILY NOT NAMED
4 (4.11-5.86)	DFT-4.1, GDD-4.1, CLASS-4.1, PS-4.1, PRI-4.1, RRP-4.1	All LD, SD1, SD4, all seasons	Phvul.004G042700				PF01190 - Pollen proteins Ole e I like (Pollen_Ole_e_I)
4 (4.11-5.86)	DFT-4.1, GDD-4.1, CLASS-4.1, PS-4.1, PRI-4.1, RRP-4.1	All LD, SD1, SD4, all seasons	Phvul.004G042800				2.7.7.6 - DNA-directed RNA polymerase / RNA polymerase III
4 (4.11-5.86)	DFT-4.1, GDD-4.1, CLASS-4.1, PS-4.1, PRI-4.1, RRP-4.1	All LD, SD1, SD4, all seasons	Phvul.004G042900				PTHR11926//PTHR11926:SF280 - GLUCOSYL/GLUCURONOSYL TRANSFERASES // SUBFAMILY NOT NAMED
4 (4.11-5.86)	DFT-4.1, GDD-4.1, CLASS-4.1, PS-4.1, PRI-4.1, RRP-4.1	All LD, SD1, SD4, all seasons	Phvul.004G043000				PTHR11926//PTHR11926:SF280 - GLUCOSYL/GLUCURONOSYL TRANSFERASES // SUBFAMILY NOT NAMED
4 (4.11-5.86)	DFT-4.1, GDD-4.1, CLASS-4.1, PS-4.1, PRI-4.1, RRP-4.1	All LD, SD1, SD4, all seasons	Phvul.004G043100				PTHR11926//PTHR11926:SF280 - GLUCOSYL/GLUCURONOSYL TRANSFERASES // SUBFAMILY NOT NAMED
4 (4.11-5.86)	DFT-4.1, GDD-4.1, CLASS-4.1, PS-4.1, PRI-4.1, RRP-4.1	All LD, SD1, SD4, all seasons	Phvul.004G043200				PTHR11926//PTHR11926:SF280 - GLUCOSYL/GLUCURONOSYL TRANSFERASES // SUBFAMILY NOT NAMED
4 (4.11-5.86)	DFT-4.1, GDD-4.1, CLASS-4.1, PS-4.1, PRI-4.1, RRP-4.1	All LD, SD1, SD4, all seasons	Phvul.004G043300				PTHR11926//PTHR11926:SF280 - GLUCOSYL/GLUCURONOSYL TRANSFERASES // SUBFAMILY NOT NAMED
4 (4.11-5.86)	DFT-4.1, GDD-4.1, CLASS-4.1, PS-4.1, PRI-4.1, RRP-4.1	All LD, SD1, SD4, all seasons	Phvul.004G043400				PTHR11926//PTHR11926:SF280 - GLUCOSYL/GLUCURONOSYL TRANSFERASES // SUBFAMILY NOT NAMED
4 (4.11-5.86)	DFT-4.1, GDD-4.1, CLASS-4.1, PS-4.1, PRI-4.1, RRP-4.1	All LD, SD1, SD4, all seasons	Phvul.004G043500				PTHR11926//PTHR11926:SF280 - GLUCOSYL/GLUCURONOSYL TRANSFERASES // SUBFAMILY NOT NAMED
4 (4.11-5.86)	DFT-4.1, GDD-4.1, CLASS-4.1, PS-4.1, PRI-4.1, RRP-4.1	All LD, SD1, SD4, all seasons	Phvul.004G043600				PTHR11926//PTHR11926:SF280 - GLUCOSYL/GLUCURONOSYL TRANSFERASES // SUBFAMILY NOT NAMED
4 (4.11-5.86)	DFT-4.1, GDD-4.1, CLASS-4.1, PS-4.1, PRI-4.1, RRP-4.1	All LD, SD1, SD4, all seasons	Phvul.004G044066				PTHR13683:SF348 - ASPARTYL PROTEASE FAMILY PROTEIN
4 (4.11-5.86)	DFT-4.1, GDD-4.1, CLASS-4.1, PS-4.1, PRI-4.1, RRP-4.1	All LD, SD1, SD4, all seasons	Phvul.004G044132				PTHR11638//PTHR11638:SF116 - ATP-DEPENDENT CLP PROTEASE // SUBFAMILY NOT NAMED
4 (4.11-5.86)	DFT-4.1, GDD-4.1, CLASS-4.1, PS-4.1, PRI-4.1, RRP-4.1	All LD, SD1, SD4, all seasons	Phvul.004G044200				KOG0580 - Serine/threonine protein kinase
4 (4.11-5.86)	DFT-4.1, GDD-4.1, CLASS-4.1, PS-4.1, PRI-4.1, RRP-4.1	All LD, SD1, SD4, all seasons	Phvul.004G044301				PTHR23155//PTHR23155:SF414 - LEUCINE-RICH REPEAT-CONTAINING PROTEIN // SUBFAMILY NOT NAMED
4 (4.11-5.86)	DFT-4.1, GDD-4.1, CLASS-4.1, PS-4.1, PRI-4.1, RRP-4.1	All LD, SD1, SD4, all seasons	Phvul.004G044800				PF00560//PF08263//PF13855 - Leucine Rich Repeat (LRR_1) // Leucine rich repeat N-terminal domain (LRRNT_2) // Leucine rich repeat (LRR_8)
4 (4.11-5.86)	DFT-4.1, GDD-4.1, CLASS-4.1, PS-4.1, PRI-4.1, RRP-4.1	All LD, SD1, SD4, all seasons	Phvul.004G044900				PF00560//PF08263//PF13855 - Leucine Rich Repeat (LRR_1) // Leucine rich repeat N-terminal domain (LRRNT_2) // Leucine rich repeat (LRR_8)
4 (4.11-5.86)	DFT-4.1, GDD-4.1, CLASS-4.1, PS-4.1, PRI-4.1, RRP-4.1	All LD, SD1, SD4, all seasons	Phvul.004G046100				K00033 - 6-phosphogluconate dehydrogenase (PGD, gnd, gntZ)
4 (4.11-5.86)	DFT-4.1, GDD-4.1, CLASS-4.1, PS-4.1, PRI-4.1, RRP-4.1	All LD, SD1, SD4, all seasons	Phvul.004G046300				PTHR33228:SF3 - PROTEIN GLUTAMINE DUMPER 8
4 (4.11-5.86)	DFT-4.1, GDD-4.1, CLASS-4.1, PS-4.1, PRI-4.1, RRP-4.1	All LD, SD1, SD4, all seasons	Phvul.004G046400				PTHR11017//PTHR11017:SF162 - LEUCINE-RICH REPEAT-CONTAINING PROTEIN // SUBFAMILY NOT NAMED
4 (4.11-5.86)	DFT-4.1, GDD-4.1, CLASS-4.1, PS-4.1, PRI-4.1, RRP-4.1	All LD, SD1, SD4, all seasons	Phvul.004G046500
9 (1.86-3.56)	DTF-9.1, GDD-9.1,	SD6	Phvul.009G013900	AT3G54340	AP3	Flower development	Floral homeotic gene encoding a MADS domain protein homologous to SRF transcription factors. Specifies petal and stamen identities. Associates with PISTILLATA.APETALA 3 (AP3); CONTAINS InterPro DOMAIN/s: Transcription factor, MADS-box (InterPro:IPR002100), Transcription factor, K-box (InterPro:IPR002487); BEST Arabidopsis thaliana protein match is: AGAMOUS-like 71 (TAIR:AT5G51870.1); Has 6838 Bla…
9 (1.86-3.56)	DTF-9.1, GDD-9.1,	SD6	Phvul.009G011600	AT1G20650	ASG5		Protein kinase superfamily protein; FUNCTIONS IN: protein serine/threonine kinase activity, protein kinase activity, ATP binding; INVOLVED IN: protein amino acid phosphorylation; LOCATED IN: cellular_component unknown; EXPRESSED IN: 22 plant structures; EXPRESSED DURING: 13 growth stages; CONTAINS InterPro DOMAIN/s: Protein kinase, ATP binding site (InterPro:IPR017441), Protein kinase, catalytic …
9 (1.86-3.56)	DTF-9.1, GDD-9.1,	SD6	Phvul.009G016300	AT1G47870	ATE2F2		ATE2F2; CONTAINS InterPro DOMAIN/s: Winged helix-turn-helix transcription repressor DNA-binding (InterPro:IPR011991), Transcription factor E2F/dimerisation partner (TDP) (InterPro:IPR003316), E2F Family (InterPro:IPR015633); BEST Arabidopsis thaliana protein match is: E2F transcription factor 1 (TAIR:AT5G22220.3).
9 (1.86-3.56)	DTF-9.1, GDD-9.1,	SD6	Phvul.009G018500	AT1G20160	ATSBT5.2		ATSBT5.2; FUNCTIONS IN: identical protein binding, serine-type endopeptidase activity; INVOLVED IN: proteolysis, negative regulation of catalytic activity; LOCATED IN: apoplast; EXPRESSED IN: 24 plant structures; EXPRESSED DURING: 12 growth stages; CONTAINS InterPro DOMAIN/s: Protease-associated PA (InterPro:IPR003137), Peptidase S8/S53, subtilisin/kexin/sedolisin (InterPro:IPR000209), Peptidase …
9 (1.86-3.56)	DTF-9.1, GDD-9.1,	SD6	Phvul.009G018600	AT1G20160	ATSBT5.2		ATSBT5.2; FUNCTIONS IN: identical protein binding, serine-type endopeptidase activity; INVOLVED IN: proteolysis, negative regulation of catalytic activity; LOCATED IN: apoplast; EXPRESSED IN: 24 plant structures; EXPRESSED DURING: 12 growth stages; CONTAINS InterPro DOMAIN/s: Protease-associated PA (InterPro:IPR003137), Peptidase S8/S53, subtilisin/kexin/sedolisin (InterPro:IPR000209), Peptidase …
9 (1.86-3.56)	DTF-9.1, GDD-9.1,	SD6	Phvul.009G014100	AT1G75540	BBX21		Encodes a B-box zinc finger transcription factor BBX21 (also named STH2/salt tolerance homolog2 and LHUS/long hypocotyl under shade). Interacts with COP1 to control de-etiolation. Also genetically interacts with COP1 to regulate shade avoidance.salt tolerance homolog2 (STH2); FUNCTIONS IN: sequence-specific DNA binding transcription factor activity, zinc ion binding; LOCATED IN: intracellular; EX…
9 (1.86-3.56)	DTF-9.1, GDD-9.1,	SD6	Phvul.009G012700	AT1G45130	BGAL5		beta-galactosidase 5 (BGAL5); FUNCTIONS IN: cation binding, beta-galactosidase activity, hydrolase activity, hydrolyzing O-glycosyl compounds, catalytic activity; INVOLVED IN: lactose catabolic process, using glucoside 3-dehydrogenase, carbohydrate metabolic process, lactose catabolic process via UDP-galactose, lactose catabolic process; LOCATED IN: endomembrane system; EXPRESSED IN: 24 plant str…
9 (1.86-3.56)	DTF-9.1, GDD-9.1,	SD6	Phvul.009G015000	AT5G42520	BPC6		Encodes a member of the BASIC PENTACYSTEINE (BPC) proteins. BPC proteins are plant-specific transcription factors present throughout land plants. BPC transcription factor family is integral for a wide range of processes that support normal growth and development. basic pentacysteine 6 (BPC6); FUNCTIONS IN: DNA binding, sequence-specific DNA binding transcription factor activity; INVOLVED IN: regu…
9 (1.86-3.56)	DTF-9.1, GDD-9.1,	SD6	Phvul.009G011100	AT4G35090	CAT2		Encodes a peroxisomal catalase, highly expressed in bolts and leaves. mRNA expression patterns show circadian regulation with mRNA levels being high in the subjective early morning. Loss of function mutations have increased H2O2 levels and increased H2O2 sensitivity. Mutants accumulate more toxic ions yet show decreased sensitivity to Li+. This decreased sensitivity is most likely due to an insen…
9 (1.86-3.56)	DTF-9.1, GDD-9.1,	SD6	Phvul.009G012500	AT5G42350	CFK1		Encodes CFK1 (COP9 INTERACTING F-BOX KELCH 1), a CSN (COP9 signalosome)-interacting F-box protein. CFK1 is a component of a functional ubiquitin ligase complex. CFK1 promotes hypocotyl elongation by increasing cell size. Galactose oxidase/kelch repeat superfamily protein; CONTAINS InterPro DOMAIN/s: F-box domain, cyclin-like (InterPro:IPR001810), Galactose oxidase/kelch, beta-propeller (InterPro:…
9 (1.86-3.56)	DTF-9.1, GDD-9.1,	SD6	Phvul.009G015700	AT1G19835	DUF869		Plant protein of unknown function (DUF869); FUNCTIONS IN: molecular_function unknown; INVOLVED IN: biological_process unknown; EXPRESSED IN: 22 plant structures; EXPRESSED DURING: 13 growth stages; CONTAINS InterPro DOMAIN/s: Protein of unknown function DUF869, plant (InterPro:IPR008587); BEST Arabidopsis thaliana protein match is: Plant protein of unknown function (DUF869) (TAIR:AT1G47900.2).
9 (1.86-3.56)	DTF-9.1, GDD-9.1,	SD6	Phvul.009G014000	AT3G54350	emb1967		embryo defective 1967 (emb1967); FUNCTIONS IN: molecular_function unknown; INVOLVED IN: embryo development ending in seed dormancy; LOCATED IN: cellular_component unknown; EXPRESSED IN: 23 plant structures; EXPRESSED DURING: 13 growth stages; CONTAINS InterPro DOMAIN/s: SMAD/FHA domain (InterPro:IPR008984), Forkhead-associated (FHA) domain (InterPro:IPR000253); BEST Arabidopsis thaliana protein m…
9 (1.86-3.56)	DTF-9.1, GDD-9.1,	SD6	Phvul.009G014700	AT4G29860	EMB2757		Encodes a WD repeat protein with seven WD repeat motifs, predicted to function in protein-protein interaction. Mutations caused defects in both embryo and seedling development.EMBRYO DEFECTIVE 2757 (EMB2757); FUNCTIONS IN: nucleotide binding; INVOLVED IN: acquisition of desiccation tolerance, embryo development, embryo development ending in seed dormancy; LOCATED IN: CUL4 RING ubiquitin ligase co…
9 (1.86-3.56)	DTF-9.1, GDD-9.1,	SD6	Phvul.009G014500	AT1G75640			Leucine-rich receptor-like protein kinase family protein; FUNCTIONS IN: protein serine/threonine kinase activity, kinase activity, ATP binding; INVOLVED IN: transmembrane receptor protein tyrosine kinase signaling pathway, protein amino acid phosphorylation; LOCATED IN: plasma membrane; EXPRESSED IN: 18 plant structures; EXPRESSED DURING: 7 growth stages; CONTAINS InterPro DOMAIN/s: Protein kinas…
9 (1.86-3.56)	DTF-9.1, GDD-9.1,	SD6	Phvul.009G016700	AT1G75730			unknown protein; FUNCTIONS IN: molecular_function unknown; INVOLVED IN: biological_process unknown; EXPRESSED IN: 22 plant structures; EXPRESSED DURING: 12 growth stages.
9 (1.86-3.56)	DTF-9.1, GDD-9.1,	SD6	Phvul.009G011300	AT1G42470			CONTAINS InterPro DOMAIN/s: MAGE protein (InterPro:IPR002190);
9 (1.86-3.56)	DTF-9.1, GDD-9.1,	SD6	Phvul.009G012900	AT1G19740			ATP-dependent protease La (LON) domain protein; FUNCTIONS IN: ATP-dependent peptidase activity; INVOLVED IN: proteolysis; LOCATED IN: chloroplast; EXPRESSED IN: 22 plant structures; EXPRESSED DURING: 13 growth stages; CONTAINS InterPro DOMAIN/s: Peptidase S16, lon N-terminal (InterPro:IPR003111); BEST Arabidopsis thaliana protein match is: ATP-dependent protease La (LON) domain protein (TAIR:AT1G…
9 (1.86-3.56)	DTF-9.1, GDD-9.1,	SD6	Phvul.009G011400	AT1G76360			Protein kinase superfamily protein; FUNCTIONS IN: protein serine/threonine kinase activity, protein kinase activity, kinase activity, ATP binding; INVOLVED IN: protein amino acid phosphorylation; LOCATED IN: chloroplast; EXPRESSED IN: 16 plant structures; EXPRESSED DURING: 9 growth stages; CONTAINS InterPro DOMAIN/s: Protein kinase, ATP binding site (InterPro:IPR017441), Protein kinase, catalytic…
9 (1.86-3.56)	DTF-9.1, GDD-9.1,	SD6	Phvul.009G013500	AT1G75510			Transcription initiation factor IIF, beta subunit; FUNCTIONS IN: RNA polymerase II transcription factor activity, general RNA polymerase II transcription factor activity, catalytic activity, ATP binding, ATP-dependent helicase activity; INVOLVED IN: transcription initiation from RNA polymerase II promoter, transcription from RNA polymerase II promoter; LOCATED IN: mitochondrion, transcription fac…
9 (1.86-3.56)	DTF-9.1, GDD-9.1,	SD6	Phvul.009G013200	AT1G75490			encodes a member of the DREB subfamily A-2 of ERF/AP2 transcription factor family. The protein contains one AP2 domain. There are eight members in this subfamily including DREB2A AND DREB2B that are involved in response to drought.Integrase-type DNA-binding superfamily protein; CONTAINS InterPro DOMAIN/s: DNA-binding, integrase-type (InterPro:IPR016177), Pathogenesis-related transcriptional facto…
9 (1.86-3.56)	DTF-9.1, GDD-9.1,	SD6	Phvul.009G011800	AT1G20670			DNA-binding bromodomain-containing protein; CONTAINS InterPro DOMAIN/s: Bromodomain, conserved site (InterPro:IPR018359), Bromodomain (InterPro:IPR001487); BEST Arabidopsis thaliana protein match is: DNA-binding bromodomain-containing protein (TAIR:AT1G76380.2); Has 11096 Blast hits to 8233 proteins in 323 species: Archae - 0; Bacteria - 121; Metazoa - 4363; Fungi - 1457; Plants - 677; Viruses - …
9 (1.86-3.56)	DTF-9.1, GDD-9.1,	SD6	Phvul.009G012300	AT1G20760			Calcium-binding EF hand family protein; FUNCTIONS IN: calcium ion binding; LOCATED IN: plasma membrane; EXPRESSED IN: 24 plant structures; EXPRESSED DURING: 15 growth stages; CONTAINS InterPro DOMAIN/s: EF-HAND 2 (InterPro:IPR018249), EPS15 homology (EH) (InterPro:IPR000261), EF-hand-like domain (InterPro:IPR011992), Calcium-binding EF-hand (InterPro:IPR002048); BEST Arabidopsis thaliana protein …
9 (1.86-3.56)	DTF-9.1, GDD-9.1,	SD6	Phvul.009G014800	AT1G19900			glyoxal oxidase-related protein; FUNCTIONS IN: molecular_function unknown; INVOLVED IN: biological_process unknown; LOCATED IN: endomembrane system; EXPRESSED IN: root; CONTAINS InterPro DOMAIN/s: Galactose oxidase/kelch, beta-propeller (InterPro:IPR011043), Galactose oxidase, beta-propeller (InterPro:IPR015916), Immunoglobulin E-set (InterPro:IPR014756), Glyoxal oxidase, N-terminal (InterPro:IPR…
9 (1.86-3.56)	DTF-9.1, GDD-9.1,	SD6	Phvul.009G014900	AT1G19900			glyoxal oxidase-related protein; FUNCTIONS IN: molecular_function unknown; INVOLVED IN: biological_process unknown; LOCATED IN: endomembrane system; EXPRESSED IN: root; CONTAINS InterPro DOMAIN/s: Galactose oxidase/kelch, beta-propeller (InterPro:IPR011043), Galactose oxidase, beta-propeller (InterPro:IPR015916), Immunoglobulin E-set (InterPro:IPR014756), Glyoxal oxidase, N-terminal (InterPro:IPR…
9 (1.86-3.56)	DTF-9.1, GDD-9.1,	SD6	Phvul.009G015100	AT1G19880			Regulator of chromosome condensation (RCC1) family protein; CONTAINS InterPro DOMAIN/s: Regulator of chromosome condensation/beta-lactamase-inhibitor protein II (InterPro:IPR009091), Regulator of chromosome condensation, RCC1 (InterPro:IPR000408); BEST Arabidopsis thaliana protein match is: Regulator of chromosome condensation (RCC1) family protein (TAIR:AT5G63860.1); Has 17859 Blast hits to 6314…
9 (1.86-3.56)	DTF-9.1, GDD-9.1,	SD6	Phvul.009G015300	AT1G19860			Zinc finger C-x8-C-x5-C-x3-H type family protein; FUNCTIONS IN: zinc ion binding, nucleic acid binding; INVOLVED IN: biological_process unknown; EXPRESSED IN: 23 plant structures; EXPRESSED DURING: 13 growth stages; CONTAINS InterPro DOMAIN/s: Zinc finger, CCCH-type (InterPro:IPR000571); BEST Arabidopsis thaliana protein match is: Zinc finger C-x8-C-x5-C-x3-H type family protein (TAIR:AT5G66270.1…
9 (1.86-3.56)	DTF-9.1, GDD-9.1,	SD6	Phvul.009G011700	AT4G37420			Domain of unknown function (DUF23); CONTAINS InterPro DOMAIN/s: Protein of unknown function DUF23 (InterPro:IPR008166); BEST Arabidopsis thaliana protein match is: Domain of unknown function (DUF23) (TAIR:AT5G40720.1); Has 241 Blast hits to 241 proteins in 76 species: Archae - 0; Bacteria - 129; Metazoa - 0; Fungi - 0; Plants - 86; Viruses - 0; Other Eukaryotes - 26 (source: NCBI BLink).
9 (1.86-3.56)	DTF-9.1, GDD-9.1,	SD6	Phvul.009G016800	AT1G75750	GASA1		GA-responsive GAST1 protein homolog regulated by BR and GA antagonistically. Possibly involved in cell elongation based on expression data. GAST1 protein homolog 1 (GASA1); CONTAINS InterPro DOMAIN/s: Gibberellin regulated protein (InterPro:IPR003854); BEST Arabidopsis thaliana protein match is: Gibberellin-regulated family protein (TAIR:AT2G18420.1).
9 (1.86-3.56)	DTF-9.1, GDD-9.1,	SD6	Phvul.009G016100	AT1G75680	GH9B7		glycosyl hydrolase 9B7 (GH9B7); FUNCTIONS IN: hydrolase activity, hydrolyzing O-glycosyl compounds, catalytic activity; INVOLVED IN: carbohydrate metabolic process; LOCATED IN: plasma membrane; EXPRESSED IN: 23 plant structures; EXPRESSED DURING: 13 growth stages; CONTAINS InterPro DOMAIN/s: Six-hairpin glycosidase (InterPro:IPR012341), Glycoside hydrolase, family 9, active site (InterPro:IPR0182…
9 (1.86-3.56)	DTF-9.1, GDD-9.1,	SD6	Phvul.009G012000	AT1G20693	HMGB2		Encodes a protein belonging to the subgroup of HMGB (high mobility group B) proteins that have a distinctive DNA-binding motif, the HMG-box domain. The motif confers non-sequence specific interaction with linear DNA and structure-specific binding to distorted DNA sites. The HMGB proteins are involved in the assembly of nucleoprotein complexes. Can be phosphorylated by CK2alpha.high mobility group…
9 (1.86-3.56)	DTF-9.1, GDD-9.1,	SD6	Phvul.009G016200	AT5G42560	HVA22		Abscisic acid-responsive (TB2/DP1, HVA22) family protein; FUNCTIONS IN: molecular_function unknown; INVOLVED IN: biological_process unknown; LOCATED IN: cellular_component unknown; EXPRESSED IN: 24 plant structures; EXPRESSED DURING: 14 growth stages; CONTAINS InterPro DOMAIN/s: TB2/DP1/HVA22 related protein (InterPro:IPR004345); BEST Arabidopsis thaliana protein match is: HVA22-like protein H (A…
9 (1.86-3.56)	DTF-9.1, GDD-9.1,	SD6	Phvul.009G015200	AT1G19870	iqd32		IQ-domain 32 (iqd32); FUNCTIONS IN: calmodulin binding; INVOLVED IN: biological_process unknown; LOCATED IN: cytosol, nucleus, plasma membrane, chloroplast envelope; EXPRESSED IN: 24 plant structures; EXPRESSED DURING: 13 growth stages; CONTAINS InterPro DOMAIN/s: IQ calmodulin-binding region (InterPro:IPR000048); BEST Arabidopsis thaliana protein match is: IQ-domain 31 (TAIR:AT1G74690.1); Has 91…
9 (1.86-3.56)	DTF-9.1, GDD-9.1,	SD6	Phvul.009G009700	AT5G42310			Pentatricopeptide repeat (PPR-like) superfamily protein; LOCATED IN: chloroplast; EXPRESSED IN: 23 plant structures; EXPRESSED DURING: 13 growth stages; CONTAINS InterPro DOMAIN/s: Pentatricopeptide repeat (InterPro:IPR002885); BEST Arabidopsis thaliana protein match is: Pentatricopeptide repeat (PPR) superfamily protein (TAIR:AT3G22470.1); Has 1807 Blast hits to 1807 proteins in 277 species: Arc…
9 (1.86-3.56)	DTF-9.1, GDD-9.1,	SD6	Phvul.009G010700	AT5G42310			Pentatricopeptide repeat (PPR-like) superfamily protein; LOCATED IN: chloroplast; EXPRESSED IN: 23 plant structures; EXPRESSED DURING: 13 growth stages; CONTAINS InterPro DOMAIN/s: Pentatricopeptide repeat (InterPro:IPR002885); BEST Arabidopsis thaliana protein match is: Pentatricopeptide repeat (PPR) superfamily protein (TAIR:AT3G22470.1); Has 1807 Blast hits to 1807 proteins in 277 species: Arc…
9 (1.86-3.56)	DTF-9.1, GDD-9.1,	SD6	Phvul.009G009800	AT5G42320			Zn-dependent exopeptidases superfamily protein; FUNCTIONS IN: metallocarboxypeptidase activity, zinc ion binding; INVOLVED IN: proteolysis; LOCATED IN: membrane; EXPRESSED IN: 22 plant structures; EXPRESSED DURING: 13 growth stages; CONTAINS InterPro DOMAIN/s: Peptidase M14, carboxypeptidase A (InterPro:IPR000834); Has 30201 Blast hits to 17322 proteins in 780 species: Archae - 12; Bacteria - 139…
9 (1.86-3.56)	DTF-9.1, GDD-9.1,	SD6	Phvul.009G010800	AT5G42320			Zn-dependent exopeptidases superfamily protein; FUNCTIONS IN: metallocarboxypeptidase activity, zinc ion binding; INVOLVED IN: proteolysis; LOCATED IN: membrane; EXPRESSED IN: 22 plant structures; EXPRESSED DURING: 13 growth stages; CONTAINS InterPro DOMAIN/s: Peptidase M14, carboxypeptidase A (InterPro:IPR000834); Has 30201 Blast hits to 17322 proteins in 780 species: Archae - 12; Bacteria - 139…
9 (1.86-3.56)	DTF-9.1, GDD-9.1,	SD6	Phvul.009G009900	AT5G42330	MDH9_2		unknown protein; Has 35333 Blast hits to 34131 proteins in 2444 species: Archae - 798; Bacteria - 22429; Metazoa - 974; Fungi - 991; Plants - 531; Viruses - 0; Other Eukaryotes - 9610 (source: NCBI BLink).
9 (1.86-3.56)	DTF-9.1, GDD-9.1,	SD6	Phvul.009G010900	AT5G42330	MDH9_2		unknown protein; Has 35333 Blast hits to 34131 proteins in 2444 species: Archae - 798; Bacteria - 22429; Metazoa - 974; Fungi - 991; Plants - 531; Viruses - 0; Other Eukaryotes - 9610 (source: NCBI BLink).
9 (1.86-3.56)	DTF-9.1, GDD-9.1,	SD6	Phvul.009G015400	AT5G39600	MIJ24_9		39S ribosomal protein. CONTAINS InterPro DOMAIN/s: Ribosomal protein L53, mitochondrial (InterPro:IPR019716); Has 50 Blast hits to 50 proteins in 19 species: Archae - 0; Bacteria - 0; Metazoa - 6; Fungi - 0; Plants - 42; Viruses - 0; Other Eukaryotes - 2 (source: NCBI BLink).
9 (1.86-3.56)	DTF-9.1, GDD-9.1,	SD6	Phvul.009G011200	AT1G20640	NLP4		Plant regulator RWP-RK family protein; CONTAINS InterPro DOMAIN/s: Octicosapeptide/Phox/Bem1p (InterPro:IPR000270), Plant regulator RWP-RK (InterPro:IPR003035); BEST Arabidopsis thaliana protein match is: Plant regulator RWP-RK family protein (TAIR:AT1G76350.1); Has 35333 Blast hits to 34131 proteins in 2444 species: Archae - 798; Bacteria - 22429; Metazoa - 974; Fungi - 991; Plants - 531; Viruse…
9 (1.86-3.56)	DTF-9.1, GDD-9.1,	SD6	Phvul.009G009600		PNRC		PF15365 - Proline-rich nuclear receptor coactivator (PNRC)
9 (1.86-3.56)	DTF-9.1, GDD-9.1,	SD6	Phvul.009G011900	ATCG00020	PSBA		K02703 - photosystem II P680 reaction center D1 protein (psbA)
9 (1.86-3.56)	DTF-9.1, GDD-9.1,	SD6	Phvul.009G017500	AT1G30755	PSI2; PSK SIMULATOR 2		Protein of unknown function (DUF668); CONTAINS InterPro DOMAIN/s: Protein of unknown function DUF668 (InterPro:IPR007700), Protein of unknown function DUF3475 (InterPro:IPR021864); BEST Arabidopsis thaliana protein match is: Protein of unknown function (DUF668) (TAIR:AT1G34320.1); Has 465 Blast hits to 399 proteins in 71 species: Archae - 2; Bacteria - 14; Metazoa - 66; Fungi - 16; Plants - 336; …
9 (1.86-3.56)	DTF-9.1, GDD-9.1,	SD6	Phvul.009G018000	AT1G20110	RING/FYVE/PHD		RING/FYVE/PHD zinc finger superfamily protein; FUNCTIONS IN: phosphoinositide binding; INVOLVED IN: signal transduction; EXPRESSED IN: 24 plant structures; EXPRESSED DURING: 15 growth stages; CONTAINS InterPro DOMAIN/s: Zinc finger, FYVE-type (InterPro:IPR000306), Zinc finger, FYVE-related (InterPro:IPR017455), Zinc finger, FYVE/PHD-type (InterPro:IPR011011); BEST Arabidopsis thaliana protein mat…
9 (1.86-3.56)	DTF-9.1, GDD-9.1,	SD6	Phvul.009G017600	AT1G74620	RING/U		RING/U-box superfamily protein; FUNCTIONS IN: zinc ion binding; CONTAINS InterPro DOMAIN/s: Zinc finger, RING-type (InterPro:IPR001841), Zinc finger, C3HC4 RING-type (InterPro:IPR018957); BEST Arabidopsis thaliana protein match is: RING/U-box superfamily protein (TAIR:AT2G29840.1); Has 10007 Blast hits to 9980 proteins in 284 species: Archae - 0; Bacteria - 0; Metazoa - 2594; Fungi - 843; Plants …
9 (1.86-3.56)	DTF-9.1, GDD-9.1,	SD6	Phvul.009G012400	AT1G20780	SAUL1		Encodes a protein containing a U-box and an ARM domain. Homozygous mutant seedlings have a seedling lethal phenotype with widespread cell death lesions throughout the cotyledons and roots.senescence-associated E3 ubiquitin ligase 1 (SAUL1); FUNCTIONS IN: ubiquitin-protein ligase activity; INVOLVED IN: regulation of chlorophyll catabolic process, regulation of chlorophyll biosynthetic process, lea…
9 (1.86-3.56)	DTF-9.1, GDD-9.1,	SD6	Phvul.009G013700	AT1G19790	SRS7		A member of SHI gene family. Arabidopsis thaliana has ten members that encode proteins with a RING finger-like zinc finger motif. Despite being highly divergent in sequence, many of the SHI-related genes are partially redundant in function and synergistically promote gynoecium, stamen and leaf development in Arabidopsis.SHI-related sequence 7 (SRS7); CONTAINS InterPro DOMAIN/s: Lateral Root Primo…
9 (1.86-3.56)	DTF-9.1, GDD-9.1,	SD6	Phvul.009G014600	AT4G24160			Encodes a soluble lysophosphatidic acid acyltransferase with additional triacylglycerol lipase and phosphatidylcholine hydrolyzing enzymatic activities. Plays a pivotal role in maintaining the lipid homeostasis by regulating both phospholipid and neutral lipid levels.alpha/beta-Hydrolases superfamily protein; CONTAINS InterPro DOMAIN/s: Alpha/beta hydrolase fold-1 (InterPro:IPR000073); BEST Arabi…
9 (1.86-3.56)	DTF-9.1, GDD-9.1,	SD6	Phvul.009G009500	AT1G20060			ATP binding microtubule motor family protein; FUNCTIONS IN: microtubule motor activity, ATP binding; INVOLVED IN: microtubule-based movement; LOCATED IN: chloroplast; CONTAINS InterPro DOMAIN/s: Kinesin, motor region, conserved site (InterPro:IPR019821), Kinesin, motor domain (InterPro:IPR001752); BEST Arabidopsis thaliana protein match is: P-loop containing nucleoside triphosphate hydrolases sup…
9 (1.86-3.56)	DTF-9.1, GDD-9.1,	SD6	Phvul.009G017700	AT1G20030			Pathogenesis-related thaumatin superfamily protein; CONTAINS InterPro DOMAIN/s: Thaumatin, conserved site (InterPro:IPR017949), Thaumatin, pathogenesis-related (InterPro:IPR001938); BEST Arabidopsis thaliana protein match is: Pathogenesis-related thaumatin superfamily protein (TAIR:AT1G75800.1); Has 1614 Blast hits to 1596 proteins in 182 species: Archae - 0; Bacteria - 45; Metazoa - 56; Fungi - …
9 (1.86-3.56)	DTF-9.1, GDD-9.1,	SD6	Phvul.009G017100	AT1G19990			unknown protein; FUNCTIONS IN: molecular_function unknown; INVOLVED IN: biological_process unknown; LOCATED IN: cellular_component unknown; EXPRESSED IN: cultured cell; BEST Arabidopsis thaliana protein match is: unknown protein (TAIR:AT5G11600.1); Has 11256 Blast hits to 7192 proteins in 541 species: Archae - 6; Bacteria - 629; Metazoa - 4714; Fungi - 936; Plants - 545; Viruses - 34; Other Eukar…
9 (1.86-3.56)	DTF-9.1, GDD-9.1,	SD6	Phvul.009G013100	AT1G06060			LisH and RanBPM domains containing protein; CONTAINS InterPro DOMAIN/s: Ran binding protein, CRA domain (InterPro:IPR019589), CTLH, C-terminal LisH motif (InterPro:IPR006595), LisH dimerisation motif (InterPro:IPR006594), Ran binding protein-like, CRA domain (InterPro:IPR013144); BEST Arabidopsis thaliana protein match is: SPla/RYanodine receptor (SPRY) domain-containing protein (TAIR:AT1G35470.2…
9 (1.86-3.56)	DTF-9.1, GDD-9.1,	SD6	Phvul.009G009400	AT4G24200			Transcription elongation factor (TFIIS) family protein; CONTAINS InterPro DOMAIN/s: Transcription factor IIS, N-terminal (InterPro:IPR017923); Has 1174 Blast hits to 562 proteins in 174 species: Archae - 0; Bacteria - 342; Metazoa - 163; Fungi - 176; Plants - 109; Viruses - 0; Other Eukaryotes - 384 (source: NCBI BLink).
9 (1.86-3.56)	DTF-9.1, GDD-9.1,	SD6	Phvul.009G018400	AT1G11320	T28P6_3		GDSL esterase/lipase unknown protein; FUNCTIONS IN: molecular_function unknown; INVOLVED IN: biological_process unknown; LOCATED IN: mitochondrion, plastid; EXPRESSED IN: 7 plant structures; EXPRESSED DURING: C globular stage, F mature embryo stage, petal differentiation and expansion stage, E expanded cotyledon stage, D bilateral stage; Has 46 Blast hits to 46 proteins in 14 species: Archae - 0;…
9 (1.86-3.56)	DTF-9.1, GDD-9.1,	SD6	Phvul.009G018100	AT1G75900	T4O12_13		GDSL-like Lipase/Acylhydrolase superfamily protein; CONTAINS InterPro DOMAIN/s: Lipase, GDSL, active site (InterPro:IPR008265), Lipase, GDSL (InterPro:IPR001087); BEST Arabidopsis thaliana protein match is: SGNH hydrolase-type esterase superfamily protein (TAIR:AT1G75880.2); Has 3444 Blast hits to 3405 proteins in 204 species: Archae - 0; Bacteria - 282; Metazoa - 0; Fungi - 26; Plants - 3125; Vi…
9 (1.86-3.56)	DTF-9.1, GDD-9.1,	SD6	Phvul.009G018200	AT1G75900	T4O12_13		GDSL-like Lipase/Acylhydrolase superfamily protein; CONTAINS InterPro DOMAIN/s: Lipase, GDSL, active site (InterPro:IPR008265), Lipase, GDSL (InterPro:IPR001087); BEST Arabidopsis thaliana protein match is: SGNH hydrolase-type esterase superfamily protein (TAIR:AT1G75880.2); Has 3444 Blast hits to 3405 proteins in 204 species: Archae - 0; Bacteria - 282; Metazoa - 0; Fungi - 26; Plants - 3125; Vi…
9 (1.86-3.56)	DTF-9.1, GDD-9.1,	SD6	Phvul.009G017800	AT1G75810	T4O12_4		unknown protein; FUNCTIONS IN: molecular_function unknown; INVOLVED IN: biological_process unknown; LOCATED IN: endomembrane system; EXPRESSED IN: 24 plant structures; EXPRESSED DURING: 15 growth stages; Has 13 Blast hits to 13 proteins in 5 species: Archae - 0; Bacteria - 0; Metazoa - 0; Fungi - 0; Plants - 13; Viruses - 0; Other Eukaryotes - 0 (source: NCBI BLink).
9 (1.86-3.56)	DTF-9.1, GDD-9.1,	SD6	Phvul.009G017300	AT1G20010	TUB5		tubulin beta-5 chain (TUB5); FUNCTIONS IN: structural constituent of cytoskeleton; INVOLVED IN: microtubule-based process; LOCATED IN: tubulin complex, cell wall, plasma membrane, chloroplast, membrane; EXPRESSED IN: 24 plant structures; EXPRESSED DURING: 13 growth stages; CONTAINS InterPro DOMAIN/s: Beta tubulin (InterPro:IPR002453), Tubulin (InterPro:IPR000217), Tubulin/FtsZ, GTPase domain (Int…
9 (1.86-3.56)	DTF-9.1, GDD-9.1,	SD6	Phvul.009G013400	AT1G75500	WAT1		An Arabidopsis thaliana homolog of Medicago truncatula NODULIN21 (MtN21). The gene encodes a plant-specific, predicted integral membrane protein and is a member of the Plant-Drug/Metabolite Exporter (P-DME) family (Transporter Classification number: TC 2.A.7.3) and the nodulin MtN21-like transporter family.Walls Are Thin 1 (WAT1); INVOLVED IN: positive regulation of auxin metabolic process, posit…
9 (1.86-3.56)	DTF-9.1, GDD-9.1,	SD6	Phvul.009G016600	AT1G75720	WEB		Plant protein of unknown function (DUF827); CONTAINS InterPro DOMAIN/s: Protein of unknown function DUF827, plant (InterPro:IPR008545); BEST Arabidopsis thaliana protein match is: Plant protein of unknown function (DUF827) (TAIR:AT3G51220.1); Has 102 Blast hits to 102 proteins in 18 species: Archae - 0; Bacteria - 0; Metazoa - 1; Fungi - 0; Plants - 92; Viruses - 0; Other Eukaryotes - 9 (source: …
9 (1.86-3.56)	DTF-9.1, GDD-9.1,	SD6	Phvul.009G013000	AT1G09850	XBCP3		xylem bark cysteine peptidase 3 (XBCP3); FUNCTIONS IN: cysteine-type endopeptidase activity, cysteine-type peptidase activity; INVOLVED IN: proteolysis; LOCATED IN: vacuole; EXPRESSED IN: 24 plant structures; EXPRESSED DURING: 15 growth stages; CONTAINS InterPro DOMAIN/s: Peptidase C1A, papain (InterPro:IPR013128), Proteinase inhibitor I29, cathepsin propeptide (InterPro:IPR013201), Granulin (Int…
9 (1.86-3.56)	DTF-9.1, GDD-9.1,	SD6	Phvul.009G018300	AT1G58525			GDSL-like lipase/acylhydrolase superfamily protein. RXW8; FUNCTIONS IN: hydrolase activity, acting on ester bonds, lipase activity; INVOLVED IN: lipid metabolic process; LOCATED IN: endomembrane system; CONTAINS InterPro DOMAIN/s: Lipase, GDSL, active site (InterPro:IPR008265), Lipase, GDSL (InterPro:IPR001087); BEST Arabidopsis thaliana protein match is: GDSL-like Lipase/Acylhydrolase superfamil…
9 (1.86-3.56)	DTF-9.1, GDD-9.1,	SD6	Phvul.009G016500	AT1G75717			unknown protein; FUNCTIONS IN: molecular_function unknown; INVOLVED IN: biological_process unknown; LOCATED IN: cellular_component unknown; Has 30201 Blast hits to 17322 proteins in 780 species: Archae - 12; Bacteria - 1396; Metazoa - 17338; Fungi - 3422; Plants - 5037; Viruses - 0; Other Eukaryotes - 2996 (source: NCBI BLink).
9 (1.86-3.56)	DTF-9.1, GDD-9.1,	SD6	Phvul.009G015500	AT3G27230			S-adenosyl-L-methionine-dependent methyltransferases superfamily protein; CONTAINS InterPro DOMAIN/s: Protein of unknown function DUF248, methyltransferase putative (InterPro:IPR004159); BEST Arabidopsis thaliana protein match is: S-adenosyl-L-methionine-dependent methyltransferases superfamily protein (TAIR:AT5G40830.2); Has 347 Blast hits to 346 proteins in 22 species: Archae - 0; Bacteria - 2;…
9 (1.86-3.56)	DTF-9.1, GDD-9.1,	SD6	Phvul.009G017000	AT5G42146			unknown protein; Has 98 Blast hits to 98 proteins in 12 species: Archae - 0; Bacteria - 0; Metazoa - 0; Fungi - 0; Plants - 98; Viruses - 0; Other Eukaryotes - 0 (source: NCBI BLink).
9 (1.86-3.56)	DTF-9.1, GDD-9.1,	SD6	Phvul.009G011000				PTHR10357:SF110 - PROTEIN T04A8.7, ISOFORM A
9 (1.86-3.56)	DTF-9.1, GDD-9.1,	SD6	Phvul.009G011500				PF14111 - Domain of unknown function (DUF4283) (DUF4283)
9 (1.86-3.56)	DTF-9.1, GDD-9.1,	SD6	Phvul.009G012100				PTHR22893//PTHR22893:SF62 - NADH OXIDOREDUCTASE-RELATED // SUBFAMILY NOT NAMED
9 (1.86-3.56)	DTF-9.1, GDD-9.1,	SD6	Phvul.009G012200				PTHR24326:SF220 - WUSCHEL-RELATED HOMEOBOX 13
9 (1.86-3.56)	DTF-9.1, GDD-9.1,	SD6	Phvul.009G012600
9 (1.86-3.56)	DTF-9.1, GDD-9.1,	SD6	Phvul.009G012800				PTHR10438:SF274 - THIOREDOXIN H1
9 (1.86-3.56)	DTF-9.1, GDD-9.1,	SD6	Phvul.009G013300
9 (1.86-3.56)	DTF-9.1, GDD-9.1,	SD6	Phvul.009G013600				3.4.22.15 - Cathepsin L
9 (1.86-3.56)	DTF-9.1, GDD-9.1,	SD6	Phvul.009G013800				PTHR31269:SF9 - S-TYPE ANION CHANNEL SLAH1-RELATED
9 (1.86-3.56)	DTF-9.1, GDD-9.1,	SD6	Phvul.009G014200
9 (1.86-3.56)	DTF-9.1, GDD-9.1,	SD6	Phvul.009G014300				KOG2385 - Uncharacterized conserved protein
9 (1.86-3.56)	DTF-9.1, GDD-9.1,	SD6	Phvul.009G014400				PTHR24115:SF514 - ATP BINDING MICROTUBULE MOTOR FAMILY PROTEIN
9 (1.86-3.56)	DTF-9.1, GDD-9.1,	SD6	Phvul.009G015600				PTHR31374:SF34 - F6F9.11 PROTEIN-RELATED
9 (1.86-3.56)	DTF-9.1, GDD-9.1,	SD6	Phvul.009G015800				PF08646 - Replication factor-A C terminal domain (Rep_fac-A_C)
9 (1.86-3.56)	DTF-9.1, GDD-9.1,	SD6	Phvul.009G015900				K14488 - SAUR family protein (SAUR)
9 (1.86-3.56)	DTF-9.1, GDD-9.1,	SD6	Phvul.009G016000				K06966 - uncharacterized protein (K06966)
9 (1.86-3.56)	DTF-9.1, GDD-9.1,	SD6	Phvul.009G016400				K09659 - dolichyl-phosphate mannosyltransferase polypeptide 3 (DPM3)
9 (1.86-3.56)	DTF-9.1, GDD-9.1,	SD6	Phvul.009G016900				K10949 - ER lumen protein retaining receptor (KDELR)
9 (1.86-3.56)	DTF-9.1, GDD-9.1,	SD6	Phvul.009G017200
9 (1.86-3.56)	DTF-9.1, GDD-9.1,	SD6	Phvul.009G017400				PF12776 - Myb/SANT-like DNA-binding domain (Myb_DNA-bind_3)
9 (1.86-3.56)	DTF-9.1, GDD-9.1,	SD6	Phvul.009G018700		FDc		PTHR22952:SF95 - ATBZIP TRANSCRIPTION FACTOR-RELATED
9 (30.99-31.06)	DTF-9.4, GDD-9.3, PS-9.3, ePS-9.3, eGDD-9.3, eClass-9.3, eRRP-9.3,	SD1, SD6, 2013, 2015	Phvul.009G204500	AT5G15740			O-fucosyltransferase family protein; CONTAINS InterPro DOMAIN/s: GDP-fucose protein O-fucosyltransferase (InterPro:IPR019378); BEST Arabidopsis thaliana protein match is: O-fucosyltransferase family protein (TAIR:AT3G02250.1
9 (30.99-31.06)	DTF-9.4, GDD-9.3, PS-9.3, ePS-9.3, eGDD-9.3, eClass-9.3, eRRP-9.3,	SD1, SD6, 2013, 2015	Phvul.009G204600				E1 family genes from legumes
9 (30.99-31.06)	DTF-9.4, GDD-9.3, PS-9.3, ePS-9.3, eGDD-9.3, eClass-9.3, eRRP-9.3,	SD1, SD6, 2013, 2015	Phvul.009G204700	AT5G57910
9 (30.86-30.84)	DTF-9.5, PRI-9.4, Class-9.4, PS-9.4, RRP-9.4	SD1, SD6, 2013, 2015	Phvul.009G203300	AT3G08900	RGP3		UDP-arabinose mutase that catalyzes the interconversion between the pyranose and furanose forms of UDP-L-arabinose. It is a reversibly autoglycosylated protein. Fluorescently-tagged RGP3 is found in the cytosol and associated with Golgi-like particles when expressed in tobacco leaves. An RGP3-YFP fusion protein under the control a native promoter can be found in the endosperm of Arabidopsis embry…
9 (30.86-30.84)	DTF-9.5, PRI-9.4, Class-9.4, PS-9.4, RRP-9.4	SD1, SD6, 2013, 2015	Phvul.009G203400	AT5G60910	AGL8		MADS box gene negatively regulated by APETALA1. AGAMOUS-like 8 (AGL8); FUNCTIONS IN: sequence-specific DNA binding transcription factor activity; INVOLVED IN: positive regulation of flower development, maintenance of inflorescence meristem identity, fruit development; LOCATED IN: nucleus; EXPRESSED IN: 19 plant structures; EXPRESSED DURING: 8 growth stages; CONTAINS InterPro DOMAIN/s: Transcripti…
