# Supplementary material for: Characterization of QTL and Environmental Interactions Controlling Flowering Time in Andean Common Bean (Phaseolus vulgaris L.)
Source: Front Plant Sci. 2021 Jan 14;11:599462. doi: 10.3389/fpls.2020.599462 (PMC7840541; doi:10.3389/fpls.2020.599462)
Supplement: Supplementary file 3 [file Table_2.XLSX]

## Sheet: Supplemental Table S3
Table S3. Genotypic data and DTF means for the 185 RILs used for the QTL analysis (Marker codes: PHA1037=0, BOLITA=2, F1=1, F1PHA1037=10, F1BOLITA=12; DTF= days to flowering time means for each RIL in each trial (SD1, SD2, SD3, SD4, SD5, SD6, LD1, LD2, LD3, LD4, LD5, LD6).
Genotype	RIL001	RIL002	RIL003	RIL004	RIL005	RIL006	RIL007	RIL008	RIL009	RIL010	RIL011	RIL012	RIL013	RIL014	RIL015	RIL016	RIL017	RIL018	RIL019	RIL020	RIL021	RIL022	RIL023	RIL024	RIL025	RIL026	RIL027	RIL028	RIL029	RIL030	RIL031	RIL032	RIL033	RIL034	RIL035	RIL036	RIL037	RIL038	RIL039	RIL040	RIL041	RIL042	RIL043	RIL044	RIL045	RIL046	RIL047	RIL048	RIL049
PvALC	0	0	0	0	0	0	0	2	.	2	2	2	2	2	2	0	2	0	0	2	2	2	0	0	0	2	0	2	0	0	0	0	2	2	0	0	2	2	0	0	0	0	0	0	2	0	2	0	2
SNP-5503	2	2	2	0	0	0	2	2	2	2	1	2	2	2	2	2	2	2	2	2	2	2	2	2	2	2	2	2	2	2	2	2	2	2	2	2	2	2	2	2	2	2	2	2	2	2	2	2	2
E32M60-114	0	0	0	0	0	0	0	12	12	0	12	12	12	12	12	0	12	0	0	0	12	12	12	0	0	12	12	12	12	0	0	12	12	12	0	0	0	12	0	0	0	0	0	0	0	0	12	0	12
E32M60-147	10	10	10	10	10	10	10	2	2	10	2	2	2	2	2	10	2	10	10	10	10	2	2	10	10	2	2	2	2	10	10	10	2	2	10	10	10	2	10	10	10	10	10	10	10	10	2	10	2
PvFTa1	0	0	0	0	0	0	0	0	0	0	2	2	2	2	2	0	2	0	0	0	0	0	2	2	2	2	2	2	2	0	0	0	2	2	2	2	2	2	0	2	1	2	2	2	0	0	0	0	2
PvFTc	0	0	0	0	0	0	0	0	0	0	2	2	2	2	2	0	2	0	0	0	0	0	2	2	2	2	2	2	2	0	0	0	2	2	2	2	2	2	0	2	12	2	2	0	0	0	0	0	2
BM200	0	0	0	0	0	0	0	0	0	0	2	2	2	2	2	0	2	0	2	2	0	0	0	0	0	2	2	2	2	0	0	1	2	2	2	2	2	2	0	2	2	2	2	0	0	0	0	0	2
E43M38-138	10	10	10	10	10	10	10	10	10	10	2	2	2	2	2	10	10	10	10	0	10	0	10	10	2	10	2	2	2	10	10	10	2	2	2	2	2	2	10	2	2	2	2	10	10	10	10	10	2
E43M38-137	0	0	0	0	0	0	0	0	0	0	12	12	12	12	12	0	0	0	0	0	12	0	0	0	12	12	12	12	12	0	0	12	12	12	12	12	12	12	0	12	12	12	12	0	0	0	0	0	12
BMb256	0	0	0	0	0	0	0	0	0	0	2	2	2	2	2	0	2	0	0	0	1	0	2	0	2	2	2	2	2	0	0	2	2	2	2	2	2	2	0	2	2	2	2	0	0	0	0	0	2
FJ51	0	0	0	0	0	0	0	0	0	0	2	2	2	2	2	0	2	0	0	0	1	0	2	0	2	2	2	2	2	0	0	1	2	2	2	2	2	2	0	2	2	2	2	0	0	0	0	0	2
BMc344	0	0	0	0	0	0	0	0	0	0	2	2	2	2	2	0	2	0	0	0	0	0	2	0	2	2	2	2	2	0	0	1	2	2	2	2	2	2	0	2	2	2	2	0	0	0	0	0	2
PvCh01-10.6	0	0	0	0	0	0	0	0	0	0	2	2	2	2	2	0	2	0	0	0	0	0	2	0	2	2	2	2	2	0	0	1	2	2	2	2	2	2	0	2	2	2	2	0	0	0	0	0	2
BM53	0	0	0	0	0	0	0	0	0	0	2	2	2	2	2	0	2	0	0	0	0	0	2	0	2	2	2	2	2	0	0	1	2	2	2	2	2	2	0	2	2	2	2	0	0	0	0	0	2
IAC93	0	0	0	0	0	0	0	0	0	0	2	2	2	2	2	0	2	0	0	0	1	0	2	0	2	2	2	2	2	0	0	1	2	2	2	2	2	2	0	2	2	2	2	2	2	2	2	0	2
E31M50-264	10	10	10	10	10	10	10	10	10	10	2	2	2	2	2	10	2	10	10	10	2	2	2	10	2	2	2	2	2	10	10	10	2	2	2	2	2	2	10	2	2	2	2	2	2	2	2	10	2
BMb290	0	0	0	0	0	0	0	0	0	0	2	2	2	2	2	0	2	0	0	0	2	2	2	0	2	2	2	2	2	0	0	1	2	2	2	2	2	2	0	2	2	2	2	2	2	2	2	0	2
E31M51-297	10	10	10	10	2	10	10	10	10	10	2	2	2	2	2	10	2	10	10	10	2	2	2	10	2	2	2	2	2	10	10	10	2	2	2	2	2	2	10	2	2	2	2	2	2	2	2	10	2
E31M51-298	0	0	0	0	0	0	0	0	0	0	12	12	12	12	12	0	12	0	0	0	12	12	12	0	12	12	12	12	12	0	0	12	12	12	12	12	12	12	0	12	12	12	12	12	12	12	12	0	12
BMb213	0	0	0	0	0	0	0	0	0	0	1	2	1	2	2	0	2	0	0	0	0	0	1	0	2	2	2	2	1	0	0	1	2	2	2	2	1	2	0	2	2	2	2	2	2	2	2	0	2
SNP-4423	0	0	1	1	0	0	0	2	2	0	2	2	2	1	2	0	2	0	0	0	2	2	0	0	2	0	2	2	0	0	0	1	2	2	2	2	2	2	0	2	2	2	2	2	2	2	0	0	0
PVEST270	0	0	1	0	0	0	0	2	2	0	2	0	0	0	0	0	2	0	0	0	2	2	0	0	2	0	0	0	1	0	0	1	2	2	2	2	2	2	0	2	2	2	2	0	0	0	0	0	0
IAC21	0	0	2	1	0	0	0	2	2	0	2	0	0	0	0	0	2	0	0	0	2	2	0	0	2	0	0	0	2	0	0	1	2	2	2	2	2	2	0	2	2	2	2	0	0	0	0	0	0
PvFin	0	0	2	2	0	0	0	2	2	0	0	0	0	0	0	0	2	0	0	0	2	2	2	2	2	0	1	0	2	0	0	0	2	2	2	2	2	2	0	2	2	2	2	0	0	0	0	0	0
PvPHYA3	0	0	2	2	2	2	2	0	.	0	0	0	0	0	0	0	2	0	0	0	2	2	2	2	2	0	2	0	2	0	0	0	0	2	0	0	0	0	0	2	2	2	2	0	0	0	0	0	0
BMc324	0	0	0	2	2	2	2	0	0	0	2	0	0	0	0	0	2	0	0	0	2	2	2	0	2	0	2	0	1	2	0	0	0	2	0	2	0	0	0	2	2	2	2	0	0	0	0	0	0
E36M31-121	2	10	10	10	2	2	2	10	10	2	10	10	10	10	10	10	10	10	10	10	10	10	2	10	10	10	2	10	10	10	10	10	10	2	10	2	10	10	10	2	2	2	2	10	10	10	10	10	10
E36M31-83	12	0	0	0	12	12	12	0	0	12	0	0	0	0	0	0	12	0	0	0	0	0	12	0	0	0	12	0	0	0	0	0	0	12	0	12	0	0	0	12	12	12	12	0	0	0	0	0	0
PVEST076	2	0	0	0	2	2	2	0	0	2	0	0	0	0	0	0	1	0	0	0	0	0	2	0	0	0	2	0	0	0	0	0	0	2	0	2	0	0	0	2	2	2	2	0	0	0	0	0	0
E32M51-329	2	10	10	10	2	2	2	10	10	2	10	10	10	10	10	10	2	2	2	2	10	10	2	10	10	10	2	10	10	10	10	10	10	10	10	2	10	10	10	2	2	2	2	10	10	10	10	10	10
E32M51-335	12	0	0	12	12	12	12	0	0	12	0	0	0	0	0	0	12	0	12	12	0	0	12	0	0	0	12	0	0	0	0	0	0	12	0	12	0	0	0	12	12	12	12	0	0	0	0	0	0
PVEST221	12	0	0	12	12	12	12	0	0	12	0	0	0	0	0	0	0	0	12	12	0	0	12	0	0	0	12	0	12	0	0	0	0	12	0	12	0	0	0	12	12	12	12	0	0	0	0	0	0
BMb356	12	0	0	12	12	12	12	0	0	12	0	0	0	0	0	0	0	0	12	12	0	0	12	0	0	0	0	0	12	0	0	0	0	12	0	12	0	0	0	12	12	12	12	0	0	0	0	0	0
PvM97	0	0	0	0	2	2	2	0	0	2	0	0	0	0	0	0	0	2	2	2	0	0	2	0	0	0	2	0	2	0	0	0	0	1	0	2	0	0	0	2	2	2	0	0	0	0	0	0	0
E31M31-258	10	10	10	10	2	2	2	10	10	2	10	10	10	10	10	10	10	2	2	2	10	10	2	10	10	10	2	10	2	10	10	10	10	10	10	2	10	10	10	2	2	2	10	10	10	10	10	10	10
E31M31-273	0	0	0	0	12	12	12	0	0	12	0	0	0	0	0	0	0	12	12	12	0	12	12	0	0	0	12	0	12	0	0	0	0	12	0	12	.	0	0	12	12	12	0	0	0	0	0	0	0
E31M61-150	2	10	10	10	2	2	2	10	10	2	10	2	10	10	10	2	10	10	2	2	10	2	2	10	10	10	2	10	10	10	10	10	10	10	10	2	2	10	10	2	2	2	2	10	10	10	10	10	10
E36M38-71	0	12	12	0	12	12	12	0	12	12	0	0	0	0	0	0	0	12	0	0	0	0	12	12	0	12	12	0	12	0	12	12	12	12	12	12	12	12	12	0	0	0	0	12	12	12	12	12	0
E42M60-192	12	12	12	12	12	12	12	0	0	12	0	0	0	0	0	12	12	12	0	0	0	0	12	12	0	12	12	0	0	0	12	12	12	12	12	12	12	12	12	0	0	0	0	12	0	12	12	12	0
GATS91	2	0	0	1	0	0	0	2	0	2	0	0	0	0	0	0	0	0	0	0	0	0	2	2	0	2	2	0	0	0	0	0	0	0	0	0	2	0	0	2	2	2	2	0	0	2	2	0	0
BMc367	2	2	2	2	2	2	2	2	0	2	0	0	0	0	0	0	0	0	0	0	0	0	2	2	0	0	2	0	2	0	0	0	0	2	0	0	2	2	0	2	2	2	2	0	0	0	0	0	2
SW13	12	0	0	12	12	12	12	12	12	12	12	12	12	12	12	12	12	0	0	0	0	0	12	0	0	12	12	12	12	0	0	0	0	0	0	0	0	0	0	0	0	0	0	0	0	0	12	12	12
E31M50-104	2	2	10	2	10	10	2	10	10	2	10	10	10	10	10	10	10	2	10	10	10	2	2	2	10	10	2	10	2	10	10	10	10	10	10	10	2	10	10	2	2	2	2	10	10	10	10	10	2
Chr02.48.5	2	0	0	2	2	2	2	1	1	2	1	2	2	2	2	1	2	1	0	0	0	0	2	0	0	2	2	2	2	0	0	0	0	0	0	0	0	0	0	0	0	0	0	0	0	0	1	1	0
Chr02.26.8	2	2	2	2	0	0	2	0	0	2	0	0	0	2	0	0	0	0	0	0	0	0	2	2	0	0	2	0	2	0	0	0	0	0	0	0	2	0	0	2	2	2	2	0	0	0	0	0	2
PvM115	2	2	1	2	0	0	2	0	0	2	0	0	0	1	0	0	0	2	0	0	0	0	2	2	0	0	2	0	2	0	0	0	0	0	0	0	2	0	0	2	2	2	2	0	0	0	0	0	2
Chr02.30.7	0	0	1	0	0	0	2	0	0	2	0	0	0	0	0	0	0	2	0	0	0	0	2	2	0	0	2	0	2	0	0	0	0	0	0	0	2	0	0	2	2	2	2	0	0	0	0	0	2
Chr02.32.2	0	0	1	0	0	0	2	0	0	2	2	0	0	0	0	0	0	2	0	0	0	0	2	2	0	0	2	0	1	0	0	0	0	0	0	0	2	0	0	0	0	0	0	0	0	0	0	0	2
Chr02.33.8	0	0	0	0	0	0	2	0	0	2	2	0	0	0	0	0	0	2	0	0	0	0	2	0	0	0	2	0	2	0	0	0	0	0	0	0	2	0	0	0	0	0	0	0	0	0	0	0	2
E31M51-161	0	0	0	0	0	0	12	0	0	12	12	0	0	12	12	0	0	12	0	12	0	12	12	0	12	0	0	0	12	0	0	0	0	12	0	0	12	12	0	0	0	0	0	0	0	0	0	0	12
E31M51-162	10	10	10	10	10	10	2	10	10	2	2	10	10	10	10	10	10	2	10	2	10	2	2	10	10	10	10	10	2	10	10	10	10	10	10	10	2	2	10	10	10	10	10	10	10	10	10	10	2
BMc210	1	0	0	0	0	0	2	0	0	2	2	0	0	0	0	0	0	2	0	0	0	0	2	0	0	0	0	0	2	0	0	0	0	0	0	0	2	1	0	0	0	0	0	0	0	0	0	0	2
BM221	0	0	0	0	0	0	2	0	0	2	2	0	0	0	0	0	0	2	0	0	0	0	2	0	0	0	0	0	2	0	0	0	0	0	0	0	2	1	0	0	0	0	0	0	0	0	0	0	2
E36M34-68	0	0	0	0	0	0	0	0	0	12	12	0	0	12	0	0	0	12	0	0	0	0	12	0	0	0	0	0	0	0	12	0	0	0	0	0	12	12	0	0	0	0	0	0	0	0	0	0	12
SNP-3999	0	0	0	0	0	0	0	0	0	2	2	0	0	1	0	0	0	0	0	0	0	0	2	0	0	0	0	0	0	0	0	0	0	0	0	0	2	1	0	0	0	0	0	0	0	0	0	0	2
E36M37-249	0	0	0	0	0	0	0	0	0	12	12	0	0	12	0	0	0	12	0	0	0	0	12	0	0	0	0	0	0	0	0	0	0	0	12	0	12	0	0	0	0	0	12	0	0	0	0	0	12
E31M50-139	10	10	10	10	10	10	10	10	10	2	2	10	10	10	10	10	10	2	10	10	10	10	2	10	10	10	10	10	10	10	10	10	10	10	2	10	10	10	10	10	10	10	2	10	10	10	10	10	2
E45M38-66	0	12	12	0	0	0	0	0	0	12	12	0	0	0	0	0	0	0	0	12	0	12	12	0	0	12	0	0	0	0	0	0	0	0	0	0	0	0	0	0	0	0	0	0	0	0	12	0	12
LEG-735	0	2	1	0	0	0	0	0	0	2	2	0	0	0	0	0	0	2	0	0	0	0	2	0	0	2	0	0	0	0	0	0	0	0	0	0	0	0	0	0	0	0	0	0	0	0	2	0	0
BMc280	0	2	1	0	0	0	0	0	0	2	2	0	0	0	0	2	0	2	0	0	0	0	2	0	0	2	0	0	0	0	0	0	0	0	0	0	0	0	0	0	0	0	0	0	0	0	2	0	0
PVEST008	0	2	1	0	0	0	0	0	0	2	2	0	0	0	0	2	0	2	0	0	0	0	2	0	0	2	0	0	0	0	0	0	0	0	0	0	0	0	0	0	0	0	0	0	0	0	2	0	0
BM139	0	0	0	0	0	0	0	0	0	0	0	0	0	0	0	2	0	2	0	0	0	0	0	0	0	2	0	0	1	0	0	0	0	0	0	0	0	0	0	0	0	0	0	0	0	0	2	0	0
BM164	0	0	0	0	0	0	0	0	0	0	0	0	0	0	0	2	0	2	0	0	0	0	0	0	0	2	0	0	0	0	0	0	0	0	0	0	0	0	0	0	0	0	0	0	0	0	2	0	0
BM172	0	0	0	0	0	0	0	0	0	0	0	0	0	0	0	2	0	2	0	0	0	0	0	0	0	2	0	0	0	0	0	0	0	0	0	0	0	0	0	0	0	0	0	0	0	0	2	0	0
Chr02.44.02	0	0	0	0	0	0	0	0	0	0	0	0	0	0	0	2	0	2	0	0	0	0	0	0	0	0	0	0	0	0	0	0	0	0	0	0	0	0	0	0	0	0	0	0	0	0	2	0	0
Pv002G263900	0	2	0	0	0	0	0	0	0	0	0	0	0	0	0	2	0	2	0	0	0	0	0	0	0	2	0	0	0	0	0	0	0	0	0	0	0	0	0	0	0	0	0	0	0	0	2	0	0
Pv002G266500	0	2	0	0	0	0	0	0	0	0	0	0	0	0	0	2	0	2	0	0	0	0	0	0	0	2	0	0	0	0	0	0	0	0	0	0	0	0	0	0	0	0	0	0	0	0	2	0	0
Chr02.43.06	0	2	0	0	0	0	0	0	0	0	0	0	0	0	0	2	0	2	0	0	0	0	0	0	0	2	0	0	0	0	0	0	0	0	0	0	0	0	0	0	0	0	0	0	0	0	2	0	0
Pv002G264300	0	2	0	1	0	0	0	0	0	0	0	0	0	0	0	2	0	2	0	0	0	0	0	0	0	2	0	0	0	0	0	0	0	0	0	0	0	0	0	0	0	0	0	0	0	0	2	0	0
Chr02.43.32	0	2	0	0	0	0	0	0	0	0	0	0	0	0	0	2	0	2	0	0	0	0	0	0	0	0	0	0	0	0	0	0	0	0	0	0	0	0	0	0	0	0	0	0	0	0	2	0	0
Chr02.42.65	0	2	0	0	0	0	2	2	0	0	0	0	0	0	0	2	0	2	0	0	0	0	0	0	0	0	0	0	0	0	0	0	0	0	0	0	0	0	0	0	0	0	0	0	0	0	2	0	0
Chr02.42.34	0	2	2	0	0	0	0	0	0	0	2	0	0	0	0	2	0	2	0	0	0	0	0	0	0	0	0	0	0	0	0	0	0	0	0	0	0	0	0	0	0	0	0	0	0	0	2	0	0
Chr02.42.26	0	2	2	0	0	0	0	0	0	0	0	0	0	0	0	2	0	2	0	0	0	0	0	0	0	0	0	0	0	0	0	0	0	0	0	0	0	0	0	0	0	0	0	0	0	0	2	0	0
Chr02.42.23	0	2	2	0	0	0	0	0	0	0	0	0	0	0	0	2	0	2	0	0	0	0	0	0	0	0	0	0	0	0	0	0	0	0	0	0	0	0	0	0	0	0	0	0	0	0	2	0	0
Chr02.42.10	0	2	2	0	0	0	0	0	0	0	2	0	0	0	0	0	0	2	0	0	0	0	0	0	0	0	0	0	0	0	0	0	0	0	0	0	0	0	0	0	0	0	0	0	0	0	0	0	0
Chr02.41.99	0	2	2	0	0	0	0	0	0	0	2	0	0	0	0	0	0	1	0	0	0	0	0	0	0	0	0	0	0	0	0	0	0	0	0	0	0	0	0	0	0	0	0	0	0	0	2	0	0
Chr02.42.01	0	2	2	0	0	0	0	0	0	0	1	0	0	0	0	0	0	2	0	0	0	0	0	0	0	0	0	0	0	0	0	0	0	0	0	0	0	0	0	0	0	0	0	0	0	0	2	0	0
PvAG2b	0	2	2	0	0	0	0	0	0	0	0	0	0	0	0	0	0	0	0	0	0	0	0	0	0	0	0	0	0	0	0	0	0	0	0	0	0	0	0	0	0	0	0	0	0	0	2	0	2
PvAG2a	0	2	0	0	0	0	0	0	0	0	0	0	0	0	0	0	0	0	0	0	0	0	0	0	0	0	0	0	0	0	0	0	0	0	0	0	0	0	0	0	0	0	0	0	0	0	2	2	2
Chr02.42.12	0	2	2	0	0	0	0	0	0	0	0	0	0	0	0	0	0	2	0	0	0	0	0	0	0	2	0	0	0	0	0	0	0	0	0	0	0	0	0	0	0	0	0	0	0	0	2	0	0
BM265	10	2	2	10	2	2	2	2	2	10	2	10	2	10	10	10	10	2	10	10	10	10	2	10	10	2	2	.	10	10	10	2	2	10	10	2	10	10	10	10	10	10	10	10	10	10	10	10	10
BM234	10	2	2	10	2	2	2	2	10	10	10	10	10	10	10	10	10	2	10	10	10	10	2	10	10	10	2	10	2	10	10	2	2	10	10	2	10	10	10	10	10	10	10	10	10	10	10	10	10
PvM126	0	0	1	0	0	0	0	0	0	0	0	0	0	0	0	0	0	2	0	0	0	0	2	0	0	1	2	1	2	2	0	2	2	1	0	2	1	0	0	0	0	0	0	0	0	0	2	2	0
PvM82	0	0	2	0	0	0	0	0	0	0	0	0	0	0	0	0	0	2	0	0	0	0	2	0	0	1	2	0	2	2	0	2	2	1	0	2	0	0	0	0	0	0	0	0	0	0	2	2	0
BM287	0	1	1	0	0	0	0	0	0	2	0	1	0	1	0	2	0	2	0	0	0	0	2	0	0	1	2	0	2	0	0	2	2	1	.	2	0	0	0	0	0	0	0	0	0	0	2	2	0
IAC024	0	0	0	0	2	1	0	2	2	0	2	2	2	0	0	2	0	0	2	0	1	2	2	0	2	0	2	0	2	2	0	2	2	2	2	2	2	2	0	0	0	0	0	0	0	0	2	2	2
BMc259	0	0	1	1	2	1	2	0	0	2	0	2	0	1	0	2	0	0	2	2	1	2	2	0	2	0	2	0	2	0	.	2	2	2	2	2	2	2	0	0	0	0	0	0	0	0	2	2	2
PvM152a	0	0	1	1	2	1	2	0	0	2	0	2	0	0	0	2	0	0	2	2	1	2	2	0	2	0	2	0	2	0	0	2	2	2	2	2	2	2	0	0	0	0	0	0	0	0	2	2	2
E36M34-97	10	10	10	10	2	10	2	10	10	2	10	10	10	10	10	10	10	10	2	2	2	2	2	10	2	10	2	10	2	10	10	2	2	2	2	2	2	2	10	10	10	10	10	10	10	10	2	2	2
PvCh03-23.5	0	0	0	0	2	2	2	0	0	2	0	0	0	1	0	2	0	0	2	2	2	2	2	2	2	0	2	0	2	0	0	2	2	2	2	2	2	2	0	0	0	0	0	0	0	0	2	2	2
BMd1	0	0	0	0	2	1	2	0	0	2	0	0	0	0	0	2	0	0	2	2	1	2	2	2	2	0	2	0	2	0	0	2	2	2	2	2	2	2	2	0	0	0	0	0	0	0	2	2	2
PVEST042	0	0	0	0	2	2	2	0	0	2	0	0	0	0	0	2	0	0	2	2	2	2	2	2	2	2	2	0	2	0	0	2	2	2	2	2	2	2	0	0	0	0	0	0	0	0	2	2	2
BMc241	0	0	0	0	2	1	2	0	0	2	0	0	0	0	0	2	0	0	2	2	1	2	2	2	2	2	2	0	2	2	0	2	2	2	2	2	2	2	0	0	0	0	0	0	0	0	2	2	2
BM181	2	2	2	1	0	0	0	0	0	2	0	1	2	0	0	0	0	0	2	2	1	2	2	2	2	2	2	1	2	0	0	1	2	2	2	2	2	2	0	0	0	0	0	0	0	0	2	2	2
E36M38-132	2	2	2	2	10	10	10	10	10	2	10	10	2	10	10	10	10	10	2	2	10	2	2	2	2	2	2	10	2	2	10	10	2	2	2	2	2	2	10	10	10	10	10	10	10	10	2	2	2
E36M38-133	12	12	12	12	0	0	0	0	0	12	0	0	12	0	0	0	0	0	12	12	12	12	12	12	12	12	12	12	12	12	0	12	12	12	12	12	12	12	0	0	0	0	0	0	0	0	12	12	12
E36M31-181	10	2	2	2	10	10	10	10	10	2	10	10	2	10	10	10	10	10	2	2	2	10	2	2	2	2	2	10	2	2	10	10	2	2	2	2	2	2	10	2	2	2	2	10	10	10	2	2	2
PVEST309	0	2	2	1	0	0	2	0	0	2	0	1	2	0	0	2	0	0	2	2	1	2	2	2	2	2	2	1	2	0	0	2	2	2	2	2	2	2	0	2	2	2	2	0	0	0	2	2	2
BM159	0	2	2	1	0	0	0	0	0	2	0	1	2	0	0	0	0	0	2	2	1	2	2	2	2	0	2	1	2	0	0	1	2	2	2	2	2	2	0	2	2	2	2	0	0	0	0	2	2
E31M51-60	10	2	2	2	10	10	10	10	10	2	10	2	2	10	10	10	10	10	10	10	2	2	10	2	2	2	2	10	2	2	10	10	2	2	2	2	2	2	10	2	2	2	2	10	10	2	2	2	2
E31M51-55	0	12	12	12	0	0	0	0	0	12	0	12	12	0	0	0	0	0	0	0	12	12	0	12	12	12	12	12	12	12	0	12	12	12	12	12	12	12	0	12	12	12	12	0	0	12	12	12	12
PvCh03-43.3	0	12	12	12	0	0	0	0	0	12	0	12	0	0	0	0	0	0	0	0	12	12	0	12	12	12	12	0	12	0	0	12	12	12	12	12	12	12	0	12	12	12	12	0	12	12	12	12	12
E45M50-389	0	12	12	12	0	0	0	0	0	12	0	12	0	0	0	0	0	0	0	0	0	12	0	12	12	12	12	12	0	0	12	12	12	12	12	12	12	12	12	12	12	12	12	0	12	12	12	12	12
BM189	0	2	2	1	0	0	0	0	0	2	0	0	0	0	0	0	0	0	0	0	0	0	0	2	2	2	2	0	0	0	2	2	2	2	2	2	2	2	2	2	2	2	2	0	2	2	2	2	2
IAC020	2	0	0	0	0	0	0	0	2	0	0	0	0	0	0	2	0	0	0	0	0	0	0	2	0	2	0	0	0	0	2	2	2	2	2	2	2	2	2	0	0	0	0	0	0	0	2	2	2
SNP-4564	12	12	12	12	0	12	12	12	12	12	12	12	0	12	12	12	12	12	12	12	0	12	12	12	12	12	12	12	0	0	12	12	12	12	12	12	0	0	0	12	12	12	12	12	0	12	12	12	12
BSNP-49	2	2	2	0	0	.	2	2	2	2	2	0	0	2	2	2	2	2	2	2	0	2	2	2	2	2	2	2	0	0	2	2	2	2	2	2	0	2	2	2	2	2	2	2	2	2	2	2	2
SNP-5856	2	2	2	2	0	0	2	2	0	2	2	2	0	2	2	2	2	2	2	2	0	2	2	2	2	2	2	2	2	0	2	2	2	2	2	2	2	2	2	2	2	2	2	2	2	2	2	2	0
Chr04.16.04	2	2	2	2	2	2	2	2	.	2	2	2	2	2	0	2	2	2	0	0	0	2	0	0	2	0	2	2	2	0	2	2	0	0	2	2	2	2	0	2	2	2	2	2	2	2	2	2	0
BMc155	12	12	12	12	0	12	12	12	12	12	12	12	0	12	12	12	12	12	12	12	0	12	12	12	12	12	12	12	12	0	12	12	12	12	12	12	12	12	12	12	12	12	12	12	12	12	12	12	0
Pv04G048200	2	1	2	2	2	2	2	2	.	2	2	2	2	2	2	2	2	2	2	2	2	2	2	2	2	2	0	1	0	0	2	2	2	2	2	2	2	2	2	2	2	2	2	2	2	2	2	1	0
BM68	2	2	2	2	1	2	2	2	0	2	2	2	2	1	2	2	2	2	2	2	0	2	2	2	2	2	2	2	2	0	2	2	2	2	2	2	2	2	2	2	2	2	2	2	2	2	2	2	0
BM171	2	2	2	2	2	2	2	2	0	2	2	2	2	1	2	2	2	2	2	2	0	2	2	2	2	2	2	2	2	0	2	2	2	2	2	2	2	2	2	2	2	2	2	2	2	2	2	2	0
IAC91	12	12	12	12	12	12	12	12	0	12	12	12	12	12	12	12	12	12	12	12	0	12	12	12	12	12	12	12	12	0	12	12	12	12	12	12	12	12	12	12	12	12	12	12	12	12	12	12	0
BM140	12	12	12	12	12	12	12	12	0	12	12	12	12	12	12	12	12	12	12	12	0	12	12	12	12	12	12	12	12	0	12	12	12	12	12	12	12	12	12	12	12	12	12	12	12	12	12	12	0
Pv04G103000	2	2	2	2	2	2	2	2	.	2	2	2	2	2	2	2	2	2	2	2	0	2	2	2	2	2	2	2	2	0	2	2	2	2	0	0	2	2	2	2	2	2	2	2	2	2	2	1	0
Pv04G085500	2	2	2	2	2	2	2	2	.	2	2	2	2	2	2	2	2	2	2	2	0	2	2	2	2	2	2	2	2	0	2	2	2	2	2	2	2	2	2	2	2	2	2	2	2	2	2	0	0
Pv04G088600	2	2	2	2	2	2	2	2	.	2	2	2	2	2	2	2	2	2	2	2	0	2	2	2	2	2	2	2	2	0	2	2	2	2	2	2	2	2	2	2	2	2	2	2	2	2	2	0	0
Pv04G099800	2	2	2	2	2	2	2	2	.	2	2	2	2	2	2	2	2	2	2	2	0	2	2	2	2	2	2	2	2	0	2	2	2	2	2	2	2	2	2	2	2	2	2	2	2	2	2	0	0
Pv04G091700	2	2	2	2	2	2	2	2	.	2	2	2	2	2	2	2	2	2	2	2	0	2	2	2	2	2	2	2	2	0	2	2	2	2	2	2	2	2	2	2	2	2	2	2	2	2	2	2	0
Pv04G92400	2	2	2	2	2	2	2	2	.	2	2	2	2	2	2	2	2	2	2	2	0	2	2	2	2	2	2	2	2	0	2	2	2	2	2	2	2	2	2	2	2	2	2	2	2	2	2	1	0
Chr04.10.80	2	2	2	2	2	2	2	2	.	2	2	2	2	2	2	2	2	2	2	2	0	2	2	2	2	2	2	2	2	0	2	2	2	2	2	2	2	2	2	2	2	2	2	2	2	2	2	1	0
Pv04G082300	2	2	2	2	2	2	2	2	.	2	2	2	2	2	2	2	2	2	2	2	0	2	2	2	2	2	2	2	2	2	2	2	2	2	2	2	2	2	2	2	2	2	2	2	2	2	2	1	0
Pv04G090994	2	2	2	2	2	2	2	2	.	2	2	2	2	2	2	2	2	2	2	2	0	2	2	2	2	2	2	2	2	2	2	2	2	2	2	2	2	2	2	2	2	2	2	2	2	2	2	1	0
Chr04.13.07	2	2	2	2	2	2	2	2	.	2	2	2	2	2	2	2	2	2	2	2	0	2	2	2	2	2	2	2	2	0	2	2	2	2	2	2	2	2	2	2	2	2	2	2	2	2	2	1	0
Chr04.14.42	2	2	2	2	2	2	2	2	.	2	2	2	2	2	2	2	2	2	2	2	0	2	2	2	2	2	2	2	2	0	2	2	2	2	2	2	2	2	2	2	2	2	2	2	2	2	2	1	0
Chr04.16.56	2	2	2	2	2	2	2	2	.	2	2	2	2	2	2	2	2	2	2	2	0	2	2	2	2	2	2	2	2	0	2	2	2	2	2	2	2	2	2	2	2	2	2	2	2	2	2	1	0
Chr04.12.98	2	2	2	2	2	2	2	2	.	2	2	2	2	2	2	2	2	2	2	2	0	2	2	2	2	2	2	2	2	0	2	2	2	2	2	2	2	2	2	2	2	2	2	2	2	2	2	1	0
Pv04G81800	2	2	2	2	2	2	2	2	.	2	2	2	2	2	2	2	2	2	2	2	0	2	2	2	2	2	2	2	2	0	2	2	2	2	2	2	2	2	2	2	2	2	2	2	2	2	2	1	0
Chr04.13.90	2	2	2	2	2	2	2	2	.	2	2	2	2	2	2	2	2	2	2	2	0	2	2	2	2	2	2	2	2	0	2	2	2	2	2	2	2	2	2	2	2	2	2	2	2	2	2	1	0
Pv04G084494	2	2	2	2	2	2	2	2	.	2	2	2	2	2	2	2	2	2	2	2	0	2	2	2	2	2	2	2	2	0	2	2	2	2	2	2	2	2	2	2	2	2	2	2	2	2	2	2	0
Chr04.13.58	2	2	2	2	2	2	2	2	.	2	2	2	2	2	2	2	2	2	2	2	0	2	2	2	2	2	2	2	2	0	2	2	2	2	2	2	2	2	2	2	2	2	2	2	2	2	2	1	0
Chr04.12.74	2	2	2	2	2	2	2	2	.	2	2	2	2	2	2	2	2	2	2	2	0	2	2	2	2	2	2	2	2	0	2	2	2	2	2	2	2	2	2	2	2	2	2	2	2	2	2	0	0
Chr04.12.95	2	2	2	2	2	2	2	2	.	2	2	2	2	2	2	2	2	2	2	2	0	2	2	2	2	2	2	2	2	0	2	2	2	2	2	2	2	2	2	2	2	2	2	2	2	2	2	2	0
Pv04G86500	2	2	2	2	2	2	2	2	.	2	2	2	2	2	2	2	2	2	2	2	0	2	2	2	2	2	2	2	2	0	2	2	2	2	2	2	2	2	2	2	2	2	2	2	2	2	2	1	0
Pv04G093300	2	2	2	2	2	2	2	2	.	2	2	2	2	2	2	2	2	2	2	2	0	2	2	2	2	2	2	2	2	2	2	2	2	2	2	2	2	2	2	2	2	2	2	2	2	2	2	1	0
Pv04G85100	2	2	2	2	2	2	2	2	.	2	2	2	2	2	2	2	2	2	2	2	2	2	2	2	2	2	2	2	2	2	2	2	2	2	2	2	2	2	2	2	2	2	2	2	2	2	2	1	0
Chr04.11.69	2	2	2	2	2	2	2	2	.	2	2	2	2	2	2	2	2	2	2	2	0	2	2	2	2	2	0	2	2	0	2	2	2	2	2	2	2	2	2	2	2	2	2	2	2	2	2	0	0
Pv04G94900	2	1	0	0	0	0	2	2	.	2	2	2	2	2	2	0	2	2	0	2	2	2	2	0	0	0	0	2	0	2	2	2	2	2	2	2	2	2	2	2	2	2	2	2	2	2	2	1	0
Chr04.10.01	2	2	2	2	2	2	2	2	.	2	2	2	2	2	2	2	2	2	2	2	0	2	2	2	2	2	2	2	2	0	2	2	2	2	2	2	2	2	2	2	2	2	2	2	2	2	2	1	0
Pv04G84400	2	2	2	2	2	2	2	2	.	2	2	2	2	2	2	0	2	2	0	2	2	2	2	2	2	2	0	0	0	0	2	2	2	2	2	2	2	2	2	2	2	2	2	2	2	2	2	1	0
PvLATE1a	0	2	2	2	2	2	2	2	.	0	2	2	2	2	2	2	2	2	2	2	0	2	2	2	2	2	2	2	2	0	2	2	0	2	0	2	2	2	2	2	2	2	2	0	2	2	2	2	0
Pv04G86300	2	2	2	2	2	2	2	2	.	2	2	2	2	2	2	2	2	0	2	2	0	2	0	2	2	.	2	2	2	0	2	0	2	2	.	2	2	2	2	0	.	2	2	2	2	2	2	0	0
Chr04.14.68	0	1	2	2	2	2	2	2	.	2	1	2	2	2	2	2	2	2	2	2	0	0	2	2	2	2	2	2	2	0	2	2	2	2	2	2	2	2	2	2	2	2	2	2	2	2	2	0	0
IAC96	12	12	0	0	0	0	0	12	12	0	0	0	0	0	0	0	12	0	12	0	0	0	0	12	0	0	0	0	0	0	0	0	12	12	12	0	0	12	0	12	12	0	12	0	0	0	0	12	12
PvCh05-2.9	2	2	2	0	2	0	0	2	2	0	2	0	0	0	0	0	2	0	2	2	1	0	2	2	0	0	2	0	2	0	0	0	1	2	2	0	2	2	0	2	2	2	2	0	0	0	0	2	2
PvCh05-3.1	2	2	2	1	2	0	0	2	2	0	2	0	0	0	0	0	2	0	2	0	0	0	2	2	0	0	2	0	2	0	0	0	2	2	2	0	2	2	0	2	2	2	2	0	0	0	0	2	2
IAC286	2	2	2	0	0	0	0	0	0	2	2	0	0	0	0	2	2	1	2	2	1	0	2	2	0	0	2	0	2	2	0	0	0	2	0	0	2	0	0	0	2	0	2	2	2	2	2	2	2
PvCh05-30.4	2	2	2	0	0	0	0	0	0	2	2	0	0	1	0	2	0	.	2	2	2	0	2	2	0	0	2	0	2	2	0	0	0	0	0	0	2	0	0	0	2	0	2	2	2	2	2	2	2
BMc321	2	2	2	0	0	0	0	0	0	2	2	0	0	1	0	2	0	0	2	2	1	0	2	2	0	0	2	0	2	2	0	0	0	2	0	0	2	0	0	0	2	0	2	2	2	2	2	2	2
E42M60-122	12	12	12	0	0	0	0	0	0	12	12	0	0	12	0	12	0	0	12	12	12	0	12	12	0	0	12	0	12	12	0	0	0	0	0	0	12	0	0	0	12	0	12	12	12	12	12	12	12
E32M60-100	2	2	2	10	10	10	10	10	10	2	2	10	10	10	10	2	10	10	2	2	2	10	2	2	10	10	2	10	2	2	10	2	10	10	10	10	2	10	10	10	2	10	2	2	2	2	2	2	2
BM138	2	2	2	0	0	0	0	0	0	2	2	0	0	0	0	2	0	0	2	2	1	0	2	2	0	0	2	0	2	2	0	0	0	0	0	0	2	0	0	0	2	0	2	2	2	2	2	2	2
E32M60-263	2	2	2	10	10	10	10	10	10	2	2	10	10	10	10	2	10	10	2	10	10	10	2	2	10	10	2	10	2	10	10	10	10	10	10	10	2	10	10	10	2	10	2	2	2	10	2	2	2
PvCh05-33.9	2	2	2	0	0	0	0	0	0	2	2	0	0	0	0	2	0	0	2	2	1	0	2	0	0	.	2	0	2	2	0	0	0	0	0	0	2	0	0	0	2	0	0	2	2	2	2	2	0
PvCh05-35.9	12	12	12	0	0	0	0	0	0	12	12	0	0	0	0	12	0	.	12	12	12	0	12	0	0	0	12	0	12	12	0	0	0	0	0	0	12	0	0	0	12	12	0	12	12	12	12	12	12
BM175	2	2	2	0	0	0	0	0	0	2	2	0	0	1	0	2	0	0	0	0	1	0	2	0	2	0	2	0	2	2	0	0	0	0	0	0	2	0	0	1	2	2	0	2	2	2	2	2	2
PvSHP1	2	2	2	2	2	2	2	0	0	0	1	2	2	2	2	2	0	2	0	0	2	2	2	2	2	2	2	2	2	0	2	2	2	2	2	2	2	2	2	2	2	2	0	2	2	0	0	2	0
E36M37-550	12	12	.	12	12	12	12	0	12	12	0	12	12	12	12	12	0	.	0	0	12	12	12	12	12	0	12	12	12	0	12	12	12	12	0	12	12	12	12	12	12	12	0	12	0	0	0	12	0
E31M61-465	2	2	2	2	2	2	2	10	10	2	10	2	2	10	2	10	10	2	10	10	2	10	2	2	2	10	2	2	2	10	2	2	2	2	2	2	2	2	2	2	10	2	10	2	2	10	10	2	10
E31M50-101	12	12	12	12	12	12	12	0	12	12	0	12	12	12	12	12	0	12	0	0	12	12	12	12	12	0	12	12	12	0	12	12	12	12	12	12	12	12	12	12	12	12	0	12	12	0	0	12	0
E45M38-113	2	2	2	2	2	2	2	10	10	2	10	2	2	2	2	2	10	2	10	10	2	2	2	2	2	10	2	2	2	2	2	10	10	2	10	2	2	2	2	2	2	2	10	2	2	2	10	2	10
E45M38-112	12	12	12	12	12	12	12	0	12	12	0	12	12	12	12	12	0	12	0	12	12	12	12	12	12	0	12	12	12	12	12	12	0	12	0	12	12	12	12	12	12	12	0	12	12	12	0	12	0
E36M34-250	2	2	2	2	2	2	2	10	2	2	10	2	2	10	2	10	10	2	10	10	10	10	2	10	2	10	2	2	2	2	2	2	2	2	2	2	2	2	2	2	2	2	10	2	2	2	10	10	10
PvCh06-19.5	12	12	12	12	12	12	12	0	12	12	0	12	12	12	12	0	0	12	0	0	12	12	12	12	12	0	12	12	12	0	12	12	12	12	12	12	12	12	12	12	12	12	0	12	12	12	0	0	0
E45M50-50	2	2	2	2	2	2	2	10	10	2	10	2	2	2	2	10	10	10	10	10	10	2	2	2	2	10	2	2	2	10	2	2	2	2	2	2	2	2	2	2	2	2	10	2	2	2	10	10	10
E40M60-164	12	12	12	12	12	12	12	0	12	12	0	12	12	12	12	12	0	12	0	0	.	12	12	12	12	0	12	12	12	12	12	12	12	12	12	12	12	12	12	12	12	12	0	12	12	12	0	0	0
E40M60-166	2	2	2	2	2	2	2	10	10	2	10	2	2	2	2	2	10	2	10	10	.	2	2	2	2	10	2	2	2	2	2	2	2	2	2	2	2	2	2	2	2	2	10	2	2	2	10	10	10
E45M50-167	12	12	12	12	12	12	12	0	12	12	0	12	12	12	12	12	0	12	0	0	12	12	12	12	12	0	12	12	12	12	12	12	0	12	0	0	12	12	12	12	12	12	0	12	12	12	0	0	0
E40M60-91	2	2	2	2	2	2	2	10	10	2	10	2	2	2	2	2	10	2	10	10	2	2	2	2	2	10	2	2	2	2	2	2	2	2	2	2	2	2	2	2	2	2	10	2	2	2	10	10	10
BMc238	2	2	2	2	2	0	2	0	1	0	0	2	2	2	2	0	0	2	0	0	1	2	2	2	2	0	2	2	2	.	2	2	2	2	2	2	2	2	2	2	2	2	0	2	2	2	0	0	0
IAC287	2	2	2	2	2	0	2	0	2	0	0	2	2	1	2	0	0	2	0	0	0	0	2	2	0	0	2	2	2	2	2	2	2	2	2	2	0	2	2	2	2	2	0	2	2	2	0	0	0
PvAG1b	2	2	2	2	0	0	0	2	.	0	0	0	0	0	0	0	0	2	0	0	2	2	2	2	2	0	2	0	2	2	2	2	2	2	2	2	0	2	2	0	2	2	2	2	2	2	2	0	0
PvAG1a	2	2	2	2	1	0	0	2	.	0	0	0	0	0	0	0	0	2	0	0	2	2	2	2	2	1	2	0	2	2	2	2	2	2	2	2	0	2	2	0	2	2	2	2	2	2	2	0	0
GH	2	10	2	2	2	2	10	10	10	10	2	10	10	10	10	10	10	10	10	10	10	10	10	10	10	10	2	10	10	10	10	10	10	10	10	10	10	10	10	10	2	10	10	10	10	10	10	10	2
E31M31-187	2	2	2	2	2	2	2	2	2	10	2	10	10	10	10	10	2	10	2	2	10	10	10	10	10	10	2	10	10	10	2	2	2	10	10	2	10	10	2	10	2	10	2	2	2	2	10	10	10
E45M61-218	2	2	2	10	10	2	10	2	2	2	10	10	10	10	10	2	2	2	2	2	2	2	2	2	2	2	2	10	10	10	10	10	10	10	10	10	10	10	10	10	2	10	10	10	10	10	2	10	10
BM185	2	2	2	2	.	2	2	2	2	2	2	0	0	0	0	2	2	2	2	2	2	2	0	0	2	2	2	0	0	0	2	1	0	2	2	2	2	0	2	2	2	2	1	0	0	0	2	2	2
P	10	2	2	2	2	2	2	2	2	2	10	10	10	10	10	2	2	2	2	2	2	2	2	2	2	2	2	10	10	2	2	2	10	10	10	10	10	10	2	2	2	2	2	10	10	10	2	2	2
BMc294	0	2	2	2	2	2	2	2	2	2	2	2	2	0	2	2	2	2	2	2	2	2	0	0	2	2	2	2	0	2	2	1	0	0	0	0	0	0	2	0	2	0	0	0	0	0	2	2	2
BMc248	0	2	1	2	2	.	2	2	2	2	2	2	2	0	2	2	2	2	2	2	2	2	0	0	2	2	2	2	1	2	2	1	0	0	0	0	0	0	2	0	2	0	0	0	0	0	2	2	2
E31M31-119	10	2	10	2	2	2	2	2	2	2	2	2	2	2	2	2	2	2	2	2	2	2	10	10	2	2	2	2	10	2	2	10	10	10	10	10	10	10	2	10	2	2	10	2	2	10	2	2	2
E31M31-121	0	12	12	12	12	12	12	12	12	12	12	12	12	12	12	12	12	12	12	12	12	12	0	0	12	12	12	12	0	12	12	12	0	0	0	0	0	0	12	0	12	12	0	12	12	12	12	12	12
BMc338	0	0	0	0	.	2	2	2	2	2	0	2	2	2	2	0	2	2	2	2	2	2	0	0	0	2	2	2	0	2	2	1	0	0	0	0	0	0	2	0	2	2	0	2	2	2	2	0	2
BMc137	0	0	0	0	2	2	2	2	2	2	0	2	2	2	2	0	2	2	2	2	2	2	0	0	0	2	2	2	0	2	2	1	0	0	0	0	0	0	2	0	2	2	0	2	2	2	2	0	2
E31M61-110	10	2	2	10	2	2	2	10	10	2	10	2	2	2	2	10	10	2	10	10	10	10	2	10	10	10	10	2	10	10	2	10	10	10	10	10	10	10	2	10	2	10	10	10	10	10	10	10	10
BMc216	0	2	2	0	0	0	0	0	0	2	0	2	2	1	2	0	0	2	2	2	2	2	0	0	0	0	0	2	0	0	2	1	0	0	0	0	0	0	2	0	2	0	0	2	2	2	0	0	0
E43M38-309	0	12	12	0	0	0	0	0	0	12	0	12	12	12	12	0	0	0	12	12	12	12	0	0	0	0	0	12	0	0	12	12	0	0	0	0	0	0	12	0	12	0	0	12	12	12	0	0	0
E31M51-177	2	10	10	2	2	2	2	2	2	2	2	10	10	2	10	2	10	2	2	2	10	10	2	10	10	2	10	10	10	10	2	10	10	2	2	10	2	10	2	10	10	10	10	2	2	2	2	10	2
BMd25	2	0	0	2	2	2	2	2	0	2	2	0	0	1	0	0	0	0	0	0	0	0	2	2	0	2	0	1	0	0	2	2	2	2	2	0	2	0	2	2	2	2	2	2	2	2	2	0	2
PvFTb3	2	0	0	2	2	2	2	2	.	0	0	0	0	0	0	0	0	0	0	0	0	0	0	0	0	2	0	0	0	0	2	2	2	2	2	0	2	2	2	0	0	0	0	2	2	2	2	0	2
E32M51-141	12	12	12	12	12	12	12	12	12	12	0	0	0	0	0	12	0	0	0	0	0	12	12	12	0	12	0	0	0	12	12	12	0	0	0	12	0	0	12	12	12	12	12	0	12	0	12	12	12
BMc121	2	2	2	2	2	2	2	2	2	2	.	0	0	1	0	2	0	0	0	0	1	2	2	2	0	2	0	0	0	2	2	1	0	0	0	2	0	0	2	2	2	2	2	0	0	0	2	1	2
BM165	2	2	2	.	2	2	2	0	0	2	2	1	2	0	2	2	1	0	0	0	0	2	2	2	0	2	0	1	0	2	2	1	0	0	0	.	0	0	2	2	2	2	2	.	0	0	2	2	2
BMc147	2	2	2	2	0	0	2	0	0	2	2	0	2	0	2	2	1	0	0	0	2	2	2	0	0	2	0	0	0	2	2	1	0	0	0	2	0	0	2	2	2	2	2	0	0	0	2	2	2
BM211	2	2	2	2	0	0	2	1	0	2	2	1	2	0	2	2	1	0	0	0	1	2	2	0	0	2	0	1	0	2	2	1	0	0	0	2	0	0	2	2	2	2	2	0	0	0	2	2	2
PVEST194	12	12	12	12	0	0	12	12	0	12	12	12	12	0	12	12	12	0	0	0	12	12	12	0	0	12	0	12	0	12	12	12	0	0	0	12	0	0	12	12	12	12	12	0	0	0	12	12	12
IAC027	2	2	2	2	0	0	2	1	0	2	2	1	2	0	2	2	1	0	0	0	2	2	1	0	0	2	0	0	0	2	2	1	0	0	0	0	0	0	2	2	2	2	2	0	2	1	2	2	2
E32M51-160	2	2	2	2	10	10	2	10	10	2	2	10	2	10	2	2	10	10	10	10	2	2	10	10	10	2	10	10	10	2	2	10	10	10	10	10	10	10	2	2	2	2	2	10	2	10	2	2	2
BM238	2	2	2	2	0	0	2	1	0	2	2	0	2	0	2	2	1	0	0	0	2	2	1	0	0	2	0	0	0	2	2	1	0	0	0	.	0	0	2	2	2	2	2	0	0	0	2	2	2
E31M50-355	12	12	12	12	0	0	12	12	0	12	12	0	12	0	12	12	12	0	0	0	12	0	12	0	0	12	0	0	0	12	12	12	0	0	0	0	0	0	12	12	12	12	12	0	0	0	12	12	12
E36M38-142	12	12	12	12	0	0	12	12	0	12	12	0	12	0	12	12	12	0	0	0	12	12	12	0	0	12	0	0	0	12	12	12	0	0	0	0	0	0	12	12	12	12	12	0	12	12	12	12	12
E31M50-580	12	12	0	12	0	0	12	0	0	12	12	0	12	0	12	12	12	0	0	0	.	0	12	0	0	12	0	0	0	12	12	12	0	0	0	0	0	0	12	12	12	12	0	0	12	0	12	12	12
BMc330	2	2	2	2	0	0	2	1	0	2	2	0	2	0	2	2	2	0	0	0	2	2	0	2	0	2	0	0	0	0	2	1	0	0	0	0	0	0	2	2	2	2	2	0	2	1	2	2	2
PvCh08-45.7	2	2	1	2	0	0	2	0	0	1	2	1	1	0	2	2	2	0	0	0	.	2	0	2	.	2	0	0	0	0	2	.	0	0	0	0	0	0	2	2	2	2	2	0	0	0	2	2	2
BMc316	2	2	2	2	2	2	2	0	0	2	2	0	2	0	2	2	2	0	0	0	2	2	0	2	0	2	0	0	0	0	.	1	0	0	0	0	0	0	2	2	2	2	2	0	2	1	2	2	2
E45M50-69	12	12	12	12	12	12	12	0	0	12	12	0	12	0	12	12	12	0	0	0	12	12	0	12	0	12	0	0	0	0	12	12	0	0	0	0	0	0	12	12	12	12	12	0	12	12	12	12	12
PvCh08-50.1	12	12	12	12	12	12	12	12	0	12	12	0	12	0	12	12	12	0	0	0	12	12	0	12	0	12	0	12	0	.	12	12	12	0	0	0	0	0	12	12	12	12	12	0	12	12	12	12	12
IAC22	2	2	2	2	2	2	2	2	10	2	2	10	2	10	2	2	2	10	10	10	2	2	10	10	10	2	2	10	2	10	2	2	2	10	2	10	2	10	2	2	2	2	2	10	2	10	2	2	2
E45M61-192	2	2	2	2	2	2	2	2	10	10	2	10	2	10	2	2	2	10	2	2	2	2	10	10	10	2	2	10	2	10	2	2	2	2	2	10	2	10	2	2	2	2	2	10	2	2	2	2	2
E40M31-152	2	10	10	10	10	2	10	2	2	2	10	10	10	10	10	2	2	2	10	2	2	2	10	10	10	2	10	10	2	2	2	2	2	2	2	2	2	2	2	2	10	2	10	10	2	2	2	10	2
E40M31-151	12	0	0	12	0	0	0	12	12	12	0	0	0	0	0	12	12	0	0	0	0	0	0	0	0	12	0	0	0	0	12	12	12	12	12	12	12	12	12	12	0	12	0	0	12	12	12	0	12
BM154	2	0	0	.	0	0	0	2	2	2	0	0	.	1	0	2	2	0	0	0	0	0	0	0	0	2	0	0	1	0	2	1	2	2	2	.	2	2	2	2	0	2	0	.	2	2	2	0	2
PvFDc	12	0	0	12	0	0	0	12	.	0	12	0	0	0	0	12	12	0	0	0	0	0	0	0	0	12	12	12	12	0	12	0	12	12	12	0	12	12	12	12	0	0	0	0	12	12	12	0	12
PvM128	2	2	2	2	0	0	2	0	0	2	2	1	2	0	2	2	1	0	0	0	2	2	0	0	0	2	0	0	0	2	2	1	0	0	0	0	0	0	2	2	2	2	2	0	2	1	2	0	2
IAC062	0	0	0	0	0	0	0	2	2	2	2	0	2	1	0	2	2	0	2	2	0	0	0	0	0	.	2	.	2	0	2	2	2	2	2	2	2	2	2	0	0	2	0	2	1	2	2	0	2
BMc184	0	0	0	0	0	0	0	2	2	2	.	0	0	1	0	2	2	0	2	2	0	0	0	0	0	0	2	0	2	0	2	1	2	2	2	2	2	2	2	0	0	2	0	2	2	2	2	0	2
PvCOL3	0	0	0	1	0	0	0	0	.	1	0	0	0	1	0	2	2	0	0	0	0	0	0	0	0	0	2	1	2	0	2	0	2	2	2	2	2	2	2	0	0	2	0	2	2	2	2	0	2
PvCh09-15.1	2	0	0	0	0	0	0	0	0	2	2	0	0	1	0	0	0	0	2	0	0	0	0	0	0	0	2	0	2	0	2	2	2	2	2	2	2	2	2	0	0	2	2	2	2	2	2	0	2
PV-at007	2	0	0	0	0	0	0	0	0	2	2	0	0	1	0	0	0	0	0	0	0	0	0	0	0	0	2	0	2	0	0	0	0	0	0	0	0	0	0	0	1	0	2	2	2	2	2	0	2
BM202	2	0	0	1	0	0	0	0	0	2	2	0	0	0	0	0	0	0	0	2	0	0	0	0	0	1	2	0	2	0	0	0	0	0	0	0	0	0	0	2	2	2	2	2	2	2	2	2	2
Pv09G187100	2	0	0	1	0	0	0	0	0	2	2	0	0	0	0	0	1	0	2	2	0	0	0	0	0	1	2	1	2	0	0	0	0	0	0	0	0	0	0	2	2	0	2	2	2	2	2	2	2
Pv09G204500	2	0	0	0	2	2	2	0	0	2	0	0	0	0	0	0	0	0	2	2	0	0	0	0	0	1	2	0	2	0	0	0	0	0	0	0	0	0	0	2	2	0	2	2	2	2	0	0	2
Pv09G204700	2	0	0	0	2	2	2	0	0	2	0	0	0	0	0	0	0	0	2	2	0	0	0	0	0	1	2	0	2	0	0	0	0	0	0	0	0	0	0	2	2	0	2	2	2	2	0	0	2
Pv09G213200	2	0	0	0	1	1	0	0	0	2	0	0	0	0	0	2	1	0	2	0	0	0	0	0	0	2	2	1	2	0	0	0	0	0	0	0	0	0	0	2	2	0	2	0	0	0	0	0	2
Pv09G204900	2	0	0	1	1	2	2	0	0	2	0	0	0	0	0	0	1	0	2	2	0	0	0	0	0	1	2	1	2	0	0	0	0	0	0	0	0	0	0	2	2	0	2	2	2	2	0	1	2
PvFUL1	2	0	0	1	2	2	2	0	0	2	0	0	0	0	0	0	1	0	2	2	0	0	0	0	0	1	2	1	2	0	0	0	0	0	0	0	0	0	0	2	2	0	2	2	2	2	0	1	2
Pv09G203300	2	0	0	1	2	2	2	0	0	2	0	0	0	0	0	0	1	0	2	2	0	0	0	0	0	1	2	1	2	0	1	0	0	0	0	0	0	0	0	2	2	0	2	2	2	2	0	1	0
PvCh09-30.8	12	0	0	12	12	12	12	0	0	12	12	0	0	0	0	0	0	0	12	12	0	0	0	0	0	12	12	.	12	0	0	0	0	0	0	0	0	0	0	12	12	12	12	12	12	12	0	0	12
E40M50-47	12	0	0	12	12	12	0	0	0	12	12	0	0	0	0	12	0	0	12	12	0	0	0	0	0	12	12	0	12	0	0	0	0	0	0	0	0	0	0	12	12	12	12	0	0	0	0	12	12
E40M50-51	2	10	10	10	2	2	10	10	10	2	2	10	10	10	10	10	10	10	2	2	10	10	10	10	10	2	2	10	2	10	10	10	10	10	10	10	10	10	10	2	2	2	2	10	10	10	10	10	2
E31M51-59	2	10	10	2	2	2	2	10	10	2	2	10	10	10	10	2	10	10	2	2	10	10	10	10	10	2	2	10	2	10	10	10	10	10	10	10	10	10	10	2	2	2	2	10	10	10	10	10	2
Pv09G227300	2	0	0	2	2	2	0	0	0	2	0	0	0	0	0	2	1	0	2	2	0	0	0	0	0	2	2	1	2	0	0	0	0	0	0	0	0	0	0	2	2	0	2	0	0	0	2	0	2
BMb563	12	0	0	0	12	12	0	0	0	0	12	0	0	0	0	0	12	0	12	12	12	12	0	0	12	12	12	0	12	0	0	0	0	0	0	0	0	0	0	12	12	12	12	12	0	0	12	0	12
Pv09G239400	2	0	0	2	2	2	0	0	0	2	0	0	0	0	0	0	2	0	2	2	2	2	2	2	2	2	2	2	2	0	0	0	0	0	0	0	0	0	0	2	2	2	2	0	0	0	2	2	2
BMc318	0	0	0	0	12	12	0	0	12	12	12	0	0	0	0	0	12	0	12	12	12	12	12	0	12	12	0	0	0	0	0	0	0	0	0	0	0	0	0	0	0	0	0	0	0	0	12	0	12
BMc269	0	2	1	0	2	2	0	2	1	2	2	0	0	0	0	0	2	0	2	1	2	2	2	2	2	2	0	0	0	0	0	0	0	0	0	0	0	0	0	0	0	0	0	0	0	0	2	0	2
E31M31-173	2	2	2	2	10	10	10	10	10	2	2	10	10	10	10	2	10	10	2	10	10	10	2	2	10	10	2	10	2	10	10	2	2	2	2	2	2	2	2	10	10	10	10	10	2	2	10	10	10
E31M50-168	2	2	2	2	10	10	10	10	2	2	10	10	10	10	10	2	10	10	2	2	10	10	2	2	10	10	2	10	2	2	10	2	2	2	2	2	2	2	2	10	10	10	10	10	2	2	10	10	2
E36M34-228	2	2	2	2	10	10	10	10	2	2	10	10	10	10	10	2	10	10	2	2	2	2	2	2	10	10	2	10	2	10	10	2	2	2	2	2	2	2	2	10	10	10	2	10	2	2	10	10	2
PvCh10-4.5	0	0	0	0	0	0	0	0	0	0	0	0	0	0	0	0	0	0	2	2	2	2	2	2	2	1	0	2	0	2	0	2	2	2	2	2	2	2	0	0	0	0	0	0	2	2	2	0	2
E31M51-284	0	0	0	0	0	0	0	0	0	0	12	0	0	0	0	0	0	0	12	12	12	12	12	12	12	0	0	12	0	12	0	12	12	0	12	12	12	12	0	0	0	0	0	0	12	12	12	0	12
E31M51-166	10	10	10	10	2	10	10	10	10	10	2	10	10	10	10	10	10	10	2	10	2	10	2	2	2	10	10	10	10	2	10	10	2	2	2	2	2	2	10	10	10	10	10	2	2	2	2	10	10
E36M31-344	10	10	10	10	10	10	10	10	10	10	10	10	10	10	10	10	10	10	2	2	2	10	2	2	2	10	10	10	.	2	10	2	2	2	2	2	2	2	10	10	10	10	10	10	2	2	2	10	2
PvM127	0	0	0	0	0	0	0	0	0	0	2	0	0	0	0	0	0	0	2	2	2	2	2	2	2	0	0	1	1	2	0	1	2	2	2	2	2	2	0	0	0	0	0	0	2	2	2	0	1
PVEST099	0	.	0	0	0	0	0	0	0	0	2	0	0	0	0	0	0	0	2	2	2	2	2	2	2	0	0	1	0	2	0	1	2	2	2	2	2	2	0	0	0	0	0	0	2	2	2	0	1
IAC061	10	10	10	10	10	10	10	10	10	10	2	10	10	10	10	10	10	10	2	2	2	2	2	2	2	10	10	10	10	2	10	10	2	2	2	2	2	2	10	10	10	10	10	10	2	2	2	10	2
BMc234	0	0	0	0	0	0	0	2	1	0	2	0	0	0	0	0	0	0	2	2	2	2	2	2	2	0	0	0	0	.	.	1	2	2	2	2	2	2	0	0	0	0	0	0	2	2	2	0	1
E45M38-194	0	0	0	0	0	0	0	12	12	0	0	0	0	0	0	0	0	0	12	12	12	0	12	12	12	0	0	0	0	12	0	12	12	12	12	12	12	12	0	0	0	0	0	0	12	12	12	0	12
BMb414	10	10	10	10	10	10	10	2	10	10	10	10	10	10	10	10	10	10	2	2	2	2	2	2	2	10	10	10	10	.	10	10	2	2	2	2	2	2	10	10	10	10	10	10	2	2	2	10	10
PvCh10-21.1	0	0	0	0	0	0	0	2	1	0	0	0	0	0	0	0	0	0	2	2	2	2	2	2	2	0	0	0	0	2	0	1	2	2	2	2	2	2	0	0	0	0	0	0	2	2	2	0	0
E36M37-20	10	10	10	10	10	10	10	2	2	10	10	10	10	10	10	10	10	10	2	10	2	10	2	2	2	10	10	10	10	2	10	10	2	2	2	2	2	2	10	10	10	10	10	10	2	2	2	10	10
BMc159	2	0	0	1	0	0	0	2	2	0	0	0	0	0	0	0	0	0	2	2	2	2	2	2	2	0	0	0	0	2	0	2	2	2	2	2	2	2	0	0	0	0	0	0	2	2	2	0	1
SNP-2521	0	0	0	0	0	2	0	2	1	0	2	0	0	0	0	0	0	0	2	2	2	2	2	2	2	0	0	0	1	.	0	1	2	2	0	2	2	2	0	0	0	0	0	0	0	2	2	0	1
PvCh10-36.5	2	0	0	1	0	0	.	2	2	0	0	0	0	0	0	2	0	0	2	2	2	2	2	0	2	0	0	0	0	0	0	0	0	2	2	2	2	.	0	0	0	0	0	0	2	2	2	0	0
PvCh11-0.3	.	.	2	0	0	0	0	2	2	2	2	0	0	0	0	0	2	.	2	.	.	2	0	0	2	2	0	0	0	0	0	0	0	0	0	0	0	0	0	2	2	2	2	.	.	0	2	0	0
PvCh11-1.5	2	2	2	2	0	0	0	2	2	2	2	0	0	1	0	0	0	.	2	2	2	2	0	0	2	2	0	0	0	0	0	2	2	2	0	0	0	2	0	2	2	2	2	0	0	0	0	0	0
BMc174	2	2	2	2	0	0	0	2	2	2	2	0	0	0	0	0	0	0	2	2	2	2	0	0	2	2	0	0	0	0	0	1	2	2	0	0	0	2	0	2	2	2	2	0	0	0	0	0	0
Leg241	2	2	2	1	0	.	0	2	2	2	2	0	0	0	0	0	2	0	2	2	1	2	0	0	2	2	0	0	0	0	0	1	0	2	0	0	1	2	0	2	2	2	2	0	0	0	0	0	0
PvM152	2	2	2	2	0	0	0	2	2	2	2	0	0	0	0	0	2	1	2	2	2	2	0	0	2	2	0	0	0	0	.	1	0	2	0	0	2	2	0	2	2	2	2	1	0	0	0	1	1
BMc204	2	2	2	2	2	2	0	2	0	2	.	0	0	0	0	0	2	0	2	2	2	2	0	0	2	2	0	0	0	0	0	0	0	0	0	0	2	0	0	2	2	2	2	0	0	0	0	0	0
PvCh11-2.7	0	2	2	0	2	2	2	2	0	2	2	0	0	1	0	0	2	0	2	2	2	2	0	0	2	2	0	0	0	0	0	0	0	0	0	0	2	0	0	2	2	2	2	0	0	0	0	0	0
E31M50-62	10	2	2	10	2	2	10	2	10	2	2	10	10	10	10	10	2	10	2	2	2	2	10	10	2	2	10	10	10	10	10	10	10	10	10	10	2	10	10	2	2	2	2	10	10	10	10	10	10
PvCh11-2.6	0	2	2	0	2	2	2	2	0	2	2	0	0	0	0	0	2	0	2	2	2	2	2	0	2	2	0	0	0	0	2	0	0	0	0	0	2	0	0	2	2	2	2	0	0	0	0	0	0
BMd033	0	2	2	0	2	2	2	2	0	2	2	0	0	0	0	2	0	0	2	2	2	2	0	0	2	2	0	0	1	.	0	1	2	2	2	2	2	2	0	2	2	2	2	0	0	0	0	0	0
E45M50-328	10	2	2	10	2	2	2	2	10	2	10	10	2	10	10	2	10	2	10	10	2	10	10	10	2	2	10	10	2	2	10	2	2	2	2	2	2	2	10	2	10	10	2	10	10	10	10	10	10
PvCh11-4.2	0	2	2	0	2	2	2	2	0	2	0	0	0	0	0	2	0	0	0	0	2	2	0	0	2	2	0	0	0	2	0	1	2	2	2	2	2	2	0	2	0	0	0	0	0	0	0	0	0
E45M50-351	0	0	0	0	12	12	12	12	0	0	0	0	0	0	0	0	0	0	0	0	0	12	0	0	12	12	0	0	0	12	0	12	12	12	0	12	12	12	0	12	0	0	0	0	0	0	0	0	0
PvCh11-9.1	0	1	1	0	1	1	2	0	0	0	0	0	0	0	0	.	0	.	0	.	.	0	0	0	0	0	0	0	0	0	0	1	.	2	2	1	1	1	0	.	0	0	0	0	.	.	0	0	0
E42M60-253	0	12	12	0	0	12	12	0	0	0	0	0	0	0	0	12	0	0	0	12	0	12	0	0	0	0	0	0	0	0	0	12	12	12	12	12	0	12	0	0	0	0	0	0	0	0	0	0	0
SNP-3439	0	2	2	0	.	.	2	0	0	0	0	0	0	0	0	2	0	0	0	0	0	0	0	0	0	0	0	0	0	0	0	1	2	2	2	2	2	2	0	0	0	0	0	0	0	0	0	0	0
E36M34-241	0	12	12	0	12	12	12	0	0	0	0	0	0	0	0	12	0	0	0	0	0	0	0	0	0	0	0	0	0	0	0	12	12	12	12	12	12	12	0	0	0	0	0	0	0	0	0	0	0
BMc322	0	2	2	0	2	2	2	0	0	0	0	0	0	0	0	2	0	0	0	0	0	0	0	0	0	0	0	0	0	0	0	1	2	2	2	2	2	2	0	0	0	0	0	0	0	0	0	0	0
E40M60-254	0	12	12	12	12	12	12	0	0	0	0	0	0	0	0	12	0	0	0	0	0	0	0	0	0	0	0	0	0	0	0	12	12	12	0	12	12	12	0	0	0	0	0	0	0	0	0	0	0
E45M61-387	0	12	12	12	12	12	12	0	0	0	0	0	0	0	0	12	0	0	0	0	.	0	0	0	0	0	0	0	0	0	0	12	12	12	12	12	12	12	0	0	0	0	0	0	0	0	0	0	0
PvM98	0	2	2	1	2	2	2	0	1	0	0	0	0	0	0	2	0	0	0	0	1	0	0	0	0	0	0	0	0	0	0	1	2	2	2	2	2	2	0	0	0	0	0	0	0	0	0	0	0
PvCh11-41.1	0	2	2	1	2	2	2	0	2	2	0	0	0	0	0	2	0	.	0	0	1	0	0	0	0	0	0	2	0	0	0	1	2	2	2	2	2	2	0	0	0	0	0	0	0	0	0	0	0
E32M51-124	10	2	2	10	2	2	2	10	2	10	10	10	10	10	10	10	10	10	10	10	10	10	10	10	10	10	10	10	10	2	10	10	2	2	2	2	2	2	10	10	10	10	10	10	10	10	10	10	10
E43M38-409	10	10	10	10	2	2	2	10	2	10	10	10	10	.	10	10	10	.	10	10	10	10	10	10	10	2	10	10	10	2	10	10	2	2	2	2	2	2	10	10	10	10	10	10	10	10	2	10	10
PV-ag001	0	0	0	.	2	2	2	0	0	0	0	0	0	0	0	0	0	2	0	0	0	0	0	0	2	2	0	0	0	0	0	1	2	2	2	.	2	2	0	0	0	0	0	.	0	0	2	0	0
PvCh11_49.1	0	0	0	1	2	.	2	0	0	0	0	0	0	0	0	0	0	2	0	0	.	0	0	0	2	2	0	0	0	0	0	2	2	2	2	2	2	2	0	0	0	0	0	0	0	0	2	0	0
E43M38-425	0	0	0	12	12	12	12	0	12	0	0	0	0	.	0	0	0	12	0	.	0	0	0	0	0	12	0	0	0	12	0	12	12	12	12	12	12	12	0	0	0	0	0	0	0	0	12	0	0
E45M50-135	0	0	0	0	12	12	12	0	12	0	12	0	0	0	0	0	0	12	0	0	0	0	0	0	0	12	0	0	0	12	0	12	12	12	12	12	12	12	0	0	0	0	0	0	0	0	12	0	0
DTFSD1	57.5	62	55	58.67	56.33	61	57.5	57	.	78	.	61	64.5	62.5	65.5	59	61.33	.	60.75	55	57	58.75	62.5	65.67	64.5	59	63.5	69	59	54	64	65	58.33	62.67	66	63	61.25	63.33	68	51	56.67	.	57	57.33	55.67	58	66.5	54	.
DTFSD2	51	54	51	44	48	57	48	51	57	51	54	51	57	57	57	51	57	57	48	51	.	55	57	51	58	54	51	55	51	51	56	55	51	51	51	51	51	54	51	44	51	44	44	51	51	51	54	54	51
DTFSD3	57.5	62	55	58.67	56.33	61	57.5	57	.	78	.	61	64.5	62.5	65.5	59	61.33	.	60.75	55	57	58.75	62.5	65.67	64.5	59	63.5	69	59	54	64	65	58.33	62.67	66	63	61.25	63.33	68	51	56.67	.	57	57.33	55.67	58	66.5	54	.
DTFSD4	45.33	55	48.33	43.33	50	51	47	59.33	.	50.33	47	54.67	54.67	58.67	56	53.33	48.67	50	48.67	48	54.33	56.67	56.33	58.33	59	48.33	46.33	58.33	52.5	53.67	59.33	56.67	55.33	50	56	51	51	54.67	52	47	43.67	59.33	44	50.67	50.33	47	56.33	54.67	47.33
DTFSD5	51	52	50	52	48	50.5	48	51	.	51	50	52	59	53.5	49.5	51.5	50.5	60.5	53	56	49	50	51	57	51.5	52	49	59	53	50	54	49.5	50.5	49	50	49.5	52	50	48	50	53	52	52	49.5	59	49.5	53	50.5	50
DTFSD6	51.67	72.33	64.33	57.67	51	75	65	57.33	71.67	55	73	77	77	61	72.33	50	55.67	74	.	57	71.67	57	75	70.67	74	52	49.67	72.33	52	55	57	62	73.67	52.33	66	61	55	57	56.33	51.33	49	49.33	50	53.33	55	56.33	66.33	47	50
DTFLD1	.	59	47	.	61	56	.	56	59	59	52	64	59	63	62	63	59	56	.	59	68	59	66	63	66	68	56	68	59	59	61	66	59	66	59	56	56	54	66	47	47	47	56	54	61	56	62	.	66
DTFLD2	45	75	50	45	47	47	47	48	.	55	120	55	.	48	53	52	52	49	.	48	48	47	55	49	49	55	47	55	45	55	48	49	47	47	47	47	47	50	49	46	48	47	49	47	48	48	57	50	90
DTFLD3	45	75	50	45	47	46.5	46.5	48	.	55	120	55	.	48	52.5	51.5	51.5	49	.	48	48	46.5	55	48.5	49	54.5	46.5	55	45	55	48	49	46.5	47	47	47	47	50	49	46	47.5	46.5	49	46.5	48	48	57	50	90
DTFLD4	60	96.5	66.25	53.75	61.25	70	53.5	64	63.67	68	67	69	71	68.5	67.5	78	67	61.75	78	69.25	.	70	70	76	66	56.25	96.75	73	60.25	74	70.67	58	67.75	67	63.75	70	62.5	66	64	56	54	53.5	56.75	64	58.25	68.5	70	59	168.25
DTFLD5	46.67	200	60.5	51.5	53.33	52.33	54.5	65	.	56	200	65	64	62	66	60	63	65	49	44	.	56	65	44	.	63.67	156	68.33	49	.	104	60.33	60.67	61.33	67	68	60	65.67	67	49	45.5	50.5	49	56	52.67	53.67	67.67	.	200
DTFLD6	44.5	57	49	46	48	43	53	56.5	.	43	.	58	64	59.5	68.5	55.5	53	37	49	53	52	47	54	54.5	57	54.5	52	63	50.5	67	66	.	55	47.5	55	51.5	55	54	56.5	39.5	42.5	43	41.5	55.5	50	48	46	65	.
[truncated: 136 more columns]
